# Supplementary material for: Etiological and epidemiological characteristics of severe acute respiratory infection caused by multiple viruses and Mycoplasma pneumoniae in adult patients in Jinshan, Shanghai: A pilot hospital-based surveillance study
Source: PubMed Central journal article supplement (PMC7984646; doi:10.1371/journal.pone.0248750), 2021-03-22

# PLOS ONE

## Etiological and epidemiological characters of severe acute respiratory infection caused by multiple viruses and mycoplasma pneumoniae in adult patients in Jinshan of Shanghai, April 2017 to March 2018: a pilot hospital-based surveillance study --Manuscript Draft--

|                              |                                                                                                                                                                                                                                                                                                                                                                                                                                                                                                                                                                                                                                                                                                                                                                                                                                                                                                                                                                                                                                                                                                                                                                                                                                                                                                                                                                                                                                                                                                                                                                                                                                                                                                                                                                                                                                                                                                                                                                                                                                                                                                                                                                                                                                                                                                                                                                                                                                                                                                                                                                                                                                                                                                     |
|------------------------------|-----------------------------------------------------------------------------------------------------------------------------------------------------------------------------------------------------------------------------------------------------------------------------------------------------------------------------------------------------------------------------------------------------------------------------------------------------------------------------------------------------------------------------------------------------------------------------------------------------------------------------------------------------------------------------------------------------------------------------------------------------------------------------------------------------------------------------------------------------------------------------------------------------------------------------------------------------------------------------------------------------------------------------------------------------------------------------------------------------------------------------------------------------------------------------------------------------------------------------------------------------------------------------------------------------------------------------------------------------------------------------------------------------------------------------------------------------------------------------------------------------------------------------------------------------------------------------------------------------------------------------------------------------------------------------------------------------------------------------------------------------------------------------------------------------------------------------------------------------------------------------------------------------------------------------------------------------------------------------------------------------------------------------------------------------------------------------------------------------------------------------------------------------------------------------------------------------------------------------------------------------------------------------------------------------------------------------------------------------------------------------------------------------------------------------------------------------------------------------------------------------------------------------------------------------------------------------------------------------------------------------------------------------------------------------------------------------|
| <b>Manuscript Number:</b>    | PONE-D-20-19561                                                                                                                                                                                                                                                                                                                                                                                                                                                                                                                                                                                                                                                                                                                                                                                                                                                                                                                                                                                                                                                                                                                                                                                                                                                                                                                                                                                                                                                                                                                                                                                                                                                                                                                                                                                                                                                                                                                                                                                                                                                                                                                                                                                                                                                                                                                                                                                                                                                                                                                                                                                                                                                                                     |
| <b>Article Type:</b>         | Research Article                                                                                                                                                                                                                                                                                                                                                                                                                                                                                                                                                                                                                                                                                                                                                                                                                                                                                                                                                                                                                                                                                                                                                                                                                                                                                                                                                                                                                                                                                                                                                                                                                                                                                                                                                                                                                                                                                                                                                                                                                                                                                                                                                                                                                                                                                                                                                                                                                                                                                                                                                                                                                                                                                    |
| <b>Full Title:</b>           | Etiological and epidemiological characters of severe acute respiratory infection caused by multiple viruses and mycoplasma pneumoniae in adult patients in Jinshan of Shanghai, April 2017 to March 2018: a pilot hospital-based surveillance study                                                                                                                                                                                                                                                                                                                                                                                                                                                                                                                                                                                                                                                                                                                                                                                                                                                                                                                                                                                                                                                                                                                                                                                                                                                                                                                                                                                                                                                                                                                                                                                                                                                                                                                                                                                                                                                                                                                                                                                                                                                                                                                                                                                                                                                                                                                                                                                                                                                 |
| <b>Short Title:</b>          | Etiological and epidemiological characters of severe acute respiratory infection                                                                                                                                                                                                                                                                                                                                                                                                                                                                                                                                                                                                                                                                                                                                                                                                                                                                                                                                                                                                                                                                                                                                                                                                                                                                                                                                                                                                                                                                                                                                                                                                                                                                                                                                                                                                                                                                                                                                                                                                                                                                                                                                                                                                                                                                                                                                                                                                                                                                                                                                                                                                                    |
| <b>Corresponding Author:</b> | JIAN LI<br>Ruijin Hospital, Shanghai Jiao Tong University, School of Medicine<br>Shanghai, CHINA                                                                                                                                                                                                                                                                                                                                                                                                                                                                                                                                                                                                                                                                                                                                                                                                                                                                                                                                                                                                                                                                                                                                                                                                                                                                                                                                                                                                                                                                                                                                                                                                                                                                                                                                                                                                                                                                                                                                                                                                                                                                                                                                                                                                                                                                                                                                                                                                                                                                                                                                                                                                    |
| <b>Keywords:</b>             | Severe acute respiratory infection, sentinel surveillance, pathogen, epidemiology                                                                                                                                                                                                                                                                                                                                                                                                                                                                                                                                                                                                                                                                                                                                                                                                                                                                                                                                                                                                                                                                                                                                                                                                                                                                                                                                                                                                                                                                                                                                                                                                                                                                                                                                                                                                                                                                                                                                                                                                                                                                                                                                                                                                                                                                                                                                                                                                                                                                                                                                                                                                                   |
| <b>Abstract:</b>             | <p><b>Background</b><br/>Severe acute respiratory infection (SARI) presents a tremendous disease burden worldwide. Available research on active surveillance of hospitalized adult patients suffered from SARI in China was limited. This piloting study aimed to identify etiologies and describe the demographic, epidemiological and clinical profiles of hospitalized SARI-associated patients over 16 years old in Jinshan, Shanghai.</p> <p><b>Methods</b><br/>Active surveillance was conducted at 1 sentinel hospital in Jinshan district, Shanghai from April 2017 to March 2018. Hospitalized SARI patients over 16 years old were enrolled, the pharyngeal swabs were collected within 24 hours of admission and tested for multiple respiratory viruses (including 18 common viruses) and Mycoplasma pneumoniae with real-time polymerase chain reaction. Demographic, epidemiological and clinical information were obtained from case report forms.</p> <p><b>Results</b><br/>Of 397 SARI patients enrolled, the median age was 68 years and 194(48.9%) were male. Totally 278(70.0%) had at least one underlying chronic medical conditions. The most frequent symptom was cough (99.2%) and sputum production (88.4%). The median duration of hospitalization was 10 days. A total of 250 patients (63.0%) were identified as at least one positive pathogen infection, of whom 198 (49.9%) were single infection and 52 (13.1%) were multiple infections. The pathogens identified most frequently were Mycoplasma pneumoniae (23.9%, 95/397), followed by adenovirus (11.6%, 46/397), influenza virus A/H3N2 (11.1%, 44/397) and human rhinovirus (8.1%, 32/397). The seasonality of pathogen-confirmed SARI patients conformed to a bimodal shape, with the first peak in summer and the second peak in winter. The statistically significant differences were observed with respect to the proportions of dyspnea, radiographic diagnosis of pneumonia and presence of at least one comorbidity among patients who were single-infected by M. pneumoniae, AdV, HRhV, Flu A/H3N2, Flu A/pH1N1 and Flu B/Yamagata. No significant difference among different age groups was attained with regard to the positive rate of main pathogens.</p> <p><b>Conclusions</b><br/>Mycoplasma pneumoniae, adenovirus and influenza virus A/H3N2 were the leading pathogens among hospitalized SARI patients aged more than 16 years in Jinshan district, Shanghai. Our finding highlights the importance of sustaining multi-pathogen surveillance of SARI patients in sentinel hospitals, which can provides useful information on etiology, epidemiology, and clinical characteristics.</p> |
| <b>Order of Authors:</b>     | JIAN LI<br>Can-Lei Song<br>Tang Wang<br>Yu-Long Ye                                                                                                                                                                                                                                                                                                                                                                                                                                                                                                                                                                                                                                                                                                                                                                                                                                                                                                                                                                                                                                                                                                                                                                                                                                                                                                                                                                                                                                                                                                                                                                                                                                                                                                                                                                                                                                                                                                                                                                                                                                                                                                                                                                                                                                                                                                                                                                                                                                                                                                                                                                                                                                                  |

|                                                                                                                                                                                                                                                                                                                                                                                                                                                                                                                                                                                                                                                                                                                                                                                                                                                                                                                                                                                                                                                                                                                                                                                                                                                                                                                                                                                     |                                                                                                                                                                                                                                                                                                                                                                                                       |
|-------------------------------------------------------------------------------------------------------------------------------------------------------------------------------------------------------------------------------------------------------------------------------------------------------------------------------------------------------------------------------------------------------------------------------------------------------------------------------------------------------------------------------------------------------------------------------------------------------------------------------------------------------------------------------------------------------------------------------------------------------------------------------------------------------------------------------------------------------------------------------------------------------------------------------------------------------------------------------------------------------------------------------------------------------------------------------------------------------------------------------------------------------------------------------------------------------------------------------------------------------------------------------------------------------------------------------------------------------------------------------------|-------------------------------------------------------------------------------------------------------------------------------------------------------------------------------------------------------------------------------------------------------------------------------------------------------------------------------------------------------------------------------------------------------|
|                                                                                                                                                                                                                                                                                                                                                                                                                                                                                                                                                                                                                                                                                                                                                                                                                                                                                                                                                                                                                                                                                                                                                                                                                                                                                                                                                                                     | Jian-Ru Du                                                                                                                                                                                                                                                                                                                                                                                            |
|                                                                                                                                                                                                                                                                                                                                                                                                                                                                                                                                                                                                                                                                                                                                                                                                                                                                                                                                                                                                                                                                                                                                                                                                                                                                                                                                                                                     | Shu-Hua Li                                                                                                                                                                                                                                                                                                                                                                                            |
|                                                                                                                                                                                                                                                                                                                                                                                                                                                                                                                                                                                                                                                                                                                                                                                                                                                                                                                                                                                                                                                                                                                                                                                                                                                                                                                                                                                     | Jian-Min Zhu                                                                                                                                                                                                                                                                                                                                                                                          |
| <b>Opposed Reviewers:</b>                                                                                                                                                                                                                                                                                                                                                                                                                                                                                                                                                                                                                                                                                                                                                                                                                                                                                                                                                                                                                                                                                                                                                                                                                                                                                                                                                           |                                                                                                                                                                                                                                                                                                                                                                                                       |
| <b>Additional Information:</b>                                                                                                                                                                                                                                                                                                                                                                                                                                                                                                                                                                                                                                                                                                                                                                                                                                                                                                                                                                                                                                                                                                                                                                                                                                                                                                                                                      |                                                                                                                                                                                                                                                                                                                                                                                                       |
| <b>Question</b>                                                                                                                                                                                                                                                                                                                                                                                                                                                                                                                                                                                                                                                                                                                                                                                                                                                                                                                                                                                                                                                                                                                                                                                                                                                                                                                                                                     | <b>Response</b>                                                                                                                                                                                                                                                                                                                                                                                       |
| <p><b>Financial Disclosure</b></p> <p>Enter a financial disclosure statement that describes the sources of funding for the work included in this submission. Review the <a href="#">submission guidelines</a> for detailed requirements. View published research articles from <a href="#">PLOS ONE</a> for specific examples.</p> <p>This statement is required for submission and <b>will appear in the published article</b> if the submission is accepted. Please make sure it is accurate.</p> <p><b>Unfunded studies</b><br/>Enter: <i>The author(s) received no specific funding for this work.</i></p> <p><b>Funded studies</b><br/>Enter a statement with the following details:</p> <ul style="list-style-type: none"> <li>• Initials of the authors who received each award</li> <li>• Grant numbers awarded to each author</li> <li>• The full name of each funder</li> <li>• URL of each funder website</li> <li>• Did the sponsors or funders play any role in the study design, data collection and analysis, decision to publish, or preparation of the manuscript?</li> <li>• <b>NO</b> - Include this sentence at the end of your statement: <i>The funders had no role in study design, data collection and analysis, decision to publish, or preparation of the manuscript.</i></li> <li>• <b>YES</b> - Specify the role(s) played.</li> </ul> <p>* typeset</p> | <p>This work was supported by the Research Project of Shanghai Municipal Health Commission (201940428) for Can-Lei Song and the Infectious Disease and Epidemiology Project of the 6th Jinshan District Medical Key Specialty Construction (JSZK2019B05) for Shu-Hua Li . The funder had no role in study design, data collection and analysis, decision to publish or preparation of manuscript.</p> |
| <p><b>Competing Interests</b></p> <p>Use the instructions below to enter a competing interest statement for this submission. On behalf of all authors, disclose any <a href="#">competing interests</a> that</p>                                                                                                                                                                                                                                                                                                                                                                                                                                                                                                                                                                                                                                                                                                                                                                                                                                                                                                                                                                                                                                                                                                                                                                    | <p>The authors have declared that no competing interests exist.</p>                                                                                                                                                                                                                                                                                                                                   |

could be perceived to bias this work—acknowledging all financial support and any other relevant financial or non-financial competing interests.

This statement **will appear in the published article** if the submission is accepted. Please make sure it is accurate. View published research articles from [PLOS ONE](#) for specific examples.

#### **NO authors have competing interests**

Enter: *The authors have declared that no competing interests exist.*

#### **Authors with competing interests**

Enter competing interest details beginning with this statement:

*I have read the journal's policy and the authors of this manuscript have the following competing interests: [insert competing interests here]*

\* typeset

#### **Ethics Statement**

Enter an ethics statement for this submission. This statement is required if the study involved:

- Human participants
- Human specimens or tissue
- Vertebrate animals or cephalopods
- Vertebrate embryos or tissues
- Field research

Write "N/A" if the submission does not require an ethics statement.

General guidance is provided below. Consult the [submission guidelines](#) for detailed instructions. **Make sure that all information entered here is included in the Methods section of the manuscript.**

This study belonged to the part of hospital-based surveillance program of SARI of Shanghai, and approved by the ethical review committee of the Shanghai Municipal Center for Disease Control and Prevention. Written informed consent was obtained from patients or proxies before enrollment.

**Format for specific study types**

**Human Subject Research (involving human participants and/or tissue)**

- Give the name of the institutional review board or ethics committee that approved the study
- Include the approval number and/or a statement indicating approval of this research
- Indicate the form of consent obtained (written/oral) or the reason that consent was not obtained (e.g. the data were analyzed anonymously)

**Animal Research (involving vertebrate animals, embryos or tissues)**

- Provide the name of the Institutional Animal Care and Use Committee (IACUC) or other relevant ethics board that reviewed the study protocol, and indicate whether they approved this research or granted a formal waiver of ethical approval
- Include an approval number if one was obtained
- If the study involved *non-human primates*, add *additional details* about animal welfare and steps taken to ameliorate suffering
- If anesthesia, euthanasia, or any kind of animal sacrifice is part of the study, include briefly which substances and/or methods were applied

**Field Research**

Include the following details if this study involves the collection of plant, animal, or other materials from a natural setting:

- Field permit number
- Name of the institution or relevant body that granted permission

**Data Availability**

Authors are required to make all data underlying the findings described fully available, without restriction, and from the time of publication. PLOS allows rare exceptions to address legal and ethical concerns. See the [PLOS Data Policy](#) and [FAQ](#) for detailed information.

No - some restrictions will apply

A Data Availability Statement describing where the data can be found is required at submission. Your answers to this question constitute the Data Availability Statement and **will be published in the article**, if accepted.

**Important:** Stating 'data available on request from the author' is not sufficient. If your data are only available upon request, select 'No' for the first question and explain your exceptional situation in the text box.

Do the authors confirm that all data underlying the findings described in their manuscript are fully available without restriction?

**Describe where the data may be found in full sentences. If you are copying our sample text, replace any instances of XXX with the appropriate details.**

- If the data are **held or will be held in a public repository**, include URLs, accession numbers or DOIs. If this information will only be available after acceptance, indicate this by ticking the box below. For example: *All XXX files are available from the XXX database (accession number(s) XXX, XXX).*
- If the data are all contained **within the manuscript and/or Supporting Information files**, enter the following: *All relevant data are within the manuscript and its Supporting Information files.*
- If neither of these applies but you are able to provide **details of access elsewhere**, with or without limitations, please do so. For example:

*Data cannot be shared publicly because of [XXX]. Data are available from the XXX Institutional Data Access / Ethics Committee (contact via XXX) for researchers who meet the criteria for access to confidential data.*

*The data underlying the results presented in the study are available from (include the name of the third party*

The data used and/or analyzed during this study are available from the corresponding author on reasonable request.

|                                                                                                                                                                                                                                         |  |
|-----------------------------------------------------------------------------------------------------------------------------------------------------------------------------------------------------------------------------------------|--|
| <p><i>and contact information or URL).</i></p> <ul style="list-style-type: none"><li>• This text is appropriate if the data are owned by a third party and authors do not have permission to share the data.</li></ul> <p>* typeset</p> |  |
| Additional data availability information:                                                                                                                                                                                               |  |

25 June, 2020

Dear Editor:

We would like to submit the enclosed manuscript entitled *Etiological and epidemiological characters of severe acute respiratory infection caused by multiple viruses and mycoplasma pneumoniae in adult patients in Jinshan of Shanghai, April 2017 to March 2018: a pilot hospital-based surveillance study*, which we wish to be considered for publication as a research article in PLOS ONE. No conflict of interest exists in the submission of this manuscript, and all the authors who made contributions to the manuscript are responsible for its content. I would like to declare on behalf of my co-authors that the work described with substantially the same content has not been submitted or published elsewhere.

Severe acute respiratory infection (SARI) is an important cause of morbidity and mortality in all ages worldwide, and is associated with various pathogens. So far, many studies regarding burden of SARI focuses on the children, epidemiological characterizations and distribution of the major etiologies are still limited on adult SARI patients in China. The present study is the first description of continuous surveillance of 19 respiratory pathogens of adult SARI patients in Shanghai, China. Our study implies that 63.0% of hospitalized adult SARI patients were identified as at least one positive pathogen infection, of whom 49.9% were single infection and 13.1% were multiple infections. The pathogens identified most frequently were *Mycoplasma pneumoniae* (23.93%), followed by adenovirus (11.59%) and influenza virus A/H3N2 (11.08%). The seasonality of pathogen-confirmed SARI patients conformed to a bimodal shape, with the first peak in summer and the second peak in winter.

We thought this study may be interesting to your readers. This manuscript has been reviewed and approved by all the authors for submission. We deeply appreciate your consideration of our manuscript, and we look forward to a favorable review.

Thank you and best regards.

Yours sincerely,

Jian Li

Clinical Research Center

Ruijin Hospital, Shanghai Jiao Tong University School of Medicine

Shanghai, China

Jian-Min Zhu

Department of Acute Infectious Diseases Control

Jinshan District Center for Diseases Control and Prevention

Shanghai, China



1 **Etiological and epidemiological characters of severe acute respiratory infection**  
2 **caused by multiple viruses and *mycoplasma pneumoniae* in adult patients in**  
3 **Jinshan of Shanghai, April 2017 to March 2018: a pilot hospital-based**  
4 **surveillance study**

5 Jian Li <sup>1†</sup>, Can-Lei Song <sup>2†</sup>, Tang Wang <sup>2†</sup>, Yu-Long Ye <sup>3</sup>, Jian-Ru Du <sup>3</sup>, Shu-Hua Li <sup>2</sup>, Jian-Min Zhu <sup>2</sup>

6 <sup>†</sup> Contributed equally

7 <sup>1</sup>*Clinical Research Center, Ruijin Hospital, Shanghai Jiao Tong University School of Medicine,*  
8 *Shanghai, China*

9 <sup>2</sup>*Department of Acute Infectious Diseases Control, Jinshan District Center for Diseases Control*  
10 *and Prevention, Shanghai, China*

11 <sup>3</sup>*Department of Microbiology, Jinshan District Center for Diseases Control and Prevention,*  
12 *Shanghai, China*

13 **Email addresses:**

14 Jian Li : nlijian@163.com

15 Can-Lei Song: 629309340@163.com

16 Tang Wang: 1090595528@qq.com

17 Yu-Long Ye: yeyulong99@163.com

18 Jian-Ru Du: 646947222@qq.com

19 Shu-Hua Li: hsli167@163.com

20 Jian-Min Zhu: zhujm12@163.com

21 **Corresponding author:**

22 Dr. Jian Li : Clinical Research Center, Ruijin Hospital, Shanghai Jiao Tong University School of

23 Medicine, 197 Ruijin Er Rd, Huangpu District, Shanghai, China,200025

24 Dr. Jian-Min Zhu: Department of Acute Infectious Diseases Control, Jinshan District Center for

25 Diseases Control and Prevention, 94 Weisheng Rd, Jinshan District, Shanghai, China, 201599

26

27

28

29

30

31

32

33

34

35

36

37

38

39

40

41

42

43

44

45 **Abstract**

46 **Background**

47 Severe acute respiratory infection (SARI) presents a tremendous disease burden worldwide.  
48 Available research on active surveillance of hospitalized adult patients suffered from SARI in  
49 China was limited. This pilot~~ing~~ study aimed to identify etiologies and describe the demographic,  
50 epidemiological and clinical profiles of hospitalized SARI-associated patients over 16 years old in  
51 Jinshan, Shanghai.

52 **Methods**

53 Active surveillance was conducted at 1 sentinel hospital in Jinshan district, Shanghai from April  
54 2017 to March 2018. Hospitalized SARI patients over 16 years old were enrolled, the pharyngeal  
55 swabs were collected within 24 hours of admission and tested for multiple respiratory viruses  
56 (including 18 common viruses) and *Mycoplasma pneumoniae* with real-time polymerase chain  
57 reaction. Demographic, epidemiological and clinical information were obtained from case report  
58 forms.

59 **Results**

60 Of 397 SARI patients enrolled, the median age was 68 years and 194(48.9%) were male. ~~Totally~~  
61 278(70.0%) had at least one underlying chronic medical conditions. The most frequent symptom  
62 was cough (99.2%) and sputum production (88.4%). The median duration of hospitalization was  
63 10 days. A total of 250 patients (63.0%) were identified as at least one positive pathogen infection,  
64 of whom 198 (49.9%) were single infection and 52 (13.1%) were multiple infections. The  
65 pathogens identified most frequently were *Mycoplasma pneumoniae* (23.9%, 95/397), followed by  
66 adenovirus (11.6%, 46/397), influenza virus A/H3N2 (11.1%, 44/397) and human rhinovirus

67 (8.1%, 32/397). The seasonality of pathogen-confirmed SARI patients conformed to a bimodal  
68 shape, with the first peak in summer and the second peak in winter. The statistically significant  
69 differences were observed with respect to the proportions of dyspnea, radiographic diagnosis of  
70 pneumonia and presence of at least one comorbidity among patients who were single-infected by  
71 *M. pneumoniae*, AdV, HRhV, Flu A/H3N2, Flu A /pH1N1 and Flu B/Yamagata. No significant  
72 difference among different age groups was attained with regard to the positive rate of main  
73 pathogens.

#### 74 **Conclusions**

75 *Mycoplasma pneumoniae*, adenovirus and influenza virus A/H3N2 were the leading pathogens  
76 among hospitalized SARI patients aged more than 16 years in Jinshan district, Shanghai. Our  
77 finding highlights the importance of sustaining multi-pathogen surveillance of SARI patients in  
78 sentinel hospitals, which can provides useful information on etiology, epidemiology, and clinical  
79 characteristics.

80 **Key words:** Severe acute respiratory infection, sentinel surveillance, pathogen, epidemiology

81

82

83

84

85

86

87

88

## 89 **Background**

90 Severe acute respiratory infection (SARI) has been considered an important cause of morbidity  
91 and mortality in all ages worldwide, particularly in children, the elderly and individuals with  
92 compromised immune, cardiac and pulmonary systems [1-3]. It is estimated that SARI caused  
93 approximately 4.2 million of deaths annually. Of these, up to 90% are believed to occur in  
94 developing countries [4]. Various viral and bacterial pathogens are associated with SARI. Due to  
95 their extremely high potential to human-to-human transmission, these pathogens pose a substantial  
96 risk to human health. While bacterial infections exert critical influence on causing severe  
97 pneumonia [5], a significant proportion of SARI are attributed to viral infections such as influenza  
98 viruses A and B(Flu A/B), parainfluenza viruses(PIV), adenovirus(AdV), respiratory syncytial  
99 viruses(RSV), human coronaviruses(HCoV) and human rhinovirus(HRV)[6]. Nevertheless,  
100 owing to the lack of gold standard methods to swiftly determine etiological diagnoses, most of the  
101 patients may be treated with antibiotics empirically [7]. Rapid etiologic diagnosis therefore  
102 remains a significant public health challenge.

103 Routine pathogen monitoring is critical for preparedness and response to the epidemic of SARI.  
104 Since SARI is the leading cause of hospitalization in children under the age of 5 years and of  
105 febrile episodes in infants younger than 3 months old [8, 9], most studies regarding the burden of  
106 SARI test for viruses and focus on the children. A study of SARI surveillance in China revealed 90%  
107 of patients were aged <15 years [10]. Besides, majority of the data on the epidemiology of the  
108 etiologic agents of SARI come from more developed regions. Epidemiological characterizations  
109 and distribution of the major viral agents in adult SARI patients are still limited in developing  
110 regions. *Mycoplasma pneumoniae* (*M. pneumoniae*) has long been considered an important

111 etiology of respiratory disease, and is more frequently isolated among children and young adults  
112 [11, 12]. Limited research is available on active surveillance of hospitalized adult patients suffered  
113 from SARI in China, and the available data on viruses and *M. pneumoniae* is limited to adults in  
114 eastern China. In response, a piloting, active surveillance system for SARI had been initiated to  
115 conduct epidemiologic and etiologic monitoring of SARI caused by various viral pathogens and  
116 *M. pneumoniae* in adult inpatients in Jinshan district, Shanghai since April 2017. The aim of  
117 present study is to characterize the demography and epidemiology of SARI, to identify the  
118 etiologies and to assess the clinical profiles of SARI in hospitalized adult patients in Jinshan,  
119 Shanghai during 12 months of surveillance.

## 120 **Materials and methods**

### 121 **Study setting**

122 Jinshan district is a suburb and located in southwest Shanghai, P.R.China. Surveillance was piloted  
123 at Jinshan district central hospital since April 2017 and lasted for 12 months. This hospital was  
124 selected as it is one of the largest general hospitals in the district and also the national surveillance  
125 sentinel for influenza. It serves most of population of Jinshan district with a total of 636 beds. In  
126 2017, the registered population in Jinshan district was 523641, of which 467320 (89.24%) were  
127 adults aged more than 18 years [13]. The annual mean temperature in this subtropical region is  
128 14.8°C and the average annual rainfall is about 1300mm.

### 129 **Study subjects**

130 All patients over 16 years old who were admitted to the sentinel hospital were screened by a  
131 trained physician between April 2017 and March 2018. Patients were defined as SARI case  
132 according to WHO definition if they have acute respiratory infection with measured fever of

133  $\geq 38^{\circ}\text{C}$ , cough, with onset within the last 10 days and require hospitalization.

#### 134 **Data collection**

135 After hospital admission, a standard case report form was completed for each eligible patient. The  
136 form comprised information on demographic characteristics (sex, age, weight, height, residence),  
137 vaccination (vaccinating influenza vaccine during 1 year before illness onset, vaccinating  
138 pneumococcal conjugate vaccine), admitting diagnosis, comorbidities (asthma, chronic bronchitis,  
139 chronic obstructive pulmonary disease (COPD), hypertension, diabetes, cardiovascular disease,  
140 tumor, etc), clinical presentation (fever, cough, difficult breathing, sore throat, etc), antibiotic  
141 treatments prior hospitalization, exposure history (smoking, visiting a live poultry market, contact  
142 with live poultry, contact with patient with fever and respiratory symptoms during 2 weeks before  
143 illness onset-). At discharge, the form was updated to include information on treatment accepted  
144 in hospital, chest computed tomographic (CT) scans, complications and prognosis. Data were  
145 collected by the trained physician. To ensure the accuracy of data, spouses or caregivers who lived  
146 with the patients for more than 2 weeks before illness onset were interviewed and medical records  
147 of the patients were reviewed as well. Two radiologists interpreted chest CT scans independently.  
148 When disagreement arose, a third radiologist was consulted to reach a final decision. All the  
149 information that could identify the identification of patients was masked during or after data  
150 collection.

#### 151 **Specimen collection and laboratory testing**

152 A single pharyngeal swab was collected from each SARI patient by nurse within 24 hours of  
153 admission following standard procedure. The swab was inserted into cryovial containing 3ml viral  
154 transport medium. The specimens were stored at  $4^{\circ}\text{C}$  in the hospital and transferred to the

155 laboratory at Jinshan district center for disease control and prevention(CDC), where they were  
156 preserved at -70°C until tests were performed. A total of 200 µl samples were adopted to extract  
157 viral RNA and DNA using the QIAamp Viral RNA Mini Kit (Qiagen, Hilden, Germany) following  
158 the manufacturer's instruction. Specimens were lysed at ~~strongly~~ denaturing conditions to  
159 deactivate RNases. ~~After adding alcohol and loading lysates onto the QIAamp spin column, viral~~  
160 ~~RNA and DNA combined to the QIAamp silica membrane while contaminants passed through.~~  
161 Pure viral RNA and DNA were eluted in low-salt buffer whereas impurities were removed. Total  
162 nucleic acid extracts were ~~further processed by~~ multiplex real-time reverse transcription  
163 polymerase chain reaction (RT-PCR). Respiratory pathogens 15 multiplex real-time RT-PCR  
164 diagnostic strategy was adopted to detect PIV (types 1, 2, 3 and 4), HCoV (types 229E, OC43,  
165 HKU1 and NL63), RSV (types A and B), HRhV, AdV, human metapneumovirus (HMPV), human  
166 bocavirus(HBoV) and *M. pneumoniae* using CFX96™ Real-time PCR System (Bio-Rad,  
167 Hercules, CA, USA) according to manufacturer's protocols. Besides, RNA from each specimen  
168 was identified for specific primers and probes that target Flu A/B using another real-time RT-PCR  
169 following the US CDC's protocol. Specimens found positive for Flu A and Flu B were  
170 subsequently sub typed for pandemic influenza A/H1N1(pH1N1) , seasonal A (H3N2) , together  
171 with Flu B/ Yamagata and Flu B/ Victoria, respectively [14]. These testing were performed in  
172 bio-safety level 2 laboratory of Jinshan CDC.

### 173 **Statistics**

174 The collected data were double-entered into a database constructed by EpiData 3.1. Logical  
175 checking for quality of data entry was conducted. The definition of single infection referred to an  
176 infection caused by one pathogen and multiple infections was defined as an infection caused by at



177 least 2 pathogens (virus/virus, virus/*M. pneumoniae*) in a single specimen. Categorical data were  
178 expressed as frequency and proportions, and continuous data were reported as median and  
179 inter-quartile range (IQR). Chi-squared test, Fisher's exact test and Mann-Whitney U test, as  
180 appropriate, were used to compare patients with and without confirmed pathogen in terms of  
181 demographic, clinical, epidemiologic characteristics, treatment and prognosis. For proportions, the  
182 binomial 95% confidence-interval was reported. The analysis was performed using SPSS v. 25.0  
183 (IBM Corporation, Armonk, NY, USA) and all tests were performed two-sided at the 5%  
184 significance level. 

## 185 **Results**

### 186 **Demographic characteristics**

187 From April 2017 to March 2018, a total of 397 patients meeting the SARI case definition were  
188 admitted to our sentinel site, of whom one or more positive pathogen were detected from 250  
189 patients (63.0%; 95%CI: 58.2-67.7%). The median age of patients were 68 years (IQR: 59-78;  
190 range: 16 to 99 years) and 194(48.9%) were male. The majority of patients were elderly aged  
191 equal to or more than 60 years (295 cases) and accounting for 74.3% of total patients. Those aged  
192 ~~less~~ than 30 years represented only 6.3% of patients (25 cases). The percentage of body mass  
193 index (BMI) <20, between 20 and 25, >25 accounted for 29.7%, 52.4% and 17.9%, respectively.  
194 ~~Totally~~, 278 SARI patients (70.0%) had at least one comorbidity (Table 1). The difference in  
195 proportion of gender, age, BMI and underlying chronic medical conditions between SARI patients  
196 with confirmed pathogen and those without confirmed pathogen did not show any statistical  
197 significance ( $P>0.05$ ).

### 198 **Etiology**

199 Of 397 SARI patients, 198 (49.9%; 95%CI: 45.0-54.8%) were identified as single infection and 52  
200 (13.1%; 95%CI: 9.8-16.4%) were multiple infections. The pathogen identified most frequently  
201 were *M. pneumoniae* in 95 (23.9% of the total samples) cases, followed by AdV in 46 (11.6%)  
202 cases, Flu A/H3N2 in 44 (11.1%) cases, HRhV in 32 (8.1%) cases, and Flu B/Yamagata in 25  
203 (6.3%). Other viruses including HBoV, RSV, HMPV, HCoV, PIV, Flu B/Victoria and Flu A/  
204 pH1N1 were detected in a proportion ranging from 0.3% to 4.0% of infection (Table 2). The most  
205 frequently detected pathogens in patients with multiple infection were *M. pneumoniae* (84.6%,  
206 44/52), AdV (28.8%, 15/52), HRhV (25.0%, 13/52), and Flu A/H3N2 (17.3%, 9/52).

### 207 **Clinical and epidemiologic characteristics**

208 Pneumonia (222 cases, 55.9%) was the most common clinical diagnosis made by clinicians on  
209 admission and followed by bronchiolitis (68 cases, 17.1%). The most common symptom on  
210 admission was cough (99.2%) and sputum production (88.4%), followed by thoracalgia (7.1%)  
211 and pharyngalgia (6.8%). A temperature  $\geq 39^{\circ}\text{C}$  was recorded in 47.6% of SARI patients on  
212 admission. A total of 382 SARI patients (96.2%) had the chest CT performed, in which 258  
213 (67.5%) were reported to have the presence of radiographic evidence of pneumonia. Thirty-two  
214 SARI patients and 30 patients had exposure of contacting with patients with fever and respiratory  
215 symptoms and contacting with live poultry during 2 weeks before their illness onset, respectively.  
216  Only 5 and 1 patient had history of vaccinating pneumococcal conjugate vaccine and influenza  
217 vaccine, respectively (Table 3). No significant differences in proportion of clinical and  
218 epidemiologic characteristics between SARI patients with confirmed pathogen and those without  
219 confirmed pathogen were attained except for chest radiographic examination. As for those  
220 single-infected patients by one of 6 kinds of main pathogens including *M. pneumoniae*, AdV,

221 HRhV, Flu A/H3N2, Flu A /pH1N1 and Flu B/Yamagata, the statistically significant differences  
222 were observed with respect to the proportions of dyspnea, radiographic diagnosis of pneumonia  
223 and presence of at least one comorbidity (Table 4). Notably, the presence of radiographic evidence  
224 of pneumonia was the highest in patients infected by *M. pneumoniae* (74.5%) and dyspnea was the  
225 most common in patients with HRhV (21.1%).

## 226 Seasonal trends

227 Fig 1 showed the monthly variations in the number of SARI patient identified as *M. pneumoniae*,  
228 AdV, Flu A/H3N2, Flu A /pH1N1, HRhV, and Flu B/Yamagata infection. Over the 12-month  
229 period, the temporal distribution of pathogen-confirmed SARI patients had a bimodal shape, with  
230 the first peak in the summer and the second peak in the winter. The duration of first positive peak  
231 was 2 months from August to September, but the second peak only lasted for 1 month. Peaks of  
232 pathogen seemed to be more attributable to the number of *M. pneumoniae* and AdV detection.  
233 Besides, Flu A/H3N2 was responsible for summer peak, whereas Flu B/Yamagata and Flu  
234 A/pH1N1 were dominantly representative of winter peak. Unlike other pathogen, HRhV appeared  
235 to be detected all year along and did not show apparent seasonality. Distributions of seasonal  
236 pattern of positive rate of main 6 pathogens were shown in Fig. 2. The prevalence of Flu A/H3N2  
237 peaked in summer (Jun-Aug) and autumn (Sep-Nov) with positive rate being 21.1% (20/95) and  
238 22.3% (21/94), respectively ( $P < 0.01$ ). However, ~~those of~~ Flu A/pH1N1 and Flu B/Yamagata  
239 peaked dominantly in winter (Dec-Feb) with positive rate being 9.8% (13/132) and 18.9% (25/132),  
240 respectively ( $P < 0.01$ ). It's worth noting that no SARI patients linked to Flu B/Yamagata infection  
241 were detected in spring (Mar-May), summer and autumn. Significantly higher positive rate of *M.*  
242 *pneumoniae* was observed in autumn (43.6%, 41/94), as compared with other season ( $P < 0.01$ ).

243 HRhV in spring had a positive rate (18.4%,14/76) significantly higher than that of other season  
244 ( $P<0.01$ ). The positive rate of AdV did not demonstrate obvious seasonality throughout the year  
245 ( $P>0.05$ ).

#### 246 **Age distribution**

247 The age group distributions of positive rate of main pathogens in SARI patients identified as *M.*  
248 *pneumoniae*, AdV, Flu A/H3N2, Flu A/pH1N1, HRhV, and Flu B/Yamagata infection were shown  
249 in Fig. 3. The prevalence of Flu A/pH1N1(8.0%) and AdV(20.0%) peaked in the group younger  
250 than 30 year old although the difference was not significant ( $P>0.05$ ). The positive rate of *M.*  
251 *pneumoniae*(36.2%) and Flu B/Yamagata(6.9%) were the highest in the group of 40-59 year old  
252 without statistical significance ( $P>0.05$ ). Moreover, no significant difference between different  
253 age groups was observed with regard to the positive rate of Flu A/H3N2 and HRhV. Interestingly,  
254 no patients infected with Flu A/H3N2 and HRhV were detected in 30-39 year old group.

#### 255 **Treatment and prognosis**

256 The median duration from illness onset to admission for SARI patients was 3 days (IQR: 2-5.5;  
257 range: 0 to 14 days), and median duration of hospitalization was 10 days (IQR: 8-13 days).  
258 Complications were present in 61 SARI patients, with electrolyte metabolism disorder (19 cases),  
259 respiratory failure (14 cases) and cardiac insufficiency (8 cases) being the most common as  
260 compared with other complications. Compared with SARI patients without confirmed pathogen,  
261 those with confirmed pathogen did not demonstrate more frequent use of antibiotics(levofloxacin,  
262 cephalosporin, azithromycin), antivirals (oseltamivir), glucocorticoid and oxygen therapy  
263 ( $P>0.05$ ). The duration of antibiotic use during hospitalization was 1-15 days (median: 9 days  
264 [IQR 5-11]) for SARI patients without confirmed pathogen and 1-20 days (median: 9 days [IQR

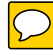

265 6-11]) for SARI patients with confirmed pathogen ( $P=0.68$ ). ~~Totally 3~~ SARI patients died ~~in the~~  
266 ~~periods of~~ hospitalization (Table 5).

## 267 **Discussion**

268 Hospital-based sentinel surveillance associated with SARI can provide a mechanism to monitor  
269 trends in this relatively severe disease and is critical for establishing platform to understand the  
270 epidemiologic and etiologic profiles at the local level. A monitoring study with regard to SARI  
271 patients in Georgia demonstrated that the proportion of patients positive for respiratory pathogens  
272 varied widely between seasons, from no positive for any of influenza in summer and early autumn  
273 (from July to October) to 30% of RSV in March in 2015–2017[1]. Another surveillance study of  
274 SARI patients in several countries revealed that the positive rate for influenza fluctuated  
275 extensively depending on country and season from 2.1% in Armenia in 2011–2012 to 100% in  
276 Albania in 2009–2010 [15]. A comparative study of viral profile in hospitalized SARI children in  
277 Beijing and Shanghai, China showed different patterns of viral profiles in 2 cities, in which  
278 RSV(52.9%) and HRhV/enterovirus(34.7%) were the most prevalent etiological agents of SARI in  
279 Beijing, whereas HRhV/enterovirus(33.6%) and HBoV(17.7%) were the main pathogens of SARI  
280 in Shanghai[16]. The early detection of divergent SARI pathogens through the sentinel  
281 surveillance network can measure the burden of disease severity and better prepare a region for  
282 emergency response. To our knowledge, this pilot study is the first description of continuous  
283 surveillance covering 19 respiratory pathogens among adult SARI patients in Shanghai of eastern  
284 China, which has provided better understanding of the epidemiology, etiologic spectrum and  
285 clinical profile. ~~Within 1~~ year of active surveillance, 397 patients ~~meeting~~ the established case  
286 definition of SARI were eligible for enrolling in this study, and 63.0% of patients were tested

287 positive for at least one pathogen. Our finding reached consensus with those reported elsewhere  
288 which revealed etiologies ranging from 50% to 85% of hospitalized SARI cases [7, 17-18].

289 During the ~~pilot~~ phase from April 2017 to March 2018 in Jinshan district, the main etiologies of  
290 SARI varied seasonally and *M. pneumoniae*, AdV, Flu A/H3N2, HRhV, together with Flu  
291 B/Yamagata were predominant pathogen depending on months, although other viruses such as Flu  
292 A/ pH1N1, HBoV, RSV, HMPV, HCoV, PIV and Flu B/Victoria were also present. Since our  
293 sentinel aims at surveillance of adult SARI patients, most of the enrolled patients were elder  
294 persons between 60-79 years old (52.1%) ~~and the second most in~~ those aged 80 and above  
295 (22.2%) . This was different from that observed in Madagascar [7], where the most suffered was  
296 observed in the less than 5-year-old age group (81.1%). Another similar study in Egypt also  
297 showed that children <5 years old accounted for 35.3% of SARI cases, whereas the elderly more  
298 than 64 years old only made up 25.2%[2]. Our study demonstrates that, unlike the tropical region,  
299 elder individuals are the most vulnerable group for suffering from SARI in subtropical region. In  
300 the present study, at least one chronic medical condition occurred in 70% of SARI patients. Our  
301 study population presented a high prevalence of comorbidities compared with the study in Hubei  
302 province, China [10], and may be partially explained by the inconsistency of socio-economic  
303 development between 2 regions. Hypertension and cardiovascular disease was observed in 38.3%  
304 and 7.6% of our population, respectively. And patients with confirmed pathogen had higher  
305 prevalence of cardiovascular disease than those without confirmed pathogen. One study suggested  
306 that diagnosed cardiovascular disease was commonly related to fatal endpoints among influenza  
307 positive SARI cases [19]. Our study revealed that the proportion of vaccinating influenza vaccine  
308 and pneumococcal conjugate vaccine was quite low, so the respiratory disease vaccination

309 programs with the target of individuals with cardiovascular related disease should be  
310 recommended. In this study, most patients presented with cough, sputum production and fever.  
311 These clinical features bear some resemblance to the report in previous study [1]. It should be  
312 alerted that empirical use of antibiotics use during hospitalization occurred in 99% patients in  
313 present study due to unavailability of rapid determining etiological diagnoses.

314 *M. pneumoniae* (23.9%) was the most frequent pathogen in present study. The positive  
315 detection rate of *M. pneumoniae* echoed the published data (19.7%) in north China [20]. A  
316 prospective study conducted in Hong Kong among adults hospitalized with pneumonia in 2004 to  
317 2005 found that *M. pneumoniae* was detected in 78/1,193 patients (6.5%)[21]. *M.*  
318 *pneumoniae* occurs endemically worldwide in many different climates. *M. pneumoniae* was  
319 mostly detected in autumn (43.6%) and spring (27.6%) in our study, but *M. pneumoniae* in  
320 Istanbul was more commonly identified in summer (44.9%) and winter (22.4 %) [22]. As the  
321 second common pathogen in this study, the positive rate of AdV did not significantly differ along  
322 with season change, and this trend in seasonality was consistent with previous reported seasonality  
323 of AdV detecting rate in China [23]. In contrast with the seasonality of viral respiratory SARI  
324 observed in Georgia in 2015-2017 and in northern China in 2014-2016, where the distinct  
325 winter-only peak of influenza circulation was observed[24,25], we found influenza peaked both in  
326 winter and in summer. Overall, influenza virus was common in this study, with Flu A/H3N2  
327 dominating in summer, and Flu B/Yamagata and Flu A/pH1N1 dominating in winter. Our finding  
328 suggested that SARI illness caused by Flu B virus were nearly twice  the illness associated with  
329 Flu A virus infections in winter, which was different from one study in USA in which estimated  
330 excess hospitalization rates associated with Flu B were lower than for Flu A/H3N2 [26]. In this

331 study, we also noted that no statistical difference were found in the positive rate of pathogens  
332 identified as *M. pneumoniae*, AdV, Flu A/H3N2, Flu A /pH1N1, HRhV, and Flu B /Yamagata  
333 among different age group. This phenomenon was basically the same as the previous study in  
334 north China [23], and may be attributable to susceptibility to these common viruses in different  
335 age group of adults. As reported elsewhere [27], co-infections were found relatively common in  
336 present study. ~~Totally~~, 13.1% of SARI patients were reported to have more than one pathogen  
337 infection, and the percentage was consistent with the finding of previous study (11.7%) [17].

### 338 **Limitations**

339 Our study was subject to several limitations. First, as a pilot project, this study was ~~enforced~~ at  
340 only 1 hospital although this hospital is the biggest hospital in the ~~site~~, so the finding may have  
341 relatively limited generalizability. Actually, ~~prevalence~~ of each pathogen may differ for regions  
342 having different climatic, demographic patterns and access to healthcare. Second, the result was  
343 based on SARI surveillance of a 12-month period, and the burden derived from SARI may not  
344 reflect the situation over several years. Finally, the pathogens which were included in this piloting  
345 surveillance study did not involve in related respiratory bacterium such as pneumococcus and  
346 ~~Bordetella pertussis~~, owing to limited financial support. Indeed, the inclusion of bacterium  
347 surveillance is under consideration to ~~incorporate~~ into our program.

### 348 **Conclusions**

349 In conclusion, the current study is the first study ~~surveilling~~ hospitalized adult SARI patients for  
350 most respiratory viruses and *M. pneumoniae* in Shanghai, and confirms that multiple respiratory  
351 pathogens may circulate among the SARI population and vary with the climatic and demographic  
352 characteristics. The finding highlights the importance of sustaining ~~enhancing~~ of sentinel



353 surveillance of SARI patients at the local and national levels, which can contribute to accurately  
354 evaluate the prevalence of etiology associated to SARI and the burden of disease, and, more  
355 importantly, to shape public policy on SARI prevention and response to SARI activity.

### 356 **Abbreviations**

357 AdV: Adenovirus; BMI: Body mass index; CDC: Center for disease control and prevention;  
358 COPD: Chronic obstructive pulmonary disease; Flu: Influenza; HBoV: Human bocavirus; HCoV:  
359 Human coronaviruses; HMPV:human metapneumovirus; HRhV: Human rhinovirus; IQR:  
360 Inter-quartile range; *M. pneumoniae*: Mycoplasma pneumonia; PIV: Parainfluenza virus; RSV:  
361 Respiratory syncytial virus; RT-PCR: Reverse transcription polymerase chain reaction; SARI:  
362 Severe acute respiratory infection

### 363 **Declarations**

### 364 **Acknowledgements**

365 We thank physicians and nurses from Jinshan district central hospital for their significant  
366 contribution to the data collection and specimen collection.

### 367 **Funding**

368 This work was supported by the Research Project of Shanghai Municipal Health Commission  
369 (201940428) and the Infectious Disease and Epidemiology Project of the 6<sup>th</sup> Jinshan District  
370 Medical Key Specialty Construction (JSZK2019B05). The funder had no role in study design,  
371 data collection and analysis, decision to publish or preparation of manuscript.

### 372 **Availability of data and materials**

373 The datasets used and/or analyzed during this study are available from the corresponding author  
374 on reasonable request.

375 **Authors' contributions**

376 JL and JMZ conceived and designed the study and critically revised the manuscript. YLY and JRD  
377 performed the experiments. JL, CLS and TW analyzed the data and drafted the manuscript. CLS,  
378 TW and SHL participated in the study investigation, data entry and clean. All the authors have  
379 read and approved the final manuscript.

380 **Ethics approval and consent to participate** 

381 This study belonged to the part of hospital-based surveillance program of SARI of Shanghai, and  
382 approved by the ethical review committee of the Shanghai Municipal Center for Disease Control  
383 and Prevention. Written informed consent was obtained from patients or proxies before enrollment.  
384 Data were accessible only to authorized members of the core study team.

385 **Consent for publication**

386 Not applicable.

387 **Competing interests**

388 The authors declare that they have no competing interests.

389

390 **References**

- 391 [1]Chakhunashvili G, Wagner AL, Power LE, Janusz CB, Machablishvili A, Karseladze I, et al.  
392 Severe Acute Respiratory Infection (SARI) sentinel surveillance in the country of Georgia,  
393 2015-2017. PLoS One.2018;13(7):e0201497.
- 394 [2]Elhakim MM, Kandil SK, Abd Elaziz KM, Anwar WA. Epidemiology of Severe Acute  
395 Respiratory Infection (SARI) cases at a sentinel site in Egypt,2013-15. J Public Health (Oxf).  
396 2019.doi: 10.1093/pubmed/fdz053.

397 [3]Williams B, Gouws E, Boschi-Pinto C, Bryce J, Dye C. Estimates of world-wide distribution of  
398 child deaths from acute respiratory infections. *Lancet Infect Dis.* 2002;2:25–32.

399 [4]WHO. The global burden of disease: 2004 update. Geneva: World Health Organization. 2008.  
400 [http://www.who.int/healthinfo/global\\_burden\\_disease/GBD\\_report\\_2004update\\_full.pdf](http://www.who.int/healthinfo/global_burden_disease/GBD_report_2004update_full.pdf).

401 [5] Watt JP, Wolfson LJ, O’Brien KL, Henkle E, Deloria-Knoll M, McCall N, et al. Burden of  
402 disease caused by *Haemophilus influenzae* type b in children younger than 5 years: global  
403 estimates. *Lancet.* 2009;374(9693): 903–911.

404 [6]Subramoney K, Hellferscee O, Pretorius M, Tempia S, McMorrow M, von Gottberg A, et al.  
405 Human bocavirus, coronavirus, and polyomavirus detected among patients hospitalised with severe  
406 acute respiratory illness in South Africa, 2012 to 2013. *Health Sci Rep.* 2018;1(8):e59.

407 [7]Razanajatovo NH, Guillebaud J, Harimanana A, Rajatonirina S, Ratsima EH, Andrianirina ZZ,  
408 et al. Epidemiology of severe acute respiratory infections from hospital-based surveillance in  
409 Madagascar, November 2010 to July 2013. *PLoS One.* 2018;13(11):e0205124.

410 [8]World Health Organization. WHO global technical consultation: global standards and tools for  
411 influenza surveillance. Geneva: World Health Organization; 2011.

412 [9] Byington CL, Enriquez FR, Hoff C, et al. Serious bacterial infections in febrile infants 1 to 90  
413 days old with and without viral infections. *Pediatrics.* 2004;113(6):1662–6.

414 [10]Yu H, Huang J, Huai Y, Guan X, Klena J, Liu S, et al. The substantial  
415 hospitalization burden of influenza in central China: surveillance for severe, acute respiratory  
416 infection, and influenza viruses, 2010–2012. *Influenza Other Respir Viruses.* 2014;8(1):53–65.

417 [11] Foy HM, Cooney MK, McMahan R, et al. Viral and mycoplasmal pneumonia in a prepaid  
418 medical care group during an eight-year period. *Am J Epidemiol.* 1973; 97: 93–102.

419 [12]Waites KB, Xiao L, Liu Y, et al. *Mycoplasma pneumoniae* from the respiratory tract and  
420 beyond. *Clin Microbiol Rev.*2017; 30: 747-809.

421 [13] Bureau of statistics of Jinshan district. *Jinshan statistical yearbook 2018.*  
422 <http://www.jinshan.gov.cn/Attach/Attaches/201911/201911140517237545.pdf>.

423 [14] WHO. *Manual for the laboratory diagnosis and virological surveillance of influenza.* 2011.  
424 [http://whqlibdoc.who.int/publications/2011/9789241548090\\_eng.pdf](http://whqlibdoc.who.int/publications/2011/9789241548090_eng.pdf).

425 [15] Meerhoff TJ, Simaku A, Ulqinaku D, Torosyan L, Gribkova N, Shimanovich V, et al.  
426 *Surveillance for severe acute respiratory infections (SARI) in hospitals in the WHO European*  
427 *region—an exploratory analysis of risk factors for a severe outcome in influenza-positive SARI*  
428 *cases.* *BMC Infect Dis.* 2015;15: 1.

429 [16]Zhao Y, Lu R, Shen J, Xie Z, Liu G, Tan W. *Comparison of viral and epidemiological profiles*  
430 *of hospitalized children with severe acute respiratory infection in Beijing and Shanghai, China.*  
431 *BMC Infect Dis.* 2019;19(1):729.

432 [17]Huo X, Qin Y, Qi X, Zu R, Tang F, Li L, et al. *Surveillance of 16 respiratory viruses in*  
433 *patients with influenza-like illness in Nanjing, China.* *J Med Virol.* 2012;84(12):1980-4.

434 [18]Breiman RF, Cosmas L, Njenga M, Williamson J, Mott JA, Katz MA, et al. *Severe acute*  
435 *respiratory infection in children in a densely populated urban slum in Kenya, 2007–2011.* *BMC*  
436 *Infect Dis.* 2015; 15: 95.

437 [19]Butsashvili M, Kandelaki G, Zakhshvili K, Machablishvili A, Avaliani N.  
438 *Influenza-associated mortality in georgia (2009-2011).* *Influenza Res Treat.* 2012;2012:480763.

439 [20]Xu W, Guo L, Dong X, Li X, Zhou P, Ni Q, et al. *Detection of viruses and mycoplasma*  
440 *pneumonia in hospitalized patients with severe acute respiratory infection in northern*

441 China,2015-2016. *Jpn J Infec Dis.* 2018;71(2):134-139.

442 [21] Lui G, Ip M, Lee N, Rainer TH, Man SY, Cockram CS, et al. Role of ‘atypical pathogens’  
443 among adult hospitalized patients with community-acquired  
444 pneumonia. *Respirology.*2009; 14:1098–1105.

445 [22] Goktas S, Sirin MC. Prevalence and seasonal distribution of respiratory viruses during the  
446 2014 – 2015 season in Istanbul. *Jundishapur J Microbiol.* 2016; 9(9): e39132.

447 [23]Zhao Y, Lu R, Shen J, Xie Z, Liu G, Tan W. Comparison of viral and epidemiological profiles  
448 of hospitalized children with severe acute respiratory infection in Beijing and Shanghai, China.  
449 *BMC Infect Dis.*2019;19(1):729.

450 [24]Azziz Baumgartner E, Dao CN, Nasreen S, Bhuiyan MU, Mah-E-Muneer S, Ai Mamun A. et  
451 al. Seasonality, timing, and climate drivers of influenza activity worldwide. *J Infect Dis.* 2012;  
452 206(6):838-46.

453 [25]Zhang Y, Muscatello DJ, Wang Q, Yang P, Pan Y, Huo D, et al. Hospitalizations for  
454 influenza-associated severe acute respiratory infection, Beijing, China, 2014-2016. *Emerg Infect*  
455 *Dis.* 2018;24(11):2098-2102.

456 [26] Thompson WW, Shay DK, Weintraub E, Brammer L, Bridges CB, Cox NJ, et al.  
457 Influenza-associated hospitalizations in the United States. *JAMA.* 2004; 292(11):1333–1340.

458 [27]Hasman H, Pachucki CT, Unal A, Nguyen D, Devlin T, Peeples ME, et al. Aetiology of  
459 influenza-like illness in adults includes parainfluenzavirus type 4. *J Med Microbiol.*  
460 2009;58(Pt4):408–413.

461

462

463 **Table 1.** Demographic characteristics of adult SARI patients in a surveillance hospital in Jinshan,  
 464 Shanghai, April 2017 to March 2018

| Characteristics            | All SARI patients (%)<br>[n=397] | SARI patients with confirmed pathogen (%)<br>[n=250] | SARI patients without confirmed pathogen (%)<br>[n=147] | <i>P</i> value* |
|----------------------------|----------------------------------|------------------------------------------------------|---------------------------------------------------------|-----------------|
| Male gender                | 194(48.9)                        | 127(50.8)                                            | 67(45.6)                                                | 0.315           |
| Age group(median, years)   | 68.0                             | 67.0                                                 | 69.0                                                    | 0.357           |
| <30                        | 25(6.3)                          | 17(6.8)                                              | 8(5.4)                                                  | 0.786           |
| 30-39                      | 19(4.8)                          | 10(4.0)                                              | 9(6.1)                                                  |                 |
| 40-59                      | 58(14.6)                         | 39(15.6)                                             | 19(12.9)                                                |                 |
| 60-79                      | 207(52.1)                        | 128(51.2)                                            | 79(53.7)                                                |                 |
| ≥80                        | 88(22.2)                         | 56(22.4)                                             | 32(21.9)                                                |                 |
| BMI                        |                                  |                                                      |                                                         | 0.657           |
| <20                        | 118(29.7)                        | 73(29.2)                                             | 45(30.6)                                                |                 |
| 20-25                      | 208(52.4)                        | 135(54.0)                                            | 73(49.7)                                                |                 |
| >25                        | 71(17.9)                         | 42(16.8)                                             | 29(19.7)                                                |                 |
| Chronic medical conditions |                                  |                                                      |                                                         |                 |
| At least one               | 278(70.0)                        | 178(71.2)                                            | 100(68.0)                                               | 0.505           |
| Asthma                     | 12(3.0)                          | 6(2.4)                                               | 6(4.1)                                                  | 0.345           |
| Chronic bronchitis         | 49(12.3)                         | 30(12.0)                                             | 19(12.9)                                                | 0.787           |
| COPD                       | 28(7.1)                          | 13(5.2)                                              | 15(10.2)                                                | 0.060           |
| Hypertension               | 152(38.3)                        | 95(38.0)                                             | 57(38.8)                                                | 0.878           |
| Cardiovascular disease     | 30(7.6)                          | 22(8.8)                                              | 8(5.4)                                                  | 0.222           |
| Diabetes                   | 61(15.4)                         | 38(15.2)                                             | 23(15.6)                                                | 0.905           |
| Cerebrovascular disorder   | 20(5.0)                          | 14(5.6)                                              | 6(4.1)                                                  | 0.504           |
| Tumor                      | 19(4.8)                          | 14(5.6)                                              | 5(3.4)                                                  | 0.322           |

465 \*The *P* values denoted comparisons between SARI patients with confirmed pathogen and SARI  
 466 patients without confirmed pathogen.

467

468 **Table 2.** Etiology distribution of adult SARI patients in a surveillance hospital in Jinshan,  
 469 Shanghai, April 2017 to March 2018

| Viral etiology              | Frequency(n) | Percent of patients (%) |
|-----------------------------|--------------|-------------------------|
| Influenza virus A           |              |                         |
| pH1N1                       | 16           | 4.0                     |
| H3N2                        | 44           | 11.1                    |
| Influenza virus B           |              |                         |
| Yamagata                    | 25           | 6.3                     |
| Victoria                    | 2            | 0.5                     |
| Parainfluenza virus         |              |                         |
| Type 1                      | 8            | 2.0                     |
| Type 2                      | 0            | 0                       |
| Type 3                      | 6            | 1.5                     |
| Type 4                      | 5            | 1.3                     |
| Human coronavirus           |              |                         |
| Type 229E                   | 6            | 1.5                     |
| Type OC43                   | 4            | 1.0                     |
| Type HKU1                   | 6            | 1.5                     |
| Type NL63                   | 8            | 2.0                     |
| Respiratory syncytial virus |              |                         |
| Type A                      | 0            | 0                       |
| Type B                      | 2            | 0.5                     |
| Human rhinovirus            | 32           | 8.1                     |
| Adenovirus                  | 46           | 11.6                    |
| Human metapneumovirus       | 6            | 1.5                     |
| Human bocavirus             | 1            | 0.3                     |
| <i>Mycoplasma pneumonia</i> | 95           | 23.9                    |
| Single infection            | 198          | 49.9                    |
| Multiple infection          |              |                         |

|             |    |      |
|-------------|----|------|
| 2 pathogens | 43 | 10.8 |
| 3 pathogens | 8  | 2.0  |
| 4 pathogens | 1  | 0.3  |

---

470  
471  
472  
473  
474  
475  
476  
477  
478  
479  
480  
481  
482  
483  
484  
485  
486  
487  
488  
489  
490  
491  
492  
493  
494  
495  
496



497 **Table 3.** Clinical and epidemiologic characteristics of adult SARI patients in a surveillance  
 498 hospital in Jinshan, Shanghai, April 2017 to March 2018

| Characteristics                                 | All patients (%)<br>[n=397] | SARI patients confirmed pathogen (%)<br>[n=250] | SARI patients with SARI patients without confirmed pathogen (%)<br>[n=147] | <i>P</i> value* |
|-------------------------------------------------|-----------------------------|-------------------------------------------------|----------------------------------------------------------------------------|-----------------|
| Temperature $\geq 39^{\circ}\text{C}$           | 189(47.6)                   | 126(50.4)                                       | 63(42.9)                                                                   | 0.176           |
| Cough                                           | 394(99.2)                   | 249(99.6)                                       | 145(98.6)                                                                  | 0.558           |
| Sputum production                               | 351(88.4)                   | 219(87.6)                                       | 132(89.8)                                                                  | 0.509           |
| Pharyngalgia                                    | 27(6.8)                     | 18(7.2)                                         | 9(6.1)                                                                     | 0.680           |
| Thoracalgia                                     | 28(7.1)                     | 19(7.6)                                         | 9(6.1)                                                                     | 0.687           |
| Dyspnea                                         | 19(4.8)                     | 11(4.4)                                         | 8(5.4)                                                                     | 0.808           |
| Runny nose                                      | 11(2.8)                     | 7(2.8)                                          | 4(2.7)                                                                     | 1.000           |
| Vomiting                                        | 15(3.8)                     | 10(4.0)                                         | 5(3.4)                                                                     | 0.795           |
| Chest radiographic exam                         | 382(96.2)                   | 236(94.4)                                       | 146(99.3)                                                                  | 0.013           |
| Presence of radiographic diagnosis of pneumonia | 258/382(67.5)               | 153/236(64.8)                                   | 105/146(71.9)                                                              | 0.349           |
| Visiting a live poultry market                  | 3(0.8)                      | 3(1.2)                                          | 0(0)                                                                       | 0.299           |
| Contact with live poultry                       | 30(7.6)                     | 19(7.6)                                         | 11(7.5)                                                                    | 1.000           |
| Contact with patient with fever                 | 32(8.1)                     | 24(9.6)                                         | 8(5.4)                                                                     | 0.182           |
| Smoking                                         |                             |                                                 |                                                                            | 0.860           |
| Current s                                       | 43(10.8)                    | 28(11.2)                                        | 15(10.2)                                                                   |                 |
| Former                                          | 66(16.6)                    | 43(17.2)                                        | 23(15.6)                                                                   |                 |
| Never                                           | 288(72.6)                   | 179(71.6)                                       | 109(74.2)                                                                  |                 |
| Vaccinating pneumococcal conjugate vaccine      | 5(1.3)                      | 3(1.2)                                          | 2(1.4)                                                                     | 1.000           |
| Vaccinating influenza vaccine                   | 1(0.3)                      | 1(0.4)                                          | 0(0)                                                                       | 1.000           |

499 \*The *P* values denoted comparisons between SARI patients with confirmed pathogen and SARI  
 500 patients without confirmed pathogen.

501 **Table 4.** Characteristics of single-infected SARI patients in a surveillance hospital in Jinshan,  
 502 Shanghai, April 2017 to March 2018 by six main pathogens

|                                                 | <i>M.</i><br><i>pneumoniae</i><br>(%)<br>[n=51] | AdV(%)<br>[n=31] | HRhV(%)<br>[n=19] | Flu<br>A/H3N2(<br>%)<br>[n=35] | Flu<br>B/Yama<br>gata(%)<br>[n=21] | Flu<br>A<br>/pH1N1(<br>%)<br>[n=16] | <i>P</i> value* |
|-------------------------------------------------|-------------------------------------------------|------------------|-------------------|--------------------------------|------------------------------------|-------------------------------------|-----------------|
| Male                                            | 28(54.9)                                        | 19(61.3)         | 8(42.1)           | 18(51.4)                       | 9(42.9)                            | 8(50.0)                             | 0.750           |
| Age group(years)                                |                                                 |                  |                   |                                |                                    |                                     | 0.247           |
| <30                                             | 5(9.8)                                          | 3(9.7)           | 1(5.3)            | 1(2.9)                         | 0(0)                               | 2(12.5)                             |                 |
| 30-39                                           | 3(5.9)                                          | 3(9.7)           | 0(0)              | 0(0)                           | 1(4.8)                             | 1(6.3)                              |                 |
| 40-59                                           | 12(23.5)                                        | 1(3.2)           | 2(10.5)           | 5(14.3)                        | 3(14.3)                            | 2(12.5)                             |                 |
| 60-79                                           | 20(39.2)                                        | 15(48.4)         | 8(42.1)           | 24(68.6)                       | 12(57.1)                           | 9(56.3)                             |                 |
| ≥80                                             | 11(21.6)                                        | 9(29.0)          | 8(42.1)           | 5(14.3)                        | 5(23.8)                            | 2(12.5)                             |                 |
| at least one comorbidity                        | 25(49.0)                                        | 23(74.2)         | 13(68.4)          | 26(74.3)                       | 18(85.7)                           | 11(68.8)                            | 0.034           |
| Temperature ≥39°C                               | 30(58.8)                                        | 16(51.6)         | 6(31.6)           | 16(45.7)                       | 9(42.9)                            | 8(50.0)                             | 0.444           |
| Cough                                           | 51(100)                                         | 31(100)          | 19(100)           | 34(97.1)                       | 21(100)                            | 16(100)                             | 0.705           |
| Sputum production                               | 39(76.5)                                        | 29(93.5)         | 15(78.9)          | 30(85.7)                       | 19(90.5)                           | 16(100)                             | 0.120           |
| Pharyngalgia                                    | 3(5.9)                                          | 3(9.7)           | 2(10.5)           | 2(5.7)                         | 2(9.5)                             | 2(12.5)                             | 0.876           |
| Thoracalgia                                     | 4(7.8)                                          | 2(6.5)           | 1(5.3)            | 0(0)                           | 2(9.5)                             | 1(6.3)                              | 0.523           |
| Dyspnea                                         | 0(0)                                            | 1(3.2)           | 4(21.1)           | 1(2.9)                         | 1(4.8)                             | 0(0)                                | 0.007           |
| Runny nose                                      | 1(2.0)                                          | 1(3.2)           | 1(5.3)            | 1(2.9)                         | 0(0)                               | 2(12.5)                             | 0.360           |
| Vomiting                                        | 0(0)                                            | 3(9.7)           | 0(0)              | 3(8.6)                         | 1(4.8)                             | 1(6.3)                              | 0.123           |
| Presence of radiographic diagnosis of pneumonia | 38(74.5)                                        | 17(54.8)         | 13(68.4)          | 15(42.9)                       | 13(61.9)                           | 7(43.8)                             | 0.042           |
| Contact with live poultry                       | 6(11.8)                                         | 3(9.7)           | 2(10.5)           | 1(2.9)                         | 1(4.8)                             | 1(6.3)                              | 0.753           |
| Contact with patient with fever                 | 3(5.9)                                          | 4(12.9)          | 2(10.5)           | 1(2.9)                         | 3(14.3)                            | 2(12.5)                             | 0.442           |
| Current Smoking                                 | 2(3.9)                                          | 4(12.9)          | 2(10.5)           | 6(17.1)                        | 3(14.3)                            | 3(18.8)                             | 0.333           |
| Former Smoking                                  | 10(19.6)                                        | 7(22.6)          | 2(10.5)           | 7(20.0)                        | 3(14.3)                            | 0(0)                                |                 |
| Never Smoking                                   | 39(76.5)                                        | 20(64.5)         | 15(78.9)          | 22(62.9)                       | 15(71.4)                           | 13(81.3)                            |                 |

503 \*The *P* values denoted comparisons among six main pathogens.

504

505 **Table 5.** Treatment and prognosis of adult SARI patients in a surveillance hospital in Jinshan,

506 Shanghai, April 2017 to March 2018

| Characteristics                    | All patients (%)<br>[n=397] | SARI patients confirmed pathogen (%)<br>[n=250] | SARI patients with SARI patients without confirmed pathogen (%)<br>[n=147] | <i>P</i> value* |
|------------------------------------|-----------------------------|-------------------------------------------------|----------------------------------------------------------------------------|-----------------|
| Clinical course(median, days)      |                             |                                                 |                                                                            |                 |
| From illness onset to admission    | 3                           | 3                                               | 3                                                                          | 0.567           |
| Length of hospitalization          | 10                          | 10                                              | 10                                                                         | 0.545           |
| Antibiotics prior hospitalization  | 241 (61.0)                  | 151 (60.9)                                      | 90 (61.2)                                                                  | 0.723           |
| Antibiotics during hospitalization | 393(99.0)                   | 246(98.4)                                       | 147(100)                                                                   | 0.301           |
| Antiviral                          | 11(2.8)                     | 7(2.8)                                          | 4(2.7)                                                                     | 1.000           |
| Glucocorticoids                    | 112(28.2)                   | 72(27.2)                                        | 40(28.8)                                                                   | 0.734           |
| Oxygen therapy                     | 196(49.4)                   | 124(49.6)                                       | 72(49.0)                                                                   | 0.918           |
| Complications                      | 61(15.4)                    | 37(14.8)                                        | 24(16.3)                                                                   | 0.684           |
| Death                              | 3(0.8)                      | 2(0.8)                                          | 1(0.7)                                                                     | 1.000           |

507 \*The *P* values denoted comparisons between SARI patients with confirmed pathogen and SARI

508 patients without confirmed pathogen.

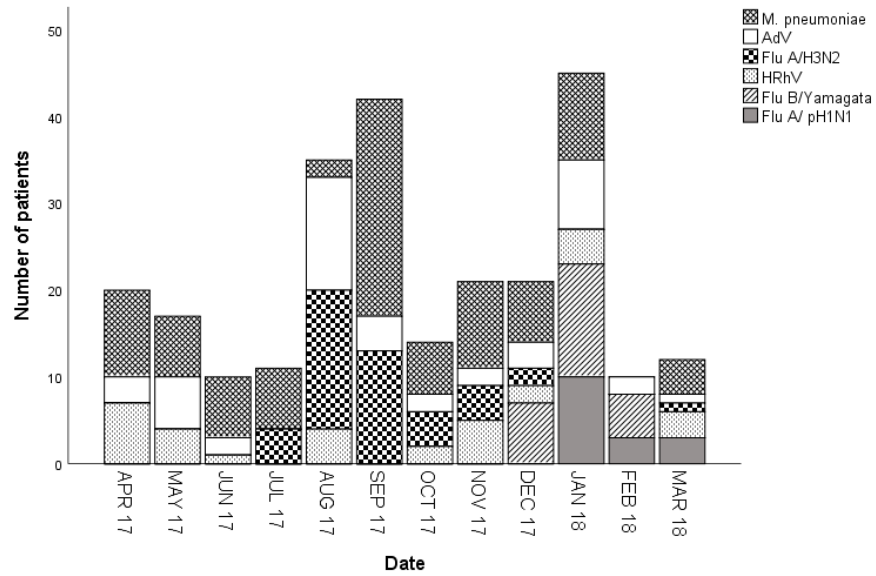

**Fig. 1** Monthly variation of six main pathogens detected among adult SARI patients in a surveillance hospital in Jinshan, Shanghai, April 2017 to March 2018

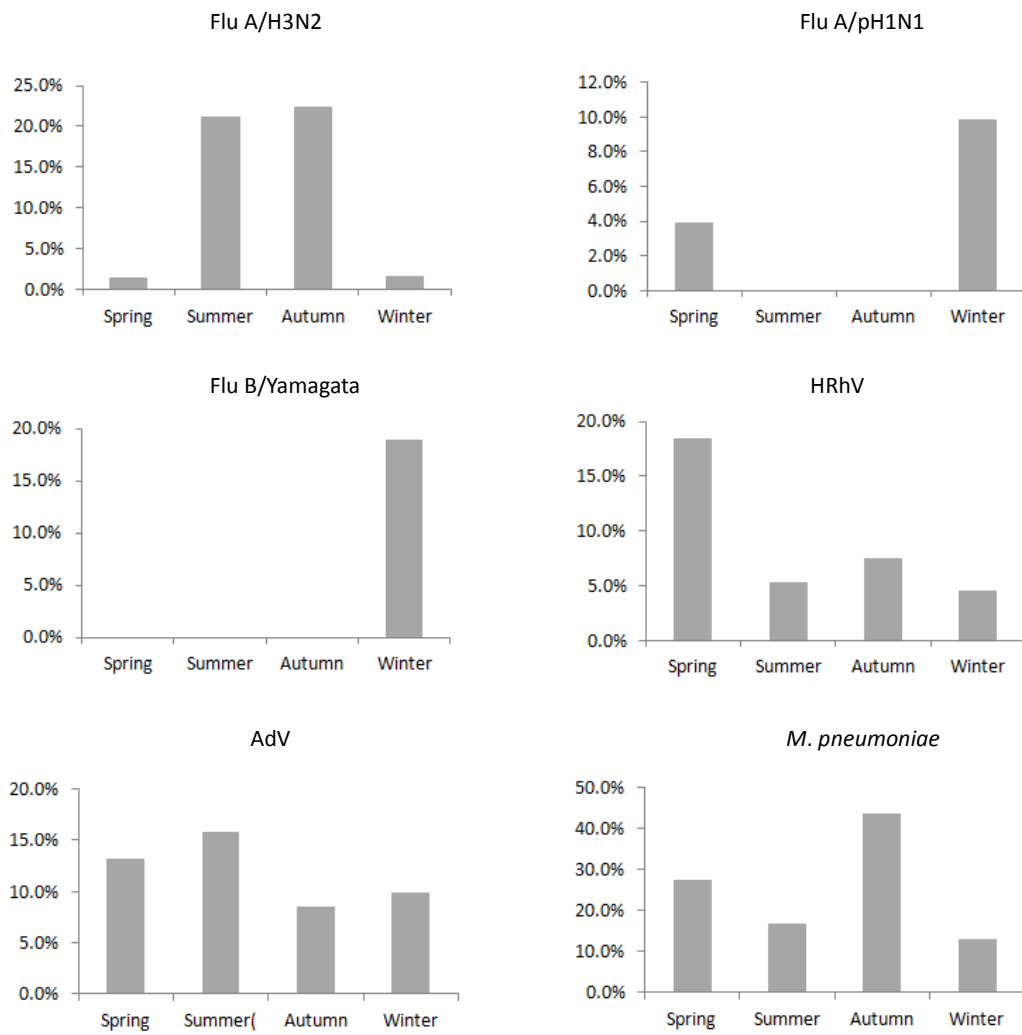

**Fig. 2** Detection rate of six main pathogens among adult SARI patients in different seasons in a surveillance hospital in Jinshan, Shanghai.

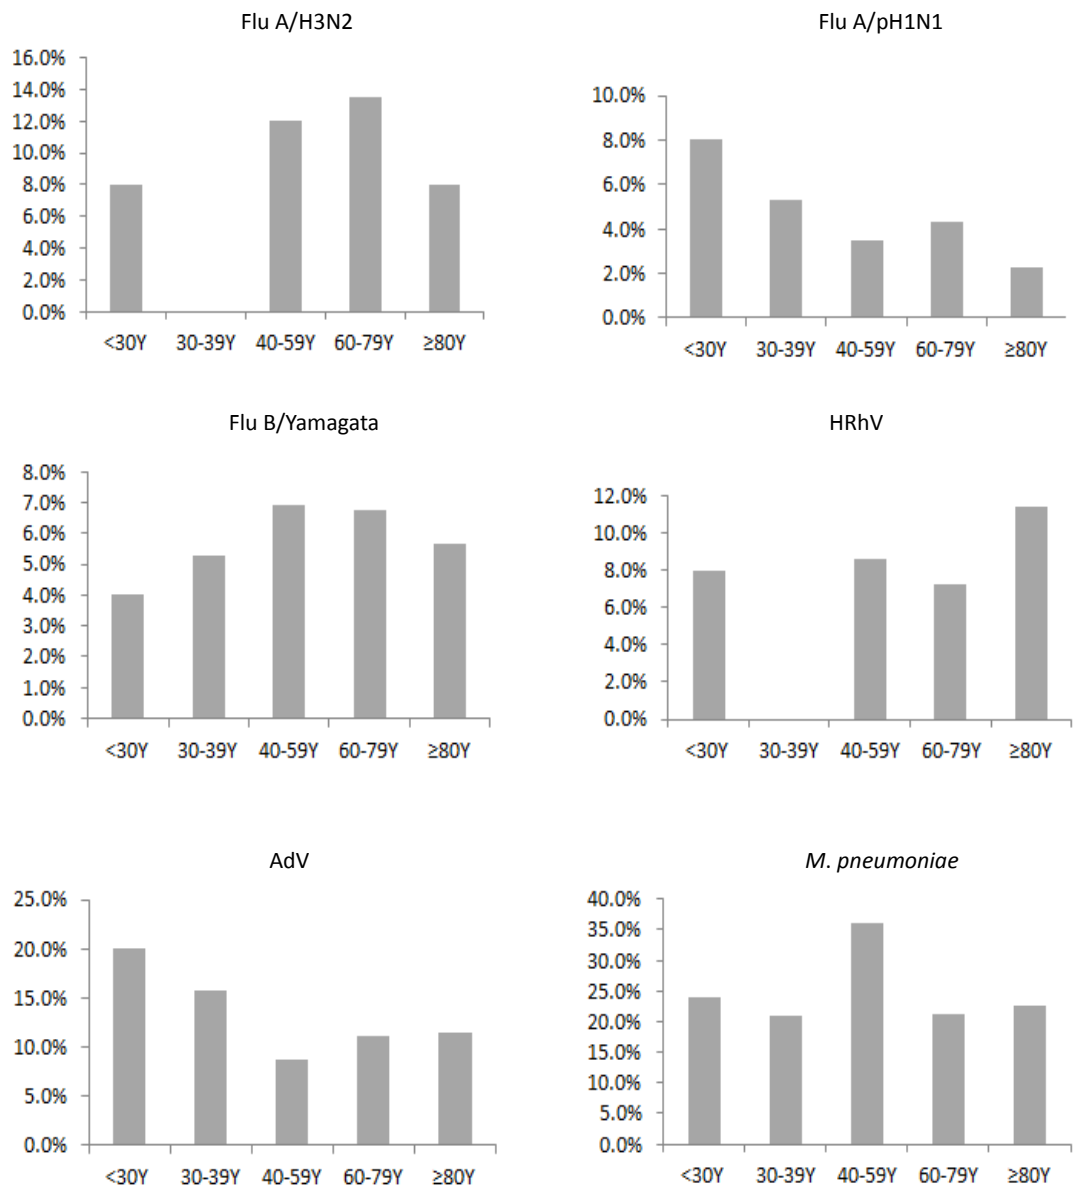

**Fig. 3** Detection rate of six main pathogens among SARI patients according to age groups in a surveillance hospital in Jinshan, Shanghai, April 2017 to March 2018

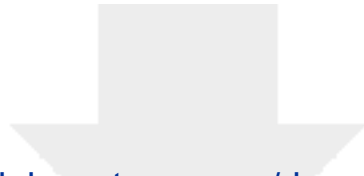

[Click here to access/download](#)

**Supporting Information**

[STROBE\\_checklist\\_v4\\_combined\\_PlosMedicine.docx](#)

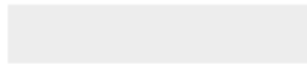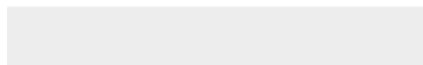

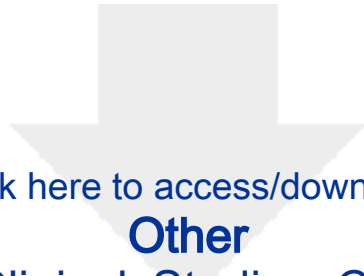

[Click here to access/download](#)

**Other**

[PLOSOne\\_Clinical\\_Studies\\_Checklist.docx](#)





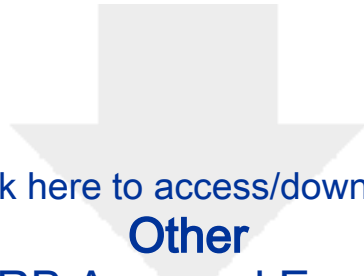

[Click here to access/download](#)

**Other**

[Shanghai CDC IRB Approval English Version.docx](#)

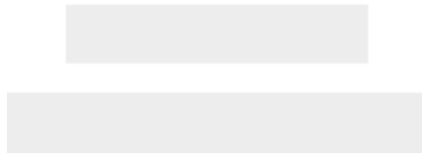

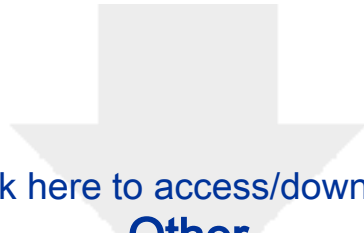

Click here to access/download

**Other**

Shanghai CDC IRB Approval CHN.pdf

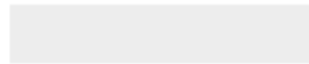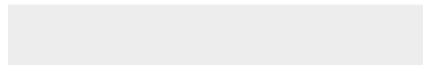

Supplement: pone.0248750.s004.pdf [file pone.0248750.s004.pdf]
