# Supplementary material for: Etiological and epidemiological characteristics of severe acute respiratory infection caused by multiple viruses and Mycoplasma pneumoniae in adult patients in Jinshan, Shanghai: A pilot hospital-based surveillance study
Source: PubMed Central journal article supplement (PMC7984646; doi:10.1371/journal.pone.0248750), 2021-03-22
Supplement: pone.0248750.s006.pdf [file pone.0248750.s006.pdf]

# PLOS ONE

## Etiological and Epidemiological Characteristics of Severe Acute Respiratory Infection Caused by Multiple Viruses and Mycoplasma Pneumoniae in Adult Patients in Jinshan, Shanghai: A Pilot Hospital-based Surveillance Study

--Manuscript Draft--

|                              |                                                                                                                                                                                                                                                                                                                                                                                                                                                                                                                                                                                                                                                                                                                                                                                                                                                                                                                                                                                                                                                                                                                                                                                                                                                                                                                                                                                                                                                                                                                                                                                                                                                                                                                                                                                                                                                                                                                                                                                                                                                                                                                                                                                                                                                                                                                                                                                                                                                                                                                                                                                                                                                                                                                                                                                                                                                                                                                                                                                                                                                                                                                                                                                                                                                                                                                       |
|------------------------------|-----------------------------------------------------------------------------------------------------------------------------------------------------------------------------------------------------------------------------------------------------------------------------------------------------------------------------------------------------------------------------------------------------------------------------------------------------------------------------------------------------------------------------------------------------------------------------------------------------------------------------------------------------------------------------------------------------------------------------------------------------------------------------------------------------------------------------------------------------------------------------------------------------------------------------------------------------------------------------------------------------------------------------------------------------------------------------------------------------------------------------------------------------------------------------------------------------------------------------------------------------------------------------------------------------------------------------------------------------------------------------------------------------------------------------------------------------------------------------------------------------------------------------------------------------------------------------------------------------------------------------------------------------------------------------------------------------------------------------------------------------------------------------------------------------------------------------------------------------------------------------------------------------------------------------------------------------------------------------------------------------------------------------------------------------------------------------------------------------------------------------------------------------------------------------------------------------------------------------------------------------------------------------------------------------------------------------------------------------------------------------------------------------------------------------------------------------------------------------------------------------------------------------------------------------------------------------------------------------------------------------------------------------------------------------------------------------------------------------------------------------------------------------------------------------------------------------------------------------------------------------------------------------------------------------------------------------------------------------------------------------------------------------------------------------------------------------------------------------------------------------------------------------------------------------------------------------------------------------------------------------------------------------------------------------------------------|
| <b>Manuscript Number:</b>    | PONE-D-20-19561R1                                                                                                                                                                                                                                                                                                                                                                                                                                                                                                                                                                                                                                                                                                                                                                                                                                                                                                                                                                                                                                                                                                                                                                                                                                                                                                                                                                                                                                                                                                                                                                                                                                                                                                                                                                                                                                                                                                                                                                                                                                                                                                                                                                                                                                                                                                                                                                                                                                                                                                                                                                                                                                                                                                                                                                                                                                                                                                                                                                                                                                                                                                                                                                                                                                                                                                     |
| <b>Article Type:</b>         | Research Article                                                                                                                                                                                                                                                                                                                                                                                                                                                                                                                                                                                                                                                                                                                                                                                                                                                                                                                                                                                                                                                                                                                                                                                                                                                                                                                                                                                                                                                                                                                                                                                                                                                                                                                                                                                                                                                                                                                                                                                                                                                                                                                                                                                                                                                                                                                                                                                                                                                                                                                                                                                                                                                                                                                                                                                                                                                                                                                                                                                                                                                                                                                                                                                                                                                                                                      |
| <b>Full Title:</b>           | Etiological and Epidemiological Characteristics of Severe Acute Respiratory Infection Caused by Multiple Viruses and Mycoplasma Pneumoniae in Adult Patients in Jinshan, Shanghai: A Pilot Hospital-based Surveillance Study                                                                                                                                                                                                                                                                                                                                                                                                                                                                                                                                                                                                                                                                                                                                                                                                                                                                                                                                                                                                                                                                                                                                                                                                                                                                                                                                                                                                                                                                                                                                                                                                                                                                                                                                                                                                                                                                                                                                                                                                                                                                                                                                                                                                                                                                                                                                                                                                                                                                                                                                                                                                                                                                                                                                                                                                                                                                                                                                                                                                                                                                                          |
| <b>Short Title:</b>          | Etiological and epidemiological characteristics of severe acute respiratory infection                                                                                                                                                                                                                                                                                                                                                                                                                                                                                                                                                                                                                                                                                                                                                                                                                                                                                                                                                                                                                                                                                                                                                                                                                                                                                                                                                                                                                                                                                                                                                                                                                                                                                                                                                                                                                                                                                                                                                                                                                                                                                                                                                                                                                                                                                                                                                                                                                                                                                                                                                                                                                                                                                                                                                                                                                                                                                                                                                                                                                                                                                                                                                                                                                                 |
| <b>Corresponding Author:</b> | JIAN LI<br>Ruijin Hospital, Shanghai Jiao Tong University, School of Medicine<br>Shanghai, CHINA                                                                                                                                                                                                                                                                                                                                                                                                                                                                                                                                                                                                                                                                                                                                                                                                                                                                                                                                                                                                                                                                                                                                                                                                                                                                                                                                                                                                                                                                                                                                                                                                                                                                                                                                                                                                                                                                                                                                                                                                                                                                                                                                                                                                                                                                                                                                                                                                                                                                                                                                                                                                                                                                                                                                                                                                                                                                                                                                                                                                                                                                                                                                                                                                                      |
| <b>Keywords:</b>             | Severe acute respiratory infection, sentinel surveillance, pathogen, epidemiology                                                                                                                                                                                                                                                                                                                                                                                                                                                                                                                                                                                                                                                                                                                                                                                                                                                                                                                                                                                                                                                                                                                                                                                                                                                                                                                                                                                                                                                                                                                                                                                                                                                                                                                                                                                                                                                                                                                                                                                                                                                                                                                                                                                                                                                                                                                                                                                                                                                                                                                                                                                                                                                                                                                                                                                                                                                                                                                                                                                                                                                                                                                                                                                                                                     |
| <b>Abstract:</b>             | <p><b>Background</b><br/>Severe acute respiratory infection (SARI) results in a tremendous disease burden worldwide. Available research on active surveillance among hospitalized adult patients suffering from SARI in China is limited. This pilot study aimed to identify associated etiologies and describe the demographic, epidemiological and clinical profiles of hospitalized SARI patients aged over 16 years in Jinshan, Shanghai.</p> <p><b>Methods</b><br/>Active surveillance was conducted at 1 sentinel hospital in Jinshan district, Shanghai, from April 2017 to March 2018. Hospitalized SARI patients aged more than 16 years were enrolled, and nasopharyngeal swabs were collected within 24 hours of admission and tested for multiple respiratory viruses (including 18 common viruses) and Mycoplasma pneumoniae ( M. pneumoniae ) with real-time polymerase chain reaction. Demographic, epidemiological and clinical information was obtained from case report forms.</p> <p><b>Results</b><br/>In total, 397 SARI patients were enrolled; the median age was 68 years, and 194 (48.9%) patients were male . A total of 278 (70.0%) patients had at least one underlying chronic medical condition . The most frequent symptoms were cough (99.2%) and sputum production (88.4%). The median duration of hospitalization was 10 days. A total of 250 infection patients (63.0%) were positive for at least one pathogen, of whom 198 (49.9%) were positive for a single pathogen and 52 (13.1%) were positive for multiple pathogens. The pathogens identified most frequently were M. pneumoniae (23.9%, 95/397), followed by adenovirus (AdV) (11.6%, 46/397), influenza virus A/H3N2 (Flu A/H3N2) (11.1%, 44/397), human rhinovirus (HRhV) (8.1%, 32/397), influenza virus B/Yamagata (Flu B/Yamagata) (6.3%, 25/397), pandemic influenza virus A/H1N1 (Flu A/pH1N1) (4.0%, 16/397), parainfluenza virus (PIV) type 1 (2.0%, 8/397), human coronavirus (HCoV) type NL63 (2.0%, 8/397), HCoV type 229E (1.5%, 6/397), HCoV type HKU1 (1.5%, 6/397), PIV type 3 (1.5%, 6/397), human metapneumovirus (HMPV) (1.5%, 6/397), PIV type 4 (1.3%, 5/397), HCoV type OC43 (1.0%, 4/397), influenza virus B/Victoria (Flu B/Victoria) (0.5%, 2/397), respiratory syncytial virus (RSV) type B (0.5%, 2/397), and human bocavirus (HBoV) (0.3%, 1/397). The seasonality of pathogen-confirmed SARI patients had a bimodal distribution, with the first peak in summer and the second peak in winter. Statistically significant differences were observed with respect to the rates of dyspnea, radiographically diagnosed pneumonia and the presence of at least one comorbidity in patients who were infected with only M. pneumoniae , AdV, HRhV, Flu A/H3N2, Flu A /pH1N1 or Flu B/Yamagata. The differences in the positivity rates of the above 6 pathogens among the different age groups were nonsignificant.</p> <p><b>Conclusions</b><br/>M. pneumoniae , AdV and Flu A/H3N2 were the main pathogens detected in hospitalized SARI patients aged more than 16 years in Jinshan district, Shanghai. Our findings highlight the importance of sustained multipathogen surveillance among SARI patients in sentinel hospitals, which can provide useful information on SARI etiologies,</p> |

|                               |                                                                                                                                                                                                                                                                                                                                                                                                                                                                                                                                                                                                                                                                                                                                                                                                                                                                                                                                                                                                                                                                                                                                                                                                                                                                                                                                                                                                                                                                                                                                                                                                                                                                                                                                                                                                                                                                                                                                                                                                                                                                                                                                                                                                                                                                                                                                                                                                                                                                                                                                                                                                                                                                                                                                                                                                                                                                                                                                                                                                                                                                                                                                                                                                                                                                                                                                                                                                                                                                                                                                                                                                                                                                       |
|-------------------------------|-----------------------------------------------------------------------------------------------------------------------------------------------------------------------------------------------------------------------------------------------------------------------------------------------------------------------------------------------------------------------------------------------------------------------------------------------------------------------------------------------------------------------------------------------------------------------------------------------------------------------------------------------------------------------------------------------------------------------------------------------------------------------------------------------------------------------------------------------------------------------------------------------------------------------------------------------------------------------------------------------------------------------------------------------------------------------------------------------------------------------------------------------------------------------------------------------------------------------------------------------------------------------------------------------------------------------------------------------------------------------------------------------------------------------------------------------------------------------------------------------------------------------------------------------------------------------------------------------------------------------------------------------------------------------------------------------------------------------------------------------------------------------------------------------------------------------------------------------------------------------------------------------------------------------------------------------------------------------------------------------------------------------------------------------------------------------------------------------------------------------------------------------------------------------------------------------------------------------------------------------------------------------------------------------------------------------------------------------------------------------------------------------------------------------------------------------------------------------------------------------------------------------------------------------------------------------------------------------------------------------------------------------------------------------------------------------------------------------------------------------------------------------------------------------------------------------------------------------------------------------------------------------------------------------------------------------------------------------------------------------------------------------------------------------------------------------------------------------------------------------------------------------------------------------------------------------------------------------------------------------------------------------------------------------------------------------------------------------------------------------------------------------------------------------------------------------------------------------------------------------------------------------------------------------------------------------------------------------------------------------------------------------------------------------|
|                               | epidemiology, and clinical characteristics.                                                                                                                                                                                                                                                                                                                                                                                                                                                                                                                                                                                                                                                                                                                                                                                                                                                                                                                                                                                                                                                                                                                                                                                                                                                                                                                                                                                                                                                                                                                                                                                                                                                                                                                                                                                                                                                                                                                                                                                                                                                                                                                                                                                                                                                                                                                                                                                                                                                                                                                                                                                                                                                                                                                                                                                                                                                                                                                                                                                                                                                                                                                                                                                                                                                                                                                                                                                                                                                                                                                                                                                                                           |
| <b>Order of Authors:</b>      | JIAN LI                                                                                                                                                                                                                                                                                                                                                                                                                                                                                                                                                                                                                                                                                                                                                                                                                                                                                                                                                                                                                                                                                                                                                                                                                                                                                                                                                                                                                                                                                                                                                                                                                                                                                                                                                                                                                                                                                                                                                                                                                                                                                                                                                                                                                                                                                                                                                                                                                                                                                                                                                                                                                                                                                                                                                                                                                                                                                                                                                                                                                                                                                                                                                                                                                                                                                                                                                                                                                                                                                                                                                                                                                                                               |
|                               | Can-Lei Song                                                                                                                                                                                                                                                                                                                                                                                                                                                                                                                                                                                                                                                                                                                                                                                                                                                                                                                                                                                                                                                                                                                                                                                                                                                                                                                                                                                                                                                                                                                                                                                                                                                                                                                                                                                                                                                                                                                                                                                                                                                                                                                                                                                                                                                                                                                                                                                                                                                                                                                                                                                                                                                                                                                                                                                                                                                                                                                                                                                                                                                                                                                                                                                                                                                                                                                                                                                                                                                                                                                                                                                                                                                          |
|                               | Tang Wang                                                                                                                                                                                                                                                                                                                                                                                                                                                                                                                                                                                                                                                                                                                                                                                                                                                                                                                                                                                                                                                                                                                                                                                                                                                                                                                                                                                                                                                                                                                                                                                                                                                                                                                                                                                                                                                                                                                                                                                                                                                                                                                                                                                                                                                                                                                                                                                                                                                                                                                                                                                                                                                                                                                                                                                                                                                                                                                                                                                                                                                                                                                                                                                                                                                                                                                                                                                                                                                                                                                                                                                                                                                             |
|                               | Yu-Long Ye                                                                                                                                                                                                                                                                                                                                                                                                                                                                                                                                                                                                                                                                                                                                                                                                                                                                                                                                                                                                                                                                                                                                                                                                                                                                                                                                                                                                                                                                                                                                                                                                                                                                                                                                                                                                                                                                                                                                                                                                                                                                                                                                                                                                                                                                                                                                                                                                                                                                                                                                                                                                                                                                                                                                                                                                                                                                                                                                                                                                                                                                                                                                                                                                                                                                                                                                                                                                                                                                                                                                                                                                                                                            |
|                               | Jian-Ru Du                                                                                                                                                                                                                                                                                                                                                                                                                                                                                                                                                                                                                                                                                                                                                                                                                                                                                                                                                                                                                                                                                                                                                                                                                                                                                                                                                                                                                                                                                                                                                                                                                                                                                                                                                                                                                                                                                                                                                                                                                                                                                                                                                                                                                                                                                                                                                                                                                                                                                                                                                                                                                                                                                                                                                                                                                                                                                                                                                                                                                                                                                                                                                                                                                                                                                                                                                                                                                                                                                                                                                                                                                                                            |
|                               | Shu-Hua Li                                                                                                                                                                                                                                                                                                                                                                                                                                                                                                                                                                                                                                                                                                                                                                                                                                                                                                                                                                                                                                                                                                                                                                                                                                                                                                                                                                                                                                                                                                                                                                                                                                                                                                                                                                                                                                                                                                                                                                                                                                                                                                                                                                                                                                                                                                                                                                                                                                                                                                                                                                                                                                                                                                                                                                                                                                                                                                                                                                                                                                                                                                                                                                                                                                                                                                                                                                                                                                                                                                                                                                                                                                                            |
|                               | Jian-Min Zhu                                                                                                                                                                                                                                                                                                                                                                                                                                                                                                                                                                                                                                                                                                                                                                                                                                                                                                                                                                                                                                                                                                                                                                                                                                                                                                                                                                                                                                                                                                                                                                                                                                                                                                                                                                                                                                                                                                                                                                                                                                                                                                                                                                                                                                                                                                                                                                                                                                                                                                                                                                                                                                                                                                                                                                                                                                                                                                                                                                                                                                                                                                                                                                                                                                                                                                                                                                                                                                                                                                                                                                                                                                                          |
| <b>Response to Reviewers:</b> | <p>Response to Specific Comments:</p> <p>1. Specimen collection and laboratory testing: This section need further clarification. Please specify the multiplex PCR used. Did the authors used method described in previous literatures or commercial kit?<br/> Answer: We thank for these suggestions and have made further clarification. The multiplex PCR used is the commercial kit. We added the data about multiplex PCR and made further clarification (see Page 7, line 154 to Page 8, line 156 in Revised Manuscript with Track Changes, the same below).<br/> Line 219 – 223: Not sure what the authors wish to convey, please rephrase for clarification.<br/> Answer: We are sorry and have rephrased these sentences (see Page 11, line232-236).</p> <p>2. Line 260 – 265: Not clear on what the authors' intention on these statement, please clarify.<br/> Answer: These sentences in line 260-265 mean to show that there were no significant differences of therapy between SARI patients with confirmed pathogen and those without confirmed pathogen. We have modified our text as advised (see Page 13, line 280-286).</p> <p>3. Line 295 – 299: This argument does not hold. These are not fair comparison since this study excluded children.<br/> Answer: This comment is appreciated highly. We deleted these sentences in line 295-298 following this comment, and revised the next sentence in line 298-299(see Page 15, line321-323).</p> <p>4. Ethical statement: This needs to be included in the Materials and Methods section and needs to include approval number.<br/> Answer: The ethical statement has been moved to the Materials and Methods section, and the approval number has been added (see Page 9, line 181-186).</p> <p>Response to Journal Requirements:</p> <p>1. Please ensure that your manuscript meets PLOS ONE's style requirements, including those for file naming. The PLOS ONE style templates can be found at <a href="https://journals.plos.org/plosone/s/file?id=wjVg/PLOSONe_formatting_sample_main_body.pdf">https://journals.plos.org/plosone/s/file?id=wjVg/PLOSONe_formatting_sample_main_body.pdf</a> and <a href="https://journals.plos.org/plosone/s/file?id=ba62/PLOSONe_formatting_sample_title_authors_affiliations.pdf">https://journals.plos.org/plosone/s/file?id=ba62/PLOSONe_formatting_sample_title_authors_affiliations.pdf</a><br/> Answer: We ensure that our manuscript meets the journal's style.</p> <p>2. In your methods and ethics statement, please state whether you obtained consent from parents or guardians of minors under 18 years old.<br/> Answer: We have stated that the consent from parents or guardians of those under 18 years old have been obtained in the section of "ethics statement" (see Page 9, line 184-186).</p> <p>3. PLOS ONE requires experimental methods to be described in enough detail to allow suitably skilled investigators to fully replicate and evaluate your study. See <a href="https://journals.plos.org/plosone/s/submission-guidelines#loc-materials-and-methods">https://journals.plos.org/plosone/s/submission-guidelines#loc-materials-and-methods</a> for more information.<br/> To comply with PLOS ONE submission guidelines, in your Methods section, please provide a more detailed description of your methodology, specifically about your respiratory pathogens 15 multiplex real-time RT-PCR, Flu A/B RT-PCR, and flu typing methods.<br/> Answer: We have provided a more detailed description of methodology in the section of specimen collection and laboratory testing as advised (see Page 7, line 142 to Page</p> |

8, line 166).

4. We note that you have indicated that data from this study are available upon request. PLOS only allows data to be available upon request if there are legal or ethical restrictions on sharing data publicly. For information on unacceptable data access restrictions, please see <http://journals.plos.org/plosone/s/data-availability#loc-unacceptable-data-access-restrictions>.

In your revised cover letter, please address the following prompts:

a) If there are ethical or legal restrictions on sharing a de-identified data set, please explain them in detail (e.g., data contain potentially identifying or sensitive patient information) and who has imposed them (e.g., an ethics committee). Please also provide contact information for a data access committee, ethics committee, or other institutional body to which data requests may be sent.

b) If there are no restrictions, please upload the minimal anonymized data set necessary to replicate your study findings as either Supporting Information files or to a stable, public repository and provide us with the relevant URLs, DOIs, or accession numbers. Please see <http://www.bmj.com/content/340/bmj.c181.long> for guidelines on how to de-identify and prepare clinical data for publication. For a list of acceptable repositories, please see <http://journals.plos.org/plosone/s/data-availability#loc-recommended-repositories>.

We will update your Data Availability statement on your behalf to reflect the information you provide.

Answer: We agree to provide the minimal anonymized data set as Supporting Information files for data-sharing. And Data Availability statement has been updated, and you can revise it on our behalf.

5. Your ethics statement should only appear in the Methods section of your manuscript. If your ethics statement is written in any section besides the Methods, please move it to the Methods section and delete it from any other section. Please ensure that your ethics statement is included in your manuscript, as the ethics statement entered into the online submission form will not be published alongside your manuscript.

Answer: We have moved the ethics statement to the Methods sections of manuscript.

6. Please include captions for your Supporting Information files at the end of your manuscript, and update any in-text citations to match accordingly. Please see our Supporting Information guidelines for more information: <http://journals.plos.org/plosone/s/supporting-information>.

Answer: We have added captions for the Supporting Information files at the end of the revised manuscript (see Page 20, line 420-421), and updated in-text citations as advised.

Response to Reviewer #1' comments:

Reviewer #1: Dear Author

Thank you for the very nice work, indeed it generated comprehensive and very informative data. The active surveillance is much appreciated. I understand that such surveillance produced a lot of data which I believe is a big challenge to make the best out of it which you did through a very nice data presentation and analysis. In addition SARI surveillance in adult is not addressed much in the literature especially in developing areas. Moreover it seems that you described surveillance from a special geographical area characterized with unique pattern of SARI surveillance especially for the influenza B as well as the summer seasonal influenza H3 peak.

Comments:

1- The 1st letters in the title are to be capitalized.

Answer: The first letters in the title have been capitalized as advised.

Abstract

1- In the abstract line 71-73, the statement "No significant difference among ... rate of main pathogens." is unclear, please rephrase.

Answer: We have modified the statement of this sentence (see Page 3, line 62-64).

Methods

2- Line 132 please insert a reference for Sari definition.

Answer: We thank for this suggestion. A reference for SARI definition has been inserted (see Page 6, line 123).

3- Please specify details of sample collection: oropharyngeal or nasopharyngeal or

both, type of the swabs used and manufacturer, VTM inhouse prepared or commercial and it's manufacturer, duration of sample storage till transportation.

Answer: We have specified the details of sample collection including the type of swab and manufacturer. The information of VTM manufacturer and duration of sample storage till transportation have been provided as advised (see Page 7, line 142-147).

4- Please specify the type of kits used : catalogue number, manufacturer or if it is inhouse made, provide primers and reagent used along with the reference.

Answer: The information of PCR kits has been specified (see Page 7, line 154 to Page 8, line 156). Both of the primers and reagent came from the PCR kit. The testing process of PCR was conducted according to the manufacturer's protocols.

5- Study subjects: Are the patients admitted in ICU or regular wards?

Answer: The patients in this study included those admitted in ICU, respiratory medicine department and general wards, which was specified in the Study Subject section (see Page 6, line 118-119).

6- Line 158-159 "Specimens were lysed at strongly denaturing conditions to deactivate RNases" please provide a reference as I believe that harsh conditions may affect the target fragile viral RNA.

Answer: We have followed the comment, deleted the term of "strongly" and rephrased the sentence in line 158, also, a reference has been provided according to your suggestion (see Page 7, line 151-152).

7- Line 160: using term "contaminant" is incorrect

Answer: Another reviewer thought that it was unnecessary to keep the sentence which was located in line 159-160, namely, "After adding alcohol and loading lysates onto the QIAamp spin column, viral RNA and DNA combined to the QIAamp silica membrane while contaminants passed through". We followed this suggestion and deleted this sentence which included the term of "contaminant".

#### Results

8- Line 237: it is not clear where did these numbers came from (20/95, 21/94) and how can the P value show significant difference between these very close findings. Please recheck and clarify.

Answer: The denominator (95,94) were the total number of monitoring patients in summer(Jun-Aug) and autumn(Sep-Nov) respectively, and the numerator(20,21) were the positive number of patients in summer(Jun-Aug) and autumn(Sep-Nov) respectively. As for the P value, we are sorry for negligence. The P value should be 0.83 and the difference is not significant. Thanks for point to this mistake, we have corrected it (see Page 12, line 254).

9- Line 239 and 240 please clarify what this P value indicates.

Answer: We have clarified the significance of this P value (see Page 12, line 254-256).

#### Discussion

10- For the significant P values, you addressed the comorbidities in the discussion. What about the dyspnea and the radiologic examination.

Answer: We thanks for this comment. We have addressed the dyspnea and presence of radiographic diagnosis of pneumonia in the discussion (see Page 16, line 344 to Page 17, line 364).

11- Findings in the result section line 224 and 225 were not discussed regarding the Xray finding in the mycoplasma and rhino causing dyspnea.

Answer: We thanks for this comment and have discussed them accordingly (see Page 16, line 344 to Page 17, line 357).

12- In the discussion, comparison of the patients from Madagascar and yours is irrelevant as they enrolled pediatric patients that were excluded from your study.

Answer: This comment is appreciated and we deleted this comparison in the discussion.

13- Line 311: You discuss cough as being the most common symptom, this is obvious as it in part of the inclusion criteria. Rather, you should address elaboration about the pneumonia and bronchiolitis.

Answer: We are sorry for no discussing the pneumonia in discussion on account of space limitation of original manuscript. In the revised paper, we have discussed the pneumonia and bronchiolitis following the suggestion (see Page 16, line 340-344).

Figures and tables:

14- Figure 3: Percentage of the y axis is not clear (is it from the total enrolled or from the positive cases only). Please provide your definition of the detection rate.

Answer: We have clarified the significance of y axis and provided the definition of the detection rate in Fig 2 and Fig3.

15- Table 5: please draw lines between columns as it is confusing.

Answer: We have drawn lines between columns in all 5 tables according to this comment(see Table 5).

16- Table 4: Title is not informative. Significant P values need further analysis to detect the significance is between which 2 groups.

Answer: Title of table 4 has been revised (see Page 31, line 609-610). As for 3 variables with significant P value, we conducted the pairwise comparison (see Page 32, line 611-615). Also, we revised the statistics section accordingly (see Page 9, line 177-178).

17- Table3: It is not clear what is meant by "Chest radiographic exam", please clarify especially that it shows significant P value and should be addressed in the discussion.

Answer: It means the acceptance of chest radiographic exam, we have revised it and clarified especially in bold font in table 3. And we addressed it in the discussion (see Page 17, line 357-364).

18- In table 2 : Percent is done from the total enrolled cases or from the positive ones. Please clarify and add the total number at the end.

Answer: Percent refers to the frequency of positive etiology divided by the total enrolled samples (397 cases). We have provided the explanation for it under the table 2 and added the total number at the end (see Page 29, line 590-591).

GENERAL:

19- Please specify that the surveillance addresses the community acquired infections.

Answer: We have specified this important significance of surveillance system in the Background section (see Page 5, line 99-101).

20- When you mention "Presence of radiographic diagnosis of pneumonia" you mean, lobar pneumonia denoting mostly bacterial origin, or atypical pneumonia denoting viral or atypical bacterial origin (Mycoplasma). These details need to be mentioned especially for the negative cases as they may indicate other non-tested bacterial etiology.

Answer: We are sorry that our case report form is the standard structural questionnaire, and it just collected the result whether has the presence of radiographic diagnosis of pneumonia, and can not show lobar pneumonia or atypical pneumonia. Meanwhile, the pathogens tested in this piloting study only covered common respiratory viruses and Mycoplasma pneumonia, and did not include respiratory bacterium. We agreed this comment and we address it in the limitation section (see Page 19, line 400-408).

21- Some sentences are ambiguous and need to be rephrased or corrected:

a. Line 149

Answer: The sentence in line 149 has been revised (see Page 7, line 139-140).

b. Line 188: remove "positive"

Answer: The term of "positive" in line 188 has been removed (see Page 9, line 190).

c. Line 191

Answer: The sentence in line 191 has been revised (see Page 9, line 194-195).

d. Line 273-274

Answer: The sentence in line 273-274 has been revised (see Page 14, line 295-297).

e. Line 295

Answer: The previous comment thought the sentence in line 295 did not hold, so we delete this sentence in line295-298.

f. Line 323

Answer: The "viral respiratory SARI" in line 323 has been changed to "viral SARI" (see Page 18, line 376).

g. Line 341

Answer: The sentence in line 341 has been revised (see Page 19, line 397-398).

h. Line 345

Answer: The sentence in line 345 has been revised (see Page 19, line 404-407).



Recommendations:

1- The title include many details that can be removed as the age group and the study period

Answer: We deleted the study period (April 2017 to March 2018) from the title following the recommendation. Meanwhile, we respect the editor's suggestion about this point. Since SARI surveillance in adults is not addressed much in the literatures especially in developing areas, we think it'd better to keep 'adult' in the title to show the difference from other studies.

2- Seasonality is better described in Epidemiologic weeks (Epi-weeks)

Answer: We respect this recommendation and it is accepted that seasonality can be described in both weeks and months. Some studies about SARI surveillance described seasonality in months, such as reference of 10 and 20. Also, our piloting study only last for 12 months and did not include enough patients. In the case of relatively small sample size of patients with confirmed pathogens, the use of weeks will make the seasonality character can not be better displayed. So we thought it is better to describe seasonality in months in order to show the characteristics of seasonality of SARI clearly.

Response to Reviewer #2' comments:

Reviewer #2: The authors described the etiological and epidemiological characters of severe acute respiratory infection caused by multiple viruses and mycoplasma pneumoniae in adult patients in Jinshan of Shanghai, April 2017 to March 2018. So before publication there are some points need to revise as following:-

Major questions Must be clarified:-

1- Why did the authors not represent the values of real time PCR / RT-PCR for the detected pathogens as an indicator for the load of different pathogens and if there are variations among their load in relation to seasonal variation?

Answer: The PCR kit this study used is a qualitative detection kit. The detecting results were judged by Tm value of various pathogens according to melting curve. The kit didn't provide the quantitative value for the load of different pathogens. So, we are sorry that we can't state if there are variations among loads in relation of seasonal variation. We have clarified the qualitative characteristic of PCR kit in the manuscript following in this comment (see Page 7, line 154 to Page 8, line 156).

2- Only pathogens from males (173 positive cases) were statistically analyzed in relation to different variants such as type of pathogen, clinical and diagnostic parameters, age.....etc Why did not authors do the same data analysis for female samples (77 positive cases) as in table 4? Also, Table 1 based mainly on male cases (194) and no data concerning the female (203), why?

Answer: Please allow us to clarify these problems. Both of the differences between males and females for the proportions in table 4 and table 1 have been analyzed, and initially, we omitted to display the information of female patients on consideration of controlling the length of table. We have added a row to show the female information in table 1 and table 4.

3- Among 19 pathogens have been detected authors decided to focus on only 6 pathogens although other studies stated the predominance of other pathogens such as RSV?

Answer: This study detected 17 kinds of pathogens, in which the number of six pathogens exceeds 10. So we focus on these 6 main pathogens as the number of other seven pathogens all was fewer than 10. Table 2 described all detected pathogens. We have clarified this in the discussion (see Page 15, line 313-319).

Minor comments

1-The manuscript should be revised carefully for typographical errors.

Answer: We have revised carefully for typographical error of the manuscript.

Abstract

2-abbreviations in line 71 should be defined at its first appearance as in line 66 then use the abbreviations

Answer: The names of viruses in line 71 have been defined with their full names at their first appearance (see Page 2, line 38 and Page 3, line 49-52). Other abbreviations in the manuscript have also been checked and revised.

3-lines 66-67 only 217 pathogens reported while in line 63 they are 250, could you mention the other type of etiological agent and its frequency.

Answer: 217 pathogens in lines 66-67 refers to the total frequency of 4 main pathogens, and 250 in line 63 is the total number of patients who were identified as at

least 1 pathogen. We have followed this suggestion and added the other type of etiological agents and their frequency in the abstract (see Page 3, line 51-57).

**Background**

4-line 100:- "owing to the lack of gold standard methods to swiftly determine etiological diagnoses" change to "owing to the lack of gold standard diagnostic methods to swiftly determine etiological agents"

Answer: We thanks for this suggestion and revised this sentence accordingly(see Page 4, line 84-85).

**Materials and methods**

5-Line 133:- "≥38°C, cough, with onset within the last 10 days and require hospitalization" change to "≥38°C, cough onset within the last 10 days and require hospitalization"

Answer: We thanks for this suggestion and revised this sentence accordingly (see Page 6, line 122-123).

6-Lines 137-138:- "vaccination (vaccinating influenza vaccine during 1 year before illness onset, vaccinating pneumococcal conjugate vaccine)" change to "vaccination (receiving influenza vaccine during 1 year before illness onset,and pneumococcal conjugate vaccine)"

Answer: We thanks for this suggestion and revised this sentence accordingly (see Page 6, line 127-128).

7-Line 149:- "149 information that could identify the identification of patients was masked during or after data" change to "149 information that could identify the personality of patients was masked during or after data"

Answer: We thanks for this suggestion and revised this sentence accordingly (see Page 7, line 139-140).

8-Line 157:- "viral RNA and DNA using the QIAamp Viral RNA Mini Kit (Qiagen, Hilden, Germany) following " change to "viral RNA and DNA using the QIAamp Viral RNA/DNA Mini Kit (Qiagen, Hilden, Germany) following"

Answer: We are sorry for this negligence and revised this sentence according to the suggestion (see Page 7, line 148-150).

9-Lines 161-162:- "Total nucleic acid extracts were further processed by multiplex real-time reverse transcription" change to "Viral nucleic acid extracts were further processed by multiplex real-time reverse transcription" since you used kit for viral nucleic acid (RNA or DNA)

Answer: We thanks for this suggestion and revised this sentence accordingly(see Page 7, line 153-154).

10-Lines 163-163:- "Respiratory pathogens 15 multiplex real-time RT-PCR diagnostic strategy was adopted to detect PIV (types 1, ....." change to "The multiplex real-time RT-PCR diagnostic strategy was adopted to detect 15 respiratory pathogens, PIV (types 1, ....."

Answer: We thanks for this suggestion and revised this sentence following the suggestion (see Page 7, line 154 to Page 8, line 156).

**Results**

11-As general when you describe the results please make full description of the full cases either positive or not and do not leave unclear such as line 212 you mentioned 382 cases and ignored the residue 15 cases and this was repeated all over the manuscript, do not leave anything for guessing.

Answer: We thank for this suggestion, and have tried our best to clarify these unclear descriptions all over the manuscript as advised (see Page 9, line 191-197; Page 10, line 199-200; Page 11, line 222-225; Page 13, line 277-280 ).

12-Lines 199-203:- Authors described the frequency and type of pathogens,however in compare to table 2 there is confusion concerning the pathogen frequency as in text 198 singl and 52 multiple, while later on the number will be 232 and in table 312, how can this occur? please clarify this.

Answer: Number of 198 and 52 in line 199 were the number of patients with single and multiple infections, respectively. Numbers from line 201 to line 203 including 95 (M. pneumoniae), 46 (AdV), 44 (Flu A/H3N2), 32 (HRhV), 25 (Flu B/Yamagata) represent the frequency of identified pathogen which was detected most frequently, and their meaning was different from that in line 199. Numbers from the 3rd row( 16 for Flu A/pH1N1) to the 25th row(95 for M. pneumoniae) in table 2 also represent the frequency of identified pathogens and their total number equals to 312. We have revised the corresponding description in section of etiology (see Page 10, line 206-214), and added the explanation for frequency under the table 2.

|                                                                                                                                                                                                                                                                                                                                                                                                                                                                                                     |                                                                                                                                                                                                                                                                                                                                                                                                                                                                                                                                                                                                                                                                                                                                                                                                                                                                                                                                                                                                                                                                                                                                                                                                                                                                                                                                                                                                                                                                                                                                                                                                                                                                                                                                                                                                                                                                                                                                                                                                                                                                                                                                                                                                                                                                                                                                                                                                                                                                                                                                                                                                                                        |
|-----------------------------------------------------------------------------------------------------------------------------------------------------------------------------------------------------------------------------------------------------------------------------------------------------------------------------------------------------------------------------------------------------------------------------------------------------------------------------------------------------|----------------------------------------------------------------------------------------------------------------------------------------------------------------------------------------------------------------------------------------------------------------------------------------------------------------------------------------------------------------------------------------------------------------------------------------------------------------------------------------------------------------------------------------------------------------------------------------------------------------------------------------------------------------------------------------------------------------------------------------------------------------------------------------------------------------------------------------------------------------------------------------------------------------------------------------------------------------------------------------------------------------------------------------------------------------------------------------------------------------------------------------------------------------------------------------------------------------------------------------------------------------------------------------------------------------------------------------------------------------------------------------------------------------------------------------------------------------------------------------------------------------------------------------------------------------------------------------------------------------------------------------------------------------------------------------------------------------------------------------------------------------------------------------------------------------------------------------------------------------------------------------------------------------------------------------------------------------------------------------------------------------------------------------------------------------------------------------------------------------------------------------------------------------------------------------------------------------------------------------------------------------------------------------------------------------------------------------------------------------------------------------------------------------------------------------------------------------------------------------------------------------------------------------------------------------------------------------------------------------------------------------|
|                                                                                                                                                                                                                                                                                                                                                                                                                                                                                                     | <p>13-lines 213-215:- "Thirty-two SARI patients and 30 patients had exposure of contacting with patients with fever and respiratory symptoms and contacting with live poultry during 2 weeks before their illness onset, respectively" change to "Thirty-two SARI patients had exposures with fever and respiratory symptoms patients while 30 SARI patients contacted with live poultry during 2 weeks before their illness onset"</p> <p>Answer: We thanks for this suggestion and revised this sentence following the suggestion (see Page 11, line 225-227).</p> <p>Tables</p> <p>1- Table 1 1st row change " All SARI SARI patient with confirmed pathogens SARI patient without confirmed pathogens" to "All with confirmed pathogens without confirmed pathogens" and add SARI patient above as another row.</p> <p>Answer: We have revised the 1st row of Table 1 and added SARI patient above as another row following this suggestion (see Table1).</p> <p>2- Table 2 1st clonumn please change "viral etiology" to "etiology" only because there is a bacteria also mentioned there.</p> <p>Answer: We are sorry for this negligence and have changed it according to the suggestion (see Table 2).</p> <p>3- Table 3 1st row change " All SARI SARI patient with confirmed pathogens SARI patient without confirmed pathogens" to "All with confirmed pathogens without confirmed pathogens" and add SARI patient above as another row. Visiting a live poultry market and Contact with live poultry in table 3 looks the same where in table 4 it become one catogery Contact with live poultry.</p> <p>Answer: We have revised the 1st row of Table 3 and added SARI patient above as another row following this suggestion, so does the Table 5. Contact with live poultry included contacting with live poultry at home and other place (such as live poultry market), so it is different from visiting a live poultry market. Since the number of patients visiting a live poultry market was just 3 cases, and it only included 1 case with single-infected M. pneumoniae positivity and 1 case with single-infected AdV positivity, the third case belonged to multiple infections, so the initial table 4 didn't analyze this variable. We have analyzed it in table 4 according to this comment (see Table 4).</p> <p>Figures</p> <p>The presented pathogens in Fig 1-3 based only on male SARI cases with confirmed pathogens or included all pathogens from male and female cases.</p> <p>Answer: The pathogens in Fig1-3 based on all SARI cases with confirmed pathogens including male and female cases.</p> |
| <b>Additional Information:</b>                                                                                                                                                                                                                                                                                                                                                                                                                                                                      |                                                                                                                                                                                                                                                                                                                                                                                                                                                                                                                                                                                                                                                                                                                                                                                                                                                                                                                                                                                                                                                                                                                                                                                                                                                                                                                                                                                                                                                                                                                                                                                                                                                                                                                                                                                                                                                                                                                                                                                                                                                                                                                                                                                                                                                                                                                                                                                                                                                                                                                                                                                                                                        |
| <b>Question</b>                                                                                                                                                                                                                                                                                                                                                                                                                                                                                     | <b>Response</b>                                                                                                                                                                                                                                                                                                                                                                                                                                                                                                                                                                                                                                                                                                                                                                                                                                                                                                                                                                                                                                                                                                                                                                                                                                                                                                                                                                                                                                                                                                                                                                                                                                                                                                                                                                                                                                                                                                                                                                                                                                                                                                                                                                                                                                                                                                                                                                                                                                                                                                                                                                                                                        |
| <p><b>Financial Disclosure</b></p> <p>Enter a financial disclosure statement that describes the sources of funding for the work included in this submission. Review the <a href="#">submission guidelines</a> for detailed requirements. View published research articles from <a href="#">PLOS ONE</a> for specific examples.</p> <p>This statement is required for submission and <b>will appear in the published article</b> if the submission is accepted. Please make sure it is accurate.</p> | <p>This work was supported by the Research Project of Shanghai Municipal Health Commission (201940428) for Can-Lei Song and the Infectious Disease and Epidemiology Project of the 6th Jinshan District Medical Key Specialty Construction (JSZK2019B05) for Shu-Hua Li . The funder had no role in study design, data collection and analysis, decision to publish or preparation of manuscript.</p>                                                                                                                                                                                                                                                                                                                                                                                                                                                                                                                                                                                                                                                                                                                                                                                                                                                                                                                                                                                                                                                                                                                                                                                                                                                                                                                                                                                                                                                                                                                                                                                                                                                                                                                                                                                                                                                                                                                                                                                                                                                                                                                                                                                                                                  |



**Unfunded studies**

Enter: *The author(s) received no specific funding for this work.*

**Funded studies**

Enter a statement with the following details:

- Initials of the authors who received each award
- Grant numbers awarded to each author
- The full name of each funder
- URL of each funder website
- Did the sponsors or funders play any role in the study design, data collection and analysis, decision to publish, or preparation of the manuscript?
- **NO** - Include this sentence at the end of your statement: *The funders had no role in study design, data collection and analysis, decision to publish, or preparation of the manuscript.*
- **YES** - Specify the role(s) played.

\* typeset

**Competing Interests**

Use the instructions below to enter a competing interest statement for this submission. On behalf of all authors, disclose any [competing interests](#) that could be perceived to bias this work—acknowledging all financial support and any other relevant financial or non-financial competing interests.

This statement **will appear in the published article** if the submission is accepted. Please make sure it is accurate. View published research articles from [PLOS ONE](#) for specific examples.

The authors have declared that no competing interests exist.

**NO authors have competing interests**

Enter: *The authors have declared that no competing interests exist.*

**Authors with competing interests**

Enter competing interest details beginning with this statement:

*I have read the journal's policy and the authors of this manuscript have the following competing interests: [insert competing interests here]*

\* typeset

**Ethics Statement**

Enter an ethics statement for this submission. This statement is required if the study involved:

- Human participants
- Human specimens or tissue
- Vertebrate animals or cephalopods
- Vertebrate embryos or tissues
- Field research

Write "N/A" if the submission does not require an ethics statement.

General guidance is provided below. Consult the [submission guidelines](#) for detailed instructions. **Make sure that all information entered here is included in the Methods section of the manuscript.**

This study belonged to the part of hospital-based surveillance program of SARI of Shanghai, and approved by the ethical review committee of the Shanghai Municipal Center for Disease Control and Prevention. Written informed consent was obtained from patients or proxies before enrollment.

**Format for specific study types**

**Human Subject Research (involving human participants and/or tissue)**

- Give the name of the institutional review board or ethics committee that approved the study
- Include the approval number and/or a statement indicating approval of this research
- Indicate the form of consent obtained (written/oral) or the reason that consent was not obtained (e.g. the data were analyzed anonymously)

**Animal Research (involving vertebrate animals, embryos or tissues)**

- Provide the name of the Institutional Animal Care and Use Committee (IACUC) or other relevant ethics board that reviewed the study protocol, and indicate whether they approved this research or granted a formal waiver of ethical approval
- Include an approval number if one was obtained
- If the study involved *non-human primates*, add *additional details* about animal welfare and steps taken to ameliorate suffering
- If anesthesia, euthanasia, or any kind of animal sacrifice is part of the study, include briefly which substances and/or methods were applied

**Field Research**

Include the following details if this study involves the collection of plant, animal, or other materials from a natural setting:

- Field permit number
- Name of the institution or relevant body that granted permission

**Data Availability**

Authors are required to make all data underlying the findings described fully available, without restriction, and from the time of publication. PLOS allows rare exceptions to address legal and ethical concerns. See the [PLOS Data Policy](#) and [FAQ](#) for detailed information.

No - some restrictions will apply

A Data Availability Statement describing where the data can be found is required at submission. Your answers to this question constitute the Data Availability Statement and **will be published in the article**, if accepted.

**Important:** Stating 'data available on request from the author' is not sufficient. If your data are only available upon request, select 'No' for the first question and explain your exceptional situation in the text box.

Do the authors confirm that all data underlying the findings described in their manuscript are fully available without restriction?

**Describe where the data may be found in full sentences. If you are copying our sample text, replace any instances of XXX with the appropriate details.**

- If the data are **held or will be held in a public repository**, include URLs, accession numbers or DOIs. If this information will only be available after acceptance, indicate this by ticking the box below. For example: *All XXX files are available from the XXX database (accession number(s) XXX, XXX).*
- If the data are all contained **within the manuscript and/or Supporting Information files**, enter the following:  
*All relevant data are within the manuscript and its Supporting Information files.*
- If neither of these applies but you are able to provide **details of access elsewhere**, with or without limitations, please do so. For example:

*Data cannot be shared publicly because of [XXX]. Data are available from the XXX Institutional Data Access / Ethics Committee (contact via XXX) for researchers who meet the criteria for access to confidential data.*

*The data underlying the results presented in the study are available from (include the name of the third party*

All relevant data are contained within the manuscript and its Supporting Information files.

|                                                                                                                                                                                                                                         |  |
|-----------------------------------------------------------------------------------------------------------------------------------------------------------------------------------------------------------------------------------------|--|
| <p><i>and contact information or URL).</i></p> <ul style="list-style-type: none"><li>• This text is appropriate if the data are owned by a third party and authors do not have permission to share the data.</li></ul> <p>* typeset</p> |  |
| Additional data availability information:                                                                                                                                                                                               |  |



1 **Etiological and Epidemiological Characteristics of Severe Acute Respiratory**  
2 **Infection Caused by Multiple Viruses and *Mycoplasma Pneumoniae* in Adult**  
3 **Patients in Jinshan, Shanghai: A Pilot Hospital-based Surveillance Study**

4 Jian Li<sup>1†</sup>, Can-Lei Song<sup>2†</sup>, Tang Wang<sup>2†</sup>, Yu-Long Ye<sup>3</sup>, Jian-Ru Du<sup>3</sup>, Shu-Hua Li<sup>2</sup>, Jian-Min Zhu<sup>2</sup>

5 † These authors contributed equally to this work.

6 <sup>1</sup>*Clinical Research Center, Ruijin Hospital, Shanghai Jiao Tong University School of Medicine,*  
7 *Shanghai, China*

8 <sup>2</sup>*Department of Acute Infectious Diseases Control, Jinshan District Center for Diseases Control*  
9 *and Prevention, Shanghai, China*

10 <sup>3</sup>*Department of Microbiology, Jinshan District Center for Diseases Control and Prevention,*  
11 *Shanghai, China*

12 **Email addresses:**

13 Jian Li : nlijian@163.com

14 Can-Lei Song: 629309340@163.com

15 Tang Wang: 1090595528@qq.com

16 Yu-Long Ye: yeyulong99@163.com

17 Jian-Ru Du: 646947222@qq.com

18 Shu-Hua Li: hsli167@163.com

19 Jian-Min Zhu: zhujm12@163.com

20 **Corresponding author:**

21 Dr. Jian Li: Clinical Research Center, Ruijin Hospital, Shanghai Jiao Tong University School of

22 Medicine, 197 Ruijin Er Rd, Huangpu District, Shanghai, China, 200025

23 Dr. Jian-Min Zhu: Department of Acute Infectious Diseases Control, Jinshan District Center for  
24 Diseases Control and Prevention, 94 Weisheng Rd, Jinshan District, Shanghai, China, 201599

25

## 26 **Abstract**

### 27 **Background**

28 Severe acute respiratory infection (SARI) results in a tremendous disease burden worldwide.  
29 Available research on active surveillance among hospitalized adult patients suffering from SARI  
30 in China is limited. This pilot study aimed to identify associated etiologies and describe the  
31 demographic, epidemiological and clinical profiles of hospitalized SARI patients aged over 16  
32 years in Jinshan, Shanghai.

### 33 **Methods**

34 Active surveillance was conducted at 1 sentinel hospital in Jinshan district, Shanghai, from April  
35 2017 to March 2018. Hospitalized SARI patients aged more than 16 years were enrolled, and  
36 nasopharyngeal swabs were collected within 24 hours of admission and tested for multiple  
37 respiratory viruses (including 18 common viruses) and *Mycoplasma pneumoniae* (*M. pneumoniae*)  
38 with real-time polymerase chain reaction. Demographic, epidemiological and clinical information  
39 was obtained from case report forms.

### 40 **Results**

41 In total, 397 SARI patients were enrolled; the median age was 68 years, and 194 (48.9%) patients  
42 were male. A total of 278 (70.0%) patients had at least one underlying chronic medical condition.  
43 The most frequent symptoms were cough (99.2%) and sputum production (88.4%). The median  
44 duration of hospitalization was 10 days. A total of 250 infection patients (63.0%) were positive for

45 at least one pathogen, of whom 198 (49.9%) were positive for a single pathogen and 52 (13.1%)  
46 were positive for multiple pathogens. The pathogens identified most frequently were *M.*  
47 *pneumoniae* (23.9%, 95/397), followed by adenovirus (AdV) (11.6%, 46/397), influenza virus  
48 A/H3N2 (Flu A/H3N2) (11.1%, 44/397), human rhinovirus (HRhV) (8.1%, 32/397), influenza  
49 virus B/Yamagata (Flu B/Yamagata) (6.3%, 25/397), pandemic influenza virus A/H1N1 (Flu  
50 A/pH1N1) (4.0%, 16/397), parainfluenza virus (PIV) type 1 (2.0%, 8/397), human coronavirus  
51 (HCoV) type NL63 (2.0%, 8/397), HCoV type 229E (1.5%, 6/397), HCoV type HKU1 (1.5%,  
52 6/397), PIV type 3 (1.5%, 6/397), human metapneumovirus (HMPV) (1.5%, 6/397), PIV type 4  
53 (1.3%, 5/397), HCoV type OC43 (1.0%, 4/397), influenza virus B/Victoria (Flu B/Victoria) (0.5%,  
54 2/397), respiratory syncytial virus (RSV) type B (0.5%, 2/397), and human bocavirus (HBoV)  
55 (0.3%, 1/397). The seasonality of pathogen-confirmed SARI patients had a bimodal distribution,  
56 with the first peak in summer and the second peak in winter. Statistically significant differences  
57 were observed with respect to the rates of dyspnea, radiographically diagnosed pneumonia and the  
58 presence of at least one comorbidity in patients who were infected with only *M. pneumoniae*, AdV,  
59 HRhV, Flu A/H3N2, Flu A /pH1N1 or Flu B/Yamagata. The differences in the positivity rates of  
60 the above 6 pathogens among the different age groups were nonsignificant.

## 61 **Conclusions**

62 *M. pneumoniae*, AdV and Flu A/H3N2 were the main pathogens detected in hospitalized SARI  
63 patients aged more than 16 years in Jinshan district, Shanghai. Our findings highlight the  
64 importance of sustained multipathogen surveillance among SARI patients in sentinel hospitals,  
65 which can provide useful information on SARI etiologies, epidemiology, and clinical  
66 characteristics.

67 **Key words:** Severe acute respiratory infection, sentinel surveillance, pathogen, epidemiology

## 68 **Background**

69 Severe acute respiratory infection (SARI) has been considered an important contributor to  
70 morbidity and mortality in all age groups, particularly children, elderly individuals and individuals  
71 with compromised immune, cardiac and pulmonary systems, worldwide [1-3]. It is estimated that  
72 SARI causes approximately 4.2 million deaths annually. Of these, up to 90% are believed to occur  
73 in developing countries [4]. Various viral and bacterial pathogens are associated with SARI. Due  
74 to their extremely high potential for human-to-human transmission, these pathogens pose a  
75 substantial risk to human health. While bacterial infection has a substantial influence on the  
76 development of severe pneumonia [5], a significant proportion of SARIs are attributed to viral  
77 pathogens, such as influenza viruses A and B (Flu A/B), parainfluenza viruses (PIV), adenoviruses  
78 (AdVs), respiratory syncytial viruses (RSVs), human coronaviruses (HCoVs) and human  
79 rhinoviruses (HRhVs) [6]. Nevertheless, owing to the lack of gold standard diagnostic methods to  
80 rapidly identify etiological agents, most patients are treated with antibiotics empirically [7]. Rapid  
81 etiologic diagnosis therefore remains a significant public health challenge.

82 Routine pathogen monitoring is critical for preparedness  and response to the SARI epidemic.  
83 Since SARI is the leading cause of hospitalization in children under the age of 5 years and of  
84 febrile episodes in infants younger than 3 months old, most available studies regarding the burden  
85 of SARI focus on viral infections in children [8-11]. A SARI surveillance study in China revealed  
86 that 90% of patients were aged <15 years [12]. In addition, the majority of the data on the  
87 epidemiology of the etiologic agents of SARI was collected in developed regions. The  
88 epidemiological characteristics and distributions of the major viral pathogens in adult SARI

89 patients are still limited in developing regions [13]. *Mycoplasma pneumoniae* (*M. pneumoniae*)  
90 has long been considered an important etiology of respiratory disease and is more frequently  
91 isolated among children and young adults [14, 15]. Research on active surveillance in hospitalized  
92 adult patients suffering from SARI in China is scarce. Accordingly, a pilot study on active  
93 surveillance of SARI was initiated to characterize community-acquired pulmonary infections and  
94 monitor the epidemiologic and etiologic characteristics of SARI caused by various viral pathogens  
95 and *M. pneumoniae* in adult inpatients in Jinshan district, Shanghai, in April 2017. The aim of the  
96 present study was to characterize the demographic and epidemiologic characteristics of SARI,  
97 identify the etiologies and assess the clinical profiles associated with SARIs in hospitalized adult  
98 patients in Jinshan, Shanghai, by performing 12 months of active surveillance.

## 99 **Materials and methods**

### 100 **Study setting**

101 Jinshan district is a suburb located in southwest Shanghai, P.R. China. Active surveillance was  
102 initiated at Jinshan District Central Hospital in April 2017 and was conducted for 12 months. This  
103 hospital was selected because it is one of the largest general hospitals in the district and a national  
104 surveillance sentinel site for influenza virus. It serves most of the population of Jinshan district,  
105 with a total of 636 beds. In 2017, the registered population in Jinshan district was 523,641, of  
106 which 467,320 (89.24%) were adults aged more than 18 years [16].

### 107 **Study subjects**

108 All patients aged over 16 years who were admitted to the intensive care unit, respiratory medicine  
109 department and general wards in the hospital were screened by a trained physician between April  
110 2017 and March 2018. Patients were diagnosed with SARI according to the World Health



111 Organization (WHO) definition, which includes acute respiratory infection with a measured fever  
112 of  $\geq 38^{\circ}\text{C}$ , cough onset within the last 10 days and required hospitalization [1].

### 113 **Data collection**

114 After hospital admission, a standard case report form was completed for each eligible patient. The  
115 form comprised information on demographic characteristics (sex, age, weight, height, residence),  
116 vaccination (received an influenza vaccine 1 year before illness onset, ever received a  
117 pneumococcal conjugate vaccine), admission diagnosis, comorbidities (asthma, chronic bronchitis,  
118 chronic obstructive pulmonary disease (COPD), hypertension, diabetes, cardiovascular disease,  
119 tumor), clinical presentation (fever, cough, difficult breathing, sore throat), antibiotic treatments  
120 prior to hospitalization, exposure history (smoking, visiting a live poultry market, contact with live  
121 poultry, contact with a patient with fever and respiratory symptoms within 2 weeks before illness  
122 onset). At discharge, the form was updated to include information about treatment in the hospital,  
123 chest computed tomographic (CT) findings, complications and prognosis. Data were collected by  
124 the trained physician. To ensure the accuracy of the data, spouses or caregivers who lived with the  
125 patients for more than 2 weeks before illness onset were interviewed, and the medical records of  
126 the patients were reviewed. Two radiologists interpreted chest CT scans independently. In the case  
127 of a disagreement, a third radiologist was consulted to reach a final decision. All the information  
128 that could identify the personality of patients was masked during or after data collection.

### 129 **Specimen collection and laboratory testing**

130 A single flocculated polyester nasopharyngeal swab (Becton Dickinson, USA, MD) sample was  
131 collected from each SARI patient by a nurse within 24 hours of admission following a standard  
132 procedure. The swab was inserted into a cryovial containing 3 ml of viral transport medium

133 (Tiandz, China, Beijing). The specimens were stored at 4°C in the hospital and transferred within  
134 24 hours of collection to the laboratory at Jinshan District Center for Disease Control and  
135 Prevention (CDC), where they were preserved at -70°C until **testing was performed**. Viral RNA  
136 and DNA were extracted from 200-µl samples using the QIAamp Viral RNA/DNA Mini Kit  
137 (Qiagen, Hilden, Germany) following the manufacturer's instructions. To guarantee integrity,  
138 specimens were lysed under denaturing conditions to deactivate RNases [1]. Pure viral RNA and  
139 DNA were eluted in 60 µl of low-salt buffer, and impurities were removed. Viral nucleic acid  
140 extracts were further processed by multiplex real-time reverse transcription polymerase chain  
141 reaction (RT-PCR). The qualitative RespiFinder 2SMART multiplex real-time RT-PCR diagnostic  
142 strategy (Geneodx, Shanghai, China) was adopted to detect 15 respiratory pathogens, including  
143 PIV (types 1, 2, 3 and 4), HCoV (types 229E, OC43, HKU1 and NL63), RSV (types A and B),  
144 HRhV, AdV, human metapneumovirus (HMPV), human bocavirus (HBoV) and *M. pneumoniae*,  
145 using the CFX96™ real-time PCR system (Bio-Rad, Hercules, CA, USA) according to the  
146 manufacturer's protocols. In addition, RNA from each specimen was identified for specific  
147 primers and probes that target Flu A/B using real-time RT-PCR following the US CDC's protocol.  
148 Specimens that were positive for Flu A and Flu B were subsequently subtyped for pandemic  
149 influenza virus A/H1N1 (Flu A/pH1N1) and seasonal influenza virus A/H3N2 (Flu A/H3N2) and  
150 Flu B/Yamagata and Flu B/Victoria, respectively [17]. These tests were performed in the biosafety  
151 level 2 laboratory of the Jinshan CDC.

## 152 **Statistics**

153 The collected data were double-entered into a database constructed in EpiData 3.1. Logic checks  
154 to assess the quality of data entry were conducted. Single infection was defined as infection

155 caused by one pathogen, and multiple infection was defined as infection caused by at least 2  
156 pathogens (virus/virus, virus/*M. pneumoniae*) in a single specimen. Continuous data are reported  
157 as medians and interquartile ranges (IQRs), and the Mann-Whitney U test was used to compare  
158 differences between groups. Categorical data are expressed as frequencies and proportions, and  
159 the chi-squared test or Fisher's exact test, as appropriate, was used to compare patients with and  
160 without confirmed pathogens in terms of demographics, clinical characteristics, epidemiologic  
161 characteristics, treatment and prognosis. Bonferroni's correction was used for pairwise  
162 comparisons. For proportions, the binomial 95% confidence interval is reported. The analysis was  
163 performed using SPSS v. 25.0 (IBM Corporation, Armonk, NY, USA), and all tests were  
164 two-sided with a 5% significance level.

#### 165 **Ethics statement**

166 This study was part of a hospital-based SARI surveillance program in Shanghai and was approved  
167 by the ethical review committee of the Shanghai Municipal Center for Disease Control and  
168 Prevention (Ref #: 2015-14). Written informed consent was obtained from patients or proxies  
169 before enrollment and from parents or guardians of those under 18 years old. This study was  
170 conducted in accordance with the Declaration of Helsinki.

#### 171 **Results**

##### 172 **Demographic characteristics**

173 From April 2017 to March 2018, a total of 397 patients meeting the SARI case definition were  
174 admitted to our hospital. One or more pathogens were detected in 250 patients (63.0%; 95% CI:  
175 58.2-67.7%), and negative results were obtained from the remaining 147 patients. The median age  
176 of the patients was 68 years (IQR: 59-78; range: 16 to 99 years). Among the SARI patients, 194

177 (48.9%) were male, and 203 (51.9%) were female. The majority of patients were elderly patients  
178 aged 60 or more years (295 cases), accounted for 74.3% of the total patients; 58 (14.6%) patients  
179 were 40-59 years of age, and 19 (4.8%) patients were 30-39 years of age. Those less than 30 years  
180 old represented only 6.3% of the total patients (25 cases). The percentages of patients with a body  
181 mass index (BMI) <20, between 20 and 25, and >25 were 29.7%, 52.4% and 17.9%, respectively.  
182 A total of 278 SARI patients (70.0%) had at least one comorbidity, and 119 patients had no  
183 comorbidity (Table 1). There were no significant differences in sex, age, BMI and underlying  
184 chronic medical conditions between SARI patients with confirmed pathogens and those without  
185 confirmed pathogens ( $P>0.05$ ).

#### 186 **Etiologies**

187 Of the 397 SARI patients, 198 (49.9%; 95% CI: 45.0-54.8%) patients had single infection, while  
188 52 (13.1%; 95% CI: 9.8-16.4%) patients had multiple infection. The most prevalent pathogen  
189 identified was *M. pneumoniae* in 95 (23.9% of the total samples) patients, followed by AdV in 46  
190 (11.6%) patients, Flu A/H3N2 in 44 (11.1%) patients, HRhV in 32 (8.1%) patients, Flu  
191 B/Yamagata in 25 (6.3%) patients, and Flu A /pH1N1 in 16 (4.0%) patients. Other viruses,  
192 including PIV type 1, HCoV type NL63, HCoV type 229E, HCoV type HKU1, PIV type 3, HMPV,  
193 PIV type 4, HCoV type OC43, Flu B/Victoria, RSV type B and HBoV, were detected in a 0.3% to  
194 2.0% of samples (Table 2). The most frequently detected pathogens in patients with multiple  
195 infection were *M. pneumoniae* (84.6%, 44/52), AdV (28.8%, 15/52), HRhV (25.0%, 13/52), and  
196 Flu A/H3N2 (17.3%, 9/52).

#### 197 **Clinical and epidemiologic characteristics**

198 Pneumonia (222 cases, 55.9%) was the most common clinical diagnosis made by clinicians on

199 admission, followed by bronchiolitis (68 cases, 17.1%). The most common symptoms on  
200 admission were cough (99.2%) and sputum production (88.4%), followed by thoracalgia (7.1%)  
201 and pharyngalgia (6.8%). Of the 397 SARI patients, a temperature  $\geq 39^{\circ}\text{C}$  was recorded in 189  
202 SARI patients (47.6%) on admission. A total of 382 patients (96.2%) underwent chest CT, of  
203 whom 258 (67.5%) were reported to have radiographic evidence of pneumonia; the remaining 15  
204 patients did not undergo chest CT examination. Thirty-two SARI patients had exposure to a  
205 patient with fever and respiratory symptoms, while 30 SARI patients had contact with live poultry  
206 2 weeks before illness onset. Among the 397 patients, only 5 patients had received a  
207 pneumococcal conjugate vaccine, and 1 patient was vaccinated against influenza (Table 3). No  
208 significant differences in the proportions of clinical and **epidemiologic** characteristics between  
209 SARI patients with confirmed pathogens and those without confirmed pathogens were found,  
210 except for chest radiographic examination findings. As illustrated in Table 4, the differences in the  
211 proportions of dyspnea, radiographic diagnosis of pneumonia and the presence of at least one  
212 comorbidity among patients infected with only one of the 6 main pathogens, including *M.*  
213 *pneumoniae*, AdV, HRhV, Flu A/H3N2, Flu A /pH1N1 and Flu B/Yamagata, were statistically  
214 significant. Notably, the proportion of patients with radiographic evidence of pneumonia was  
215 **highest** in patients infected by *M. pneumoniae* (74.5%), and dyspnea was the most common  
216 presentation in patients with HRhV (21.1%).

### 217 **Seasonal trends**

218 Figure 1 shows monthly variations in the number of SARI patients infected with *M. pneumoniae*,  
219 AdV, Flu A/H3N2, Flu A /pH1N1, HRhV, and Flu B/Yamagata. Over the 12-month period, the  
220 temporal distribution of pathogen-confirmed SARI patients had a bimodal shape, with the first



221 peak in the summer and the second peak in the winter. The duration of the first positive peak was  
222 2 months, from August to September, but the second peak lasted only 1 month. The infection  
223 peaks seemed to be **attributable** to the number of *M. pneumoniae* and AdV cases detected. In  
224 addition, Flu A/H3N2 contributed to the summer peak, whereas Flu B/Yamagata and Flu  
225 A/pH1N1 dominantly contributed to the winter peak. Unlike other pathogens, HRhV was detected  
226 all year along and did not show **apparent seasonality**. The distributions of the seasonal patterns of  
227 the positivity rates of the main 6 pathogens are shown in Figure 2. Flu A/H3N2 prevalence peaked  
228 in summer (Jun-Aug) and autumn (Sep-Nov), with positivity rates of 21.1% (20/95) and 22.3%  
229 (21/94), respectively ( $P>0.05$ ). However, Flu A/pH1N1 and Flu B/Yamagata peaked in winter  
230 (Dec-Feb), with positivity rates of 9.8% (13/132) and 18.9% (25/132), respectively; the  
231 differences were statistically significant ( $P<0.01$ ). It is worth noting that no SARI patients infected  
232 by Flu B/Yamagata were detected in spring (Mar-May), summer or autumn. The positivity rate of  
233 *M. pneumoniae* was significantly higher in autumn (43.6%, 41/94) than **in** other seasons ( $P<0.01$ ).  
234 The positivity rate (18.4%, 14/76) of HRhV was significantly higher in spring than that in the  
235 other seasons ( $P<0.01$ ). The positivity rate of AdV did not demonstrate obvious seasonality  
236 throughout the year ( $P>0.05$ ).

### 237 **Age distribution**

238 The age group distributions of the positivity rates of the main pathogens, *M. pneumoniae*, AdV,  
239 Flu A/H3N2, Flu A/pH1N1, HRhV, and Flu B/Yamagata, are shown in Figure 3. The prevalence  
240 rates of Flu A/pH1N1 (8.0%) and AdV (20.0%) peaked in the group younger than 30 years old,  
241 although the difference was not significant ( $P>0.05$ ). The positivity rates of *M. pneumonia* (36.2%)  
242 and Flu B/Yamagata (6.9%) were the highest in the 40-59-year-old group, without statistical

243 significance ( $P>0.05$ ). Moreover, no significant differences among the different age groups were  
244 observed with regard to the positivity rates of Flu A/H3N2 and HRhV. Interestingly, no patients  
245 infected with Flu A/H3N2 and HRhV were detected in the 30- to 39-year-old group.

#### 246 **Treatment and prognosis**

247 The median duration from illness onset to admission in SARI patients was 3 days (IQR: 2-5.5;  
248 range: 0 to 14 days), and the median duration of hospitalization was 10 days (IQR: 8-13 days).  
249 Complications occurred in 61 SARI patients, with electrolyte metabolism disorder (19 cases),  
250 respiratory failure (14 cases) and cardiac insufficiency (8 cases) being the most common  
251 complications. The remaining 336 patients did not report any complications. No significant  
252 differences between SARI patients with confirmed pathogens and those without confirmed  
253 pathogens were observed with regard to the use of antibiotics (levofloxacin, cephalosporin,  
254 azithromycin), antivirals (oseltamivir), glucocorticoids and oxygen therapy ( $P>0.05$ ). The duration  
255 of antibiotic use during hospitalization was 1-15 days (median: 9 days [IQR 5-11]) in SARI  
256 patients without confirmed pathogens and 1-20 days (median: 9 days [IQR 6-11]) in those with  
257 confirmed pathogens, though the difference was nonsignificant ( $P=0.68$ ). Three SARI patients  
258 died during hospitalization (Table 5).

#### 259 **Discussion**

260 Hospital-based sentinel surveillance of SARI can be used as a strategy to monitor trends in this  
261 relatively severe disease and is critical for establishing a platform to understand the epidemiologic  
262 and etiologic profiles at the local level. A monitoring study involving SARI patients in Georgia  
263 demonstrated that the proportions of patients positive for respiratory pathogens varied widely  
264 between seasons; there was no influenza detected in summer and early autumn (from July to

265 October) but a 30% RSV positivity rate from March 2015–2017[1]. Another surveillance study  
266 involving SARI patients in several countries found that the positivity rates of influenza viruses  
267 varied widely depending on country and season, from 2.1% in Armenia in 2011–2012 to 100% in  
268 Albania in 2009–2010 [18]. A comparative study of viral profiles in hospitalized pediatric SARI  
269 patients in Beijing and Shanghai, China, showed different viral profile patterns in the 2 cities;  
270 RSV (52.9%) and HRhV/enterovirus (34.7%) were the most prevalent etiological agents of SARI  
271 in Beijing, whereas HRhV/enterovirus (33.6%) and HBoV (17.7%) were the main pathogens of  
272 SARI in Shanghai [10]. The early detection of divergent SARI pathogens through sentinel  
273 surveillance can measure the burden of disease on the basis of severity and better prepare a region  
274 for an emergency response. To our knowledge, this pilot study is the first study to continuously  
275 surveil 19 respiratory pathogens in adult SARI patients in Shanghai, eastern China, providing an  
276 improved understanding of the epidemiology, etiologic spectrum and clinical profile of SARI.  
277 During 1 year of active surveillance, 397 patients who met the established case definition of SARI  
278 were eligible for enrollment in this study, and 63.0% of these patients tested positive for at least  
279 one pathogen. Our findings were in accordance with those reported elsewhere, which revealed  
280 etiologies in 50% to 85% of hospitalized SARI cases [7, 19-20].

281 From April 2017 to March 2018 in Jinshan district, the main etiologies of SARI varied  
282 seasonally; *M. pneumoniae*, AdV, Flu A/H3N2, HRhV, Flu B/Yamagata, and Flu A/pH1N1 were  
283 the predominant pathogens depending on the month. Other viruses, such as PIV type 1, HCoV  
284 type NL63, HCoV type 229E, HCoV type HKU1, PIV type 3, HMPV, PIV type 4, HCoV type  
285 OC43, Flu B/Victoria, RSV type B and HBoV, were also present, although the numbers of patients  
286 infected with these viruses were relatively small. Since our surveillance system aimed to detect

287 SARI in adult patients, most of the enrolled patients were elderly individuals aged 60-79 years  
288 (52.1%) 80 years and above (22.2%). Our study demonstrates that individuals **in the** over 60 age  
289 **group** are the most vulnerable to SARI in Jinshan, a subtropical region. In the present study, at  
290 least one chronic medical condition was present in 70% of SARI patients. Our study population  
291 had a high prevalence of comorbidities **compared with that in a study in Hubei Province**, China  
292 [12]. This may be partially explained by the **inconsistency in** socioeconomic development **between**  
293 the 2 regions. Hypertension and cardiovascular disease were observed in 38.3% and 7.6% of our  
294 population, respectively. Patients with confirmed pathogens had a higher prevalence of  
295 cardiovascular disease than those without confirmed pathogens. One study suggested that  
296 diagnosed cardiovascular disease was related to a fatal outcome in influenza-positive SARI  
297 patients [21]. Our study revealed that the proportions of patients who received influenza and  
298 pneumococcal conjugate vaccines were **quite low**, so respiratory disease vaccination programs  
299 targeting individuals with cardiovascular-related diseases should be recommended. In this study,  
300 most patients presented with cough, sputum production and fever. These clinical features bear  
301 some resemblance to those reported in a previous study [1]. It should be noted that empirical  
302 administration of antibiotics during hospitalization occurred in 99% of patients in the present  
303 study due to the unavailability of rapid pathogen identification tests. The current study found that  
304 pneumonia was the main reason for hospital admission of SARI patients (55.9%), followed by  
305 bronchiolitis (17.1%) in Jinshan, a region in eastern China. A similar study in northern China  
306 showed that pneumonia (88.95%) and bronchiolitis (6.37%) were also the top 2 admission  
307 **diagnoses** among SARI patients [22]. HRhV has emerged as an independent causative agent of  
308 lower respiratory tract infection. To date, the majority of investigations on HRhV-associated lower

309 respiratory tract infection in adults have focused on immunocompromised patients [23-25] or  
310 those with hospital-acquired pneumonia [26-27]. We compared the patients with single infection  
311 in terms of signs and symptoms, and the results showed that dyspnea was the most frequent  
312 symptom (21.1%) in community-acquired SARI patients infected by HRhV, which was consistent  
313 with the results of a similar multicenter study (30%) in China [28]. *M. pneumoniae* is an  
314 important cause of community-acquired pneumonia. Depending on the setting, 10%-40% of  
315 community-acquired pneumonia patients are infected with *M. pneumoniae* [20]. Our study also  
316 showed that patients infected by *M. pneumoniae* had the highest rate of radiographic evidence of  
317 pneumonia (74.5%) compared with those infected by other single pathogens, demonstrating that  
318 community-acquired pneumonia is a heterogeneous disease. Among the 382 SARI patients who  
319 underwent chest CT, there was a significant difference in the proportion of patients who accepted  
320 a chest radiographic examination between SARI patients with confirmed pathogens and those  
321 without confirmed pathogens. However, a significant difference in the proportion of patients  
322 presenting a radiographic diagnosis of pneumonia between SARI patients with confirmed  
323 pathogens and those without confirmed pathogens was not observed, suggesting that the etiologies  
324 and disease courses of community-acquired pneumonia were highly variable.

325 *M. pneumoniae* (23.9%) was the most common pathogen in the present study. The positive  
326 detection rate of *M. pneumoniae* was similar to the published rate (19.7%) in northern China [20].  
327 A prospective study in Hong Kong including adults hospitalized with pneumonia from 2004 to  
328 2005 found that *M. pneumoniae* was detected in 78/1,193 patients (6.5%) [29]. *M.*  
329 *pneumoniae* occurs endemically worldwide in many different geographic regions. *M. pneumoniae*  
330 was mostly detected in autumn (43.6%) and spring (27.6%) in our study, but *M. pneumoniae* in

331 Istanbul was more commonly identified in summer (44.9%) and winter (22.4%) [30]. As the  
332 second most common pathogen in this study, the positivity rate of AdV did not significantly differ  
333 seasonally; this trend in seasonality was consistent with previously reported AdV seasonality data  
334 from China [10]. In contrast with the seasonality of viral SARI observed in Georgia in 2015-2017  
335 and in northern China in 2014-2016, where a distinct winter-only influenza peak was observed  
336 [31,32], we found that influenza peaked in both the winter and in summer. Overall, influenza virus  
337 was common in this study, with Flu A/H3N2 dominating in summer and Flu B/Yamagata and Flu  
338 A/pH1N1 dominating in winter. According to our findings, the positivity rate of Flu B/Yamagata  
339 (18.9%) was nearly twice that of Flu A/pH1N1 (9.8%) in winter; this result was different from that  
340 of a study in the USA in which estimated excess hospitalization rates associated with influenza B  
341 were lower than those associated with Flu A/H3N2 [33]. In this study, we also noted that no  
342 significant differences were found in the positivity rates *M. pneumoniae*, AdV, Flu A/H3N2, Flu A  
343 /pH1N1, HRhV, and Flu B/Yamagata among the different age groups. This result was basically the  
344 same as that in a previous study in China [10] and may be **attributable** to susceptibility to these  
345 common viruses in different age groups of adults. As reported elsewhere [34], coinfections were  
346 relatively common in the present study. A total of 13.1% of SARI patients were reported to have  
347 more than one pathogen infection; this percentage was consistent with that in a previous study  
348 (11.7%) [19].

#### 349 **Limitations**

350 Our study was subject to several limitations. First, as a pilot study, this study was conducted at  
351 only 1 hospital. Even though this hospital is the largest hospital in the district, the findings may  
352 have relatively limited generalizability. The prevalence of each pathogen may vary in regions with

353 different climates, demographic patterns and accessibility to healthcare. Second, the result was  
354 based on SARI surveillance over a 12-month period, and the burden due to SARI may not reflect  
355 the actual situation over several years. Third, the case report form in this study was a standard  
356 structured questionnaire, and the results were collected to determine whether the patient had  
357 received a radiographic diagnosis of pneumonia. It was impossible to pinpoint the type of  
358 pneumonia, such as lobar pneumonia or atypical pneumonia. The pathogens detected in this pilot  
359 study covered only common respiratory viruses and *M. pneumoniae* and did not include related  
360 respiratory bacterial pathogens, such as *Pneumococcus* and *Bordetella pertussis*, owing to limited  
361 financial support, so SARI patients without confirmed pathogens may have been positive for other  
362 nontested bacterial pathogens. Indeed, the inclusion of bacterial surveillance is under  
363 consideration for integration into our program.

## 364 **Conclusions**

365 In conclusion, the current study was the first to monitor hospitalized adult SARI patients for  
366 most respiratory viruses and *M. pneumoniae* in Shanghai and confirmed that multiple respiratory  
367 pathogens may circulate among the SARI population and vary with climatic and demographic  
368 characteristics. This finding highlights the importance of sustained sentinel surveillance of SARIs  
369 at the local and national levels, which can guide accurate evaluations of the prevalence of  
370 etiological agents of SARI and the burden of disease and, most importantly, shape public policies  
371 on SARI prevention and responses to SARI activity.

## 372 **Supporting information**

373 S1 File. Minimal data set.

374 S2 File. Sequences of primers targeting Flu A/B used in real-time RT-PCR.

375 **Acknowledgments**

376 We would like to express our gratitude to the physicians and nurses from Jinshan District Central  
377 Hospital for their significant contribution to the data collection and specimen collection.

378 **Funding**

379 This work was supported by the Research Project of Shanghai Municipal Health Commission  
380 (201940428) and the Infectious Disease and Epidemiology Project of the 6<sup>th</sup> Jinshan District  
381 Medical Key Specialty Construction (JSZK2019B05). The funder had no role in the study design,  
382 data collection and analysis, decision to publish or preparation of the manuscript.

383 **Availability of data and materials**

384 All relevant data are contained within the manuscript and its Supporting Information files.

385 **Author Contributions**

386 **Conceptualization:** Jian Li, Jian-Min Zhu

387 **Data curation:** Can-Lei Song, Tang Wang, Shu-Hua Li

388 **Formal analysis:** Jian Li, Can-Lei Song, Tang Wang

389 **Funding acquisition:** Can-Lei Song, Shu-Hua Li

390 **Investigation:** Can-Lei Song, Tang Wang, Shu-Hua Li

391 **Methodology:** Jian Li, Can-Lei Song, Yu-Long Ye, Jian-Ru Du

392 **Project administration:** Jian-Min Zhu

393 **Supervision:** Can-Lei Song, Tang Wang, Jian-Min Zhu

394 **Validation:** Jian Li, Can-Lei Song, Tang Wang, Yu-Long Ye, Jian-Ru Du, Shu-Hua Li, Jian-Min  
395 Zhu

396 **Writing-original draft:** Jian Li, Can-Lei Song, Tang Wang



397 **Writing-review & editing:** Jian Li, Can-Lei Song, Tang Wang, Yu-Long Ye, Jian-Ru Du,  
398 Shu-Hua Li, Jian-Min Zhu

399 **Competing interests**

400 The authors declare that they have no competing interests.

401 **References**

- 402 1. Chakhunashvili G, Wagner AL, Power LE, Janusz CB, Machablashvili A, Karseladze I, et al.  
403 Severe Acute Respiratory Infection (SARI) sentinel surveillance in the country of Georgia,  
404 2015-2017. PLoS One.2018;13(7):e0201497. <https://doi.org/10.1371/journal.pone.0201497>  
405 PMID:30059540. PubMed Central PMCID: PMC6066249.
- 406 2. Elhakim MM, Kandil SK, Abd Elaziz KM, Anwar WA. Epidemiology of Severe Acute  
407 Respiratory Infection (SARI) cases at a sentinel site in Egypt, 2013-15. J Public Health (Oxf).  
408 2020;42(3):525-33.[https:// doi.org/ 10.1093/pubmed/fdz053](https://doi.org/10.1093/pubmed/fdz053) PMID: 31090911. PubMed Central  
409 PMCID: PMC7107553.
- 410 3. Williams B, Gouws E, Boschi-Pinto C, Bryce J, Dye C. Estimates of world-wide distribution of  
411 child deaths from acute respiratory infections. Lancet Infect Dis. 2002;2(1):25–32. [https://](https://doi.org/10.1016/s1473-3099(01)00170-0)  
412 [doi.org/10.1016/s1473-3099\(01\)00170-0](https://doi.org/10.1016/s1473-3099(01)00170-0) PMID: 11892493.
- 413 4. WHO. The global burden of disease: 2004 update. May 21th, 2020. Available from:  
414 [http://www.who.int/healthinfo/global\\_burden\\_disease/GBD\\_report\\_2004update\\_full.pdf](http://www.who.int/healthinfo/global_burden_disease/GBD_report_2004update_full.pdf).
- 415 5. Watt JP, Wolfson LJ, O'Brien KL, Henkle E, Deloria-Knoll M, McCall N, et al. Burden of  
416 disease caused by Haemophilus influenzae type b in children younger than 5 years: global  
417 estimates. Lancet. 2009;374(9693): 903–11. [https:// doi.org/10.1016/S0140-6736\(09\)61203-4](https://doi.org/10.1016/S0140-6736(09)61203-4)  
418 PMID: 19748399.

- 419 6. Subramoney K, Hellferscee O, Pretorius M, Tempia S, McMorrow M, von Gottberg A, et al.  
420 Human bocavirus, coronavirus, and polyomavirus detected among patients hospitalised with sev  
421 ere acute respiratory illness in South Africa, 2012 to 2013. *Health Sci Rep.* 2018;1(8):e59.  
422 [https:// doi.org/10.1002/hsr2.59](https://doi.org/10.1002/hsr2.59) PMID: 30623094. PubMed Central PMCID: PMC6266378.
- 423 7. Razanajatovo NH, Guillebaud J, Harimanana A, Rajatonirina S, Ratsima EH, Andrianirina ZZ,  
424 et al. Epidemiology of severe acute respiratory infections from hospital-based surveillance in  
425 Madagascar, November 2010 to July 2013. *PLoS One.* 2018;13(11):e0205124. [https://](https://doi.org/10.1371/journal.pone.0205124)  
426 [doi.org/10.1371/journal.pone.0205124](https://doi.org/10.1371/journal.pone.0205124) PMID: 30462659. PubMed Central  
427 PMCID: PMC6248916.
- 428 8. WHO. WHO global technical consultation: global standards and tools for influenza surveillance.  
429 May 21th, 2020. Available from:  
430 [https://extranet.who.int/iris/restricted/bitstream/handle/10665/70724/WHO\\_HSE\\_GIP\\_2011.1\\_](https://extranet.who.int/iris/restricted/bitstream/handle/10665/70724/WHO_HSE_GIP_2011.1_eng.pdf;jsessionid=53A32B0F697E2FEDAA77BF5F971ED037?sequence=1)  
431 [eng.pdf;jsessionid=53A32B0F697E2FEDAA77BF5F971ED037?sequence=1](https://extranet.who.int/iris/restricted/bitstream/handle/10665/70724/WHO_HSE_GIP_2011.1_eng.pdf;jsessionid=53A32B0F697E2FEDAA77BF5F971ED037?sequence=1).
- 432 9. Byington CL, Enriquez FR, Hoff C, Tuohy R, Taggart EW, Hillyard DR, et al. Serious bacterial  
433 infections in febrile infants 1 to 90 days old with and without viral infections. *Pediatrics.*  
434 2004;113(6):1662–6. [https:// doi.org/10.1542/peds.113.6.1662](https://doi.org/10.1542/peds.113.6.1662) PMID: 15173488.
- 435 10. Zhao Y, Lu R, Shen J, Xie Z, Liu G, Tan W. Comparison of viral and epidemiological profiles  
436 of hospitalized children with severe acute respiratory infection in Beijing and Shanghai, China.  
437 *BMC Infect Dis.* 2019;19(1):729. [https:// doi.org/10.1186/s12879-019-4385-5](https://doi.org/10.1186/s12879-019-4385-5) PMID: 31429710.  
438 PubMed Central PMCID: PMC6701130.
- 439 11. Nguenha N, Tivane A, Pale M, Machalele L, Nacoto A, pPires G, et al. Clinical and  
440 epidemiological characterization of influenza virus infections in children with severe acute

441 respiratory infection in Maputo, Mozambique: Results from the implementation of sentinel  
442 surveillance,2014-2016. PLoS One.2018;13(3):e0194138. [https://](https://doi.org/10.1371/journal.pone.0194138)  
443 [doi.org/10.1371/journal.pone.0194138](https://doi.org/10.1371/journal.pone.0194138) PMID: 29590162. PubMed Central  
444 PMID: PMC5874022.

445 12. Yu H, Huang J, Huai Y, Guan X, Klena J, Liu S, et al. The substantial  
446 hospitalization burden of influenza in central China: surveillance for severe, acute respiratory  
447 infection, and influenza viruses, 2010-2012. *Influenza Other Respir Viruses.* 2014; 8(1):53-65.  
448 [https:// doi.org/10.1111/irv.12205](https://doi.org/10.1111/irv.12205) PMID: 24209711. PubMed Central PMID: PMC4177798.

449 13. Fica A, Sotomayor V, Fasce R, Dabanch J, Soto A, Charpentier P, et al. Severe acute  
450 respiratory infections (SARI) from influenza in adult patients in Chile: the experience of a  
451 sentinel hospital. *Rev Panam Salud Publica.* 2019;43:e1. <https://doi.org/10.26633/RPSP.2019.1>  
452 PMID:31093225. PubMed Central PMID: PMC6393720.

453 14. Foy HM, Cooney MK, McMahan R, et al. Viral and mycoplasmal pneumonia in a prepaid  
454 medical care group during an eight-year period. *Am J Epidemiol.* 1973; 97: 93-102.  
455 <https://doi.org/10.1093/oxfordjournals.aje.a121493> PMID: 4347511.

456 15. Waites KB, Xiao L, Liu Y, Balish MF, Atkinson TP. *Mycoplasma pneumoniae* from the  
457 respiratory tract and beyond. *Clin Microbiol Rev.*2017; 30: 747-809.  
458 <https://doi.org/10.1128/CMR.00114-16> PMID: 28539503. PubMed Central  
459 PMID: PMC5475226.

460 16. Bureau of statistics of Jinshan district. Jinshan statistical yearbook 2018. May 20th, 2020.  
461 Available from: <http://www.jinshan.gov.cn/Attach/Attaches/201911/201911140517237545.pdf>.

462 17. WHO. Manual for the laboratory diagnosis and virological surveillance of influenza. May 21th,

463 2020. Available from:[http://whqlibdoc.who.int/publications/2011/9789241548090\\_eng.pdf](http://whqlibdoc.who.int/publications/2011/9789241548090_eng.pdf).

464 18. Meerhoff TJ, Simaku A, Ulqinaku D, Torosyan L, Gribkova N, Shimanovich V, et al.  
465 Surveillance for severe acute respiratory infections (SARI) in hospitals in the WHO European  
466 region—an exploratory analysis of risk factors for a severe outcome in influenza-positive SARI  
467 cases. *BMC Infect Dis.* 2015; 15: 1.<https://doi.org/10.1186/s12879-014-0722-x>  
468 PMID: 25567701. PubMed Central PMCID: PMC4314771.

469 19. Huo X, Qin Y, Qi X, Zu R, Tang F, Li L, et al. Surveillance of 16 respiratory viruses in patients  
470 with influenza-like illness in Nanjing, China. *J Med Virol.* 2012;  
471 84(12):1980-4. <https://doi.org/10.1002/jmv.23401> PMID: 23080506. PubMed Central  
472 PMCID: PMC7166984.

473 20. Breiman RF, Cosmas L, Njenga M, Williamson J, Mott JA, Katz MA, et al. Severe acute  
474 respiratory infection in children in a densely populated urban slum in Kenya, 2007–2011. *BMC*  
475 *Infect Dis.* 2015; 15: 95.<https://doi.org/10.1186/s12879-015-0827-x> PMID: 25879805. PubMed  
476 Central PMCID: PMC4351931.

477 21. Butsashvili M, Kandelaki G, Zakhshvili K, Machablishvili A, Avaliani N.  
478 Influenza-associated mortality in georgia (2009-2011). *Influenza Res Treat.* 2012;2012:480763.  
479 <https://doi.org/10.1155/2012/480763> PMID: 23074667. PubMed Central  
480 PMCID: PMC3447290.

481 22. Xu W, Guo L, Dong X, Li X, Zhou P, Ni Q, et al. Detection of viruses and mycoplasma  
482 pneumonia in hospitalized patients with severe acute respiratory infection in northern China,  
483 2015-2016. *Jpn J Infec Dis.* 2018; 71(2):134-139. <https://doi.org/10.7883/yoken.JJID.2017.412>  
484 PMID: 29491245.

- 485 23. Costa C, Bergallo M, Astegiano S, Sidoti F, Terlizzi ME, Gambarino S, et al. Detection of  
486 human rhinoviruses in the lower respiratory tract of lung transplant recipients. *Arch Virol*  
487 2011;156(8):1439-43. <https://doi.org/10.1007/s00705-011-0986-z> PMID: 21461933. PubMed  
488 Central PMCID: PMC7087099.
- 489 24. Hicks LA, Shepard CW, Britz PH, Erdman DD, Fischer M, Flannery BL, et al. Two outbreaks  
490 of severe respiratory disease in nursing homes associated with rhinovirus. *J Am Geriatr Soc*  
491 2006; 54(2):284-9. <https://doi.org/10.1111/j.1532-5415.2005.00529.x> PMID: 16460380.
- 492 25. Mikulska M, Del Bono V, Gandolfo N, Dini S, Dominietto A, Di Grazia C, et al.  
493 Epidemiology of viral respiratory tract infections in an outpatient haematology facility. *Ann*  
494 *Hematol* 2014;93(4):669-76. <https://doi.org/10.1007/s00277-013-1912-0> PMID: 24097084.  
495 PubMed Central PMCID: PMC7079995.
- 496 26. Louie JK, Yagi S, Nelson FA, Kiang D, Glaser CA, Rosenberg J, et al. Rhinovirus outbreak in  
497 a long term care facility for elderly persons associated with unusually high mortality. *Clin Infect*  
498 *Dis* 2005;41(2):262-5. <https://doi.org/10.1086/430915> PMID: 15983926. PubMed Central  
499 PMCID: PMC7107978.
- 500 27. Wald TG, Shult P, Krause P, Miller BA, Drinka P, Gravenstein S. A rhinovirus outbreak among  
501 residents of a long-term care facility. *Ann Intern Med* 1995;123(8):588-93.  
502 <https://doi.org/10.7326/0003-4819-123-8-199510150-00004> PMID: 7677299.
- 503 28. Wang KQ, Xi W, Yang DH, Zheng YL, Zhang YQ, Chen YS, et al. Rhinovirus is associated  
504 with severe adult community-acquired pneumonia in China. *J Thorac Dis*;  
505 2017;9(11):4502-4511. <https://doi.org/10.21037/jtd.2017.10.107> PMID: 29268520. PubMed  
506 Central PMCID: PMC5721016.

- 507 29. Lui G, Ip M, Lee N, Rainer TH, Man SY, Cockram CS, et al. Role of ‘atypical pathogens’  
508 among adult hospitalized patients with community-acquired  
509 pneumonia. *Respirology*.2009; 14(8):1098–1105. <https://doi.org/10.1111/j.1440-1843.2009.016>  
510 37.x PMID: 19818051.
- 511 30. Goktas S, Sirin MC. Prevalence and seasonal distribution of respiratory viruses during the  
512 2014 – 2015 season in Istanbul. *Jundishapur J Microbiol*. 2016; 9(9): e39132.  
513 <https://doi.org/10.5812/jjm.39132> PMID: 27800148. PubMed Central PMCID: PMC5086027.
- 514 31. Azziz Baumgartner E, Dao CN, Nasreen S, Bhuiyan MU, Mah-E-Muneer S, Ai Mamun A. et  
515 al. Seasonality, timing, and climate drivers of influenza activity worldwide. *J Infect Dis*. 2012;  
516 206(6):838-46. <https://doi.org/10.1093/infdis/jis467> PMID: 22829641.
- 517 32. Zhang Y, Muscatello DJ, Wang Q, Yang P, Pan Y, Huo D, et al. Hospitalizations for  
518 influenza-associated severe acute respiratory infection, Beijing, China, 2014-2016. *Emerg*  
519 *Infect Dis*. 2018;24(11):2098-2102.<https://doi.org/10.3201/eid2411.171410> PMID: 30334719.  
520 PubMed Central PMCID: PMC6199980.
- 521 33. Thompson WW, Shay DK, Weintraub E, Brammer L, Bridges CB, Cox NJ, et al.  
522 Influenza-associated hospitalizations in the United States. *JAMA*. 2004; 292(11):1333–1340.  
523 <https://doi.org/10.1001/jama.292.11.1333> PMID: 15367555.
- 524 34. Hasman H, Pachucki CT, Unal A, Nguyen D, Devlin T, Peeples ME, et al. Aetiology of  
525 influenza-like illness in adults includes parainfluenzavirus type 4. *J Med Microbiol*. 2009;58  
526 (Pt4):408–413. <https://doi.org/10.1099/jmm.0.006098-0> PMID: 19273634. PubMed Central  
527 PMCID: PMC2778239.
- 528

529

530

531 **Table 1.** Demographic characteristics of adult SARI patients in a surveillance hospital in Jinshan,

532 Shanghai, April 2017 to March 2018

| Characteristics            | SARI patients      |                                         |                                            | P value* |
|----------------------------|--------------------|-----------------------------------------|--------------------------------------------|----------|
|                            | All<br>(%) [n=397] | With confirmed pathogens<br>(%) [n=250] | Without confirmed<br>pathogens (%) [n=147] |          |
| Sex                        |                    |                                         |                                            | 0.315    |
| Male                       | 194(48.9)          | 127(50.8)                               | 67(45.6)                                   |          |
| Female                     | 203(51.1)          | 123(49.2)                               | 80(54.4)                                   |          |
| Age group (median, years)  | 68.0               | 67.0                                    | 69.0                                       | 0.357    |
| <30                        | 25(6.3)            | 17(6.8)                                 | 8(5.4)                                     | 0.786    |
| 30-39                      | 19(4.8)            | 10(4.0)                                 | 9(6.1)                                     |          |
| 40-59                      | 58(14.6)           | 39(15.6)                                | 19(12.9)                                   |          |
| 60-79                      | 207(52.1)          | 128(51.2)                               | 79(53.7)                                   |          |
| ≥80                        | 88(22.2)           | 56(22.4)                                | 32(21.9)                                   |          |
| BMI                        |                    |                                         |                                            | 0.657    |
| <20                        | 118(29.7)          | 73(29.2)                                | 45(30.6)                                   |          |
| 20-25                      | 208(52.4)          | 135(54.0)                               | 73(49.7)                                   |          |
| >25                        | 71(17.9)           | 42(16.8)                                | 29(19.7)                                   |          |
| Chronic medical conditions |                    |                                         |                                            |          |
| At least one               | 278(70.0)          | 178(71.2)                               | 100(68.0)                                  | 0.505    |
| Asthma                     | 12(3.0)            | 6(2.4)                                  | 6(4.1)                                     | 0.345    |
| Chronic bronchitis         | 49(12.3)           | 30(12.0)                                | 19(12.9)                                   | 0.787    |
| COPD                       | 28(7.1)            | 13(5.2)                                 | 15(10.2)                                   | 0.060    |
| Hypertension               | 152(38.3)          | 95(38.0)                                | 57(38.8)                                   | 0.878    |
| Cardiovascular disease     | 30(7.6)            | 22(8.8)                                 | 8(5.4)                                     | 0.222    |
| Diabetes                   | 61(15.4)           | 38(15.2)                                | 23(15.6)                                   | 0.905    |
| Cerebrovascular disorder   | 20(5.0)            | 14(5.6)                                 | 6(4.1)                                     | 0.504    |

|       |         |         |        |       |
|-------|---------|---------|--------|-------|
| Tumor | 19(4.8) | 14(5.6) | 5(3.4) | 0.322 |
|-------|---------|---------|--------|-------|

533 \**P* values denote comparisons between SARI patients with confirmed pathogens and SARI  
534 patients without confirmed pathogens.

535

536

537 **Table 2.** Etiological agent distributions among adult SARI patients in a surveillance hospital in  
538 Jinshan, Shanghai, April 2017 to March 2018

| Etiological agent           | Frequency <sup>#</sup> (n) | Percent of samples* (%) |
|-----------------------------|----------------------------|-------------------------|
| Influenza virus A           |                            |                         |
| pH1N1                       | 16                         | 4.0                     |
| H3N2                        | 44                         | 11.1                    |
| Influenza virus B           |                            |                         |
| Yamagata                    | 25                         | 6.3                     |
| Victoria                    | 2                          | 0.5                     |
| Parainfluenza virus         |                            |                         |
| Type 1                      | 8                          | 2.0                     |
| Type 2                      | 0                          | 0                       |
| Type 3                      | 6                          | 1.5                     |
| Type 4                      | 5                          | 1.3                     |
| Human coronavirus           |                            |                         |
| Type 229E                   | 6                          | 1.5                     |
| Type OC43                   | 4                          | 1.0                     |
| Type HKU1                   | 6                          | 1.5                     |
| Type NL63                   | 8                          | 2.0                     |
| Respiratory syncytial virus |                            |                         |
| Type A                      | 0                          | 0                       |
| Type B                      | 2                          | 0.5                     |
| Human rhinovirus            | 32                         | 8.1                     |
| Adenovirus                  | 46                         | 11.6                    |



|                              |     |      |
|------------------------------|-----|------|
| Human metapneumovirus        | 6   | 1.5  |
| Human bocavirus              | 1   | 0.3  |
| <i>Mycoplasma pneumoniae</i> | 95  | 23.9 |
| Single infection             | 198 | 49.9 |
| Multiple infection           |     |      |
| 2 pathogens                  | 43  | 10.8 |
| 3 pathogens                  | 8   | 2.0  |
| 4 pathogens                  | 1   | 0.3  |

539 #The frequency of each pathogen may include both the samples with single infection and those  
540 with multiple infection, and their total number is larger than the sum of samples with single  
541 infection and multiple infection. \*Percent of samples is the frequency of samples with a positive  
542 etiology divided by the total enrolled samples (397 cases).

543

544

545

546

547

548

549

550

551

552

553

554 **Table 3.** Clinical and epidemic characteristics of adult SARI patients in a surveillance  
555 hospital in Jinshan, Shanghai, April 2017 to March 2018

| Characteristics                       | SARI patients      |                                         |                                            | P value* |
|---------------------------------------|--------------------|-----------------------------------------|--------------------------------------------|----------|
|                                       | All<br>(%) [n=397] | With confirmed pathogens<br>(%) [n=250] | Without confirmed<br>pathogens (%) [n=147] |          |
| Temperature $\geq 39^{\circ}\text{C}$ | 189(47.6)          | 126(50.4)                               | 63(42.9)                                   | 0.176    |

|                                                 |               |               |               |              |
|-------------------------------------------------|---------------|---------------|---------------|--------------|
| Cough                                           | 394(99.2)     | 249(99.6)     | 145(98.6)     | 0.558        |
| Sputum production                               | 351(88.4)     | 219(87.6)     | 132(89.8)     | 0.509        |
| Pharyngalgia                                    | 27(6.8)       | 18(7.2)       | 9(6.1)        | 0.680        |
| Thoracalgia                                     | 28(7.1)       | 19(7.6)       | 9(6.1)        | 0.687        |
| Dyspnea                                         | 19(4.8)       | 11(4.4)       | 8(5.4)        | 0.808        |
| Runny nose                                      | 11(2.8)       | 7(2.8)        | 4(2.7)        | 1.000        |
| Vomiting                                        | 15(3.8)       | 10(4.0)       | 5(3.4)        | 0.795        |
| Acceptance of chest radiographic exam           | 382(96.2)     | 236(94.4)     | 146(99.3)     | <b>0.013</b> |
| Presence of radiographic diagnosis of pneumonia | 258/382(67.5) | 153/236(64.8) | 105/146(71.9) | 0.349        |
| Visited a live poultry market                   | 3(0.8)        | 3(1.2)        | 0(0)          | 0.299        |
| Contact with live poultry                       | 30(7.6)       | 19(7.6)       | 11(7.5)       | 1.000        |
| Contact with patient with fever                 | 32(8.1)       | 24(9.6)       | 8(5.4)        | 0.182        |
| Smoking                                         |               |               |               | 0.860        |
| Current                                         | 43(10.8)      | 28(11.2)      | 15(10.2)      |              |
| Former                                          | 66(16.6)      | 43(17.2)      | 23(15.6)      |              |
| Never                                           | 288(72.6)     | 179(71.6)     | 109(74.2)     |              |
| Vaccinated with pneumococcal conjugate vaccine  | 5(1.3)        | 3(1.2)        | 2(1.4)        | 1.000        |
| Vaccinated with influenza vaccine               | 1(0.3)        | 1(0.4)        | 0(0)          | 1.000        |

556 \**P* values denote comparisons between SARI patients with confirmed pathogens and SARI  
557 patients without confirmed pathogens.

558

559

560 **Table 4.** Comparison of characteristics of SARI patients infected with only one of the 6 main  
561 pathogens in a surveillance hospital in Jinshan, Shanghai, April 2017 to March 2018

| Characteristics                                 | <i>M. pneumoniae</i> (%)<br>[n=51] | AdV (%)<br>[n=31] | HRhV (%)<br>[n=19] | Flu A/H3N2 (%)<br>[n=35] | Flu B/Yamagata (%)<br>[n=21] | Flu A/pH1N1 (%)<br>[n=16] | P value*     |
|-------------------------------------------------|------------------------------------|-------------------|--------------------|--------------------------|------------------------------|---------------------------|--------------|
| Sex                                             |                                    |                   |                    |                          |                              |                           | 0.750        |
| Male                                            | 28(54.9)                           | 19(61.3)          | 8(42.1)            | 18(51.4)                 | 9(42.9)                      | 8(50.0)                   |              |
| Female                                          | 23(45.1)                           | 12(38.7)          | 11(57.9)           | 17(48.6)                 | 12(57.1)                     | 8(50.0)                   |              |
| Age group(years)                                |                                    |                   |                    |                          |                              |                           | 0.247        |
| <30                                             | 5(9.8)                             | 3(9.7)            | 1(5.3)             | 1(2.9)                   | 0(0)                         | 2(12.5)                   |              |
| 30-39                                           | 3(5.9)                             | 3(9.7)            | 0(0)               | 0(0)                     | 1(4.8)                       | 1(6.3)                    |              |
| 40-59                                           | 12(23.5)                           | 1(3.2)            | 2(10.5)            | 5(14.3)                  | 3(14.3)                      | 2(12.5)                   |              |
| 60-79                                           | 20(39.2)                           | 15(48.4)          | 8(42.1)            | 24(68.6)                 | 12(57.1)                     | 9(56.3)                   |              |
| ≥80                                             | 11(21.6)                           | 9(29.0)           | 8(42.1)            | 5(14.3)                  | 5(23.8)                      | 2(12.5)                   |              |
| At least one comorbidity                        | 25(49.0)                           | 23(74.2)          | 13(68.4)           | 26(74.3)                 | 18(85.7)                     | 11(68.8)                  | <b>0.034</b> |
| Temperature ≥39°C                               | 30(58.8)                           | 16(51.6)          | 6(31.6)            | 16(45.7)                 | 9(42.9)                      | 8(50.0)                   | 0.444        |
| Cough                                           | 51(100)                            | 31(100)           | 19(100)            | 34(97.1)                 | 21(100)                      | 16(100)                   | 0.705        |
| Sputum production                               | 39(76.5)                           | 29(93.5)          | 15(78.9)           | 30(85.7)                 | 19(90.5)                     | 16(100)                   | 0.120        |
| Pharyngalgia                                    | 3(5.9)                             | 3(9.7)            | 2(10.5)            | 2(5.7)                   | 2(9.5)                       | 2(12.5)                   | 0.876        |
| Thoracalgia                                     | 4(7.8)                             | 2(6.5)            | 1(5.3)             | 0(0)                     | 2(9.5)                       | 1(6.3)                    | 0.523        |
| Dyspnea                                         | 0(0) †                             | 1(3.2)            | 4(21.1) †          | 1(2.9)                   | 1(4.8)                       | 0(0)                      | <b>0.007</b> |
| Runny nose                                      | 1(2.0)                             | 1(3.2)            | 1(5.3)             | 1(2.9)                   | 0(0)                         | 2(12.5)                   | 0.360        |
| Vomiting                                        | 0(0)                               | 3(9.7)            | 0(0)               | 3(8.6)                   | 1(4.8)                       | 1(6.3)                    | 0.123        |
| Presence of radiographic diagnosis of pneumonia | 38(74.5) <sup>#</sup>              | 17(54.8)          | 13(68.4)           | 15(42.9) <sup>#</sup>    | 13(61.9)                     | 7(43.8)                   | <b>0.042</b> |
| Visited a live poultry market                   | 1(2.0)                             | 1(3.2)            | 0(0)               | 0(0)                     | 0(0)                         | 0(0)                      | 0.880        |
| Contact with live poultry                       | 6(11.8)                            | 3(9.7)            | 2(10.5)            | 1(2.9)                   | 1(4.8)                       | 1(6.3)                    | 0.753        |
| Contact with a patient with fever               | 3(5.9)                             | 4(12.9)           | 2(10.5)            | 1(2.9)                   | 3(14.3)                      | 2(12.5)                   | 0.442        |
| Current Smoker                                  | 2(3.9)                             | 4(12.9)           | 2(10.5)            | 6(17.1)                  | 3(14.3)                      | 3(18.8)                   | 0.333        |
| Former Smoker                                   | 10(19.6)                           | 7(22.6)           | 2(10.5)            | 7(20.0)                  | 3(14.3)                      | 0(0)                      |              |

|              |          |          |          |          |          |          |
|--------------|----------|----------|----------|----------|----------|----------|
| Never Smoked | 39(76.5) | 20(64.5) | 15(78.9) | 22(62.9) | 15(71.4) | 13(81.3) |
|--------------|----------|----------|----------|----------|----------|----------|

562 \*P values denote comparisons among the six main pathogens. † and # signify P<0.05 for pairwise  
563 comparisons. † refers to comparisons between the single-infected SARI patients with *M.*  
564 *pneumoniae* and those with HRhV. # refers to comparisons between SARI patients infected with  
565 *M. pneumoniae* and those infected with Flu A/H3N2.

566

567

568 **Table 5.** Treatments and prognoses in adult SARI patients in a surveillance hospital in Jinshan,

569 Shanghai, April 2017 to March 2018

| Characteristics                      | SARI patients      |                                         |                                            | P value* |
|--------------------------------------|--------------------|-----------------------------------------|--------------------------------------------|----------|
|                                      | All<br>(%) [n=397] | With confirmed pathogens<br>(%) [n=250] | Without confirmed<br>pathogens (%) [n=147] |          |
| Clinical course (median, days)       |                    |                                         |                                            |          |
| From illness onset to admission      | 3                  | 3                                       | 3                                          | 0.567    |
| Length of hospitalization            | 10                 | 10                                      | 10                                         | 0.545    |
| Antibiotics prior to hospitalization | 241 (61.0)         | 151 (60.9)                              | 90 (61.2)                                  | 0.723    |
| Antibiotics during hospitalization   | 393(99.0)          | 246(98.4)                               | 147(100)                                   | 0.301    |
| Antivirals                           | 11(2.8)            | 7(2.8)                                  | 4(2.7)                                     | 1.000    |
| Glucocorticoids                      | 112(28.2)          | 72(27.2)                                | 40(28.8)                                   | 0.734    |
| Oxygen therapy                       | 196(49.4)          | 124(49.6)                               | 72(49.0)                                   | 0.918    |
| Complications                        | 61(15.4)           | 37(14.8)                                | 24(16.3)                                   | 0.684    |
| Death                                | 3(0.8)             | 2(0.8)                                  | 1(0.7)                                     | 1.000    |

570 \*P values denote comparisons between SARI patients with confirmed pathogens and SARI

571 patients without confirmed pathogens.

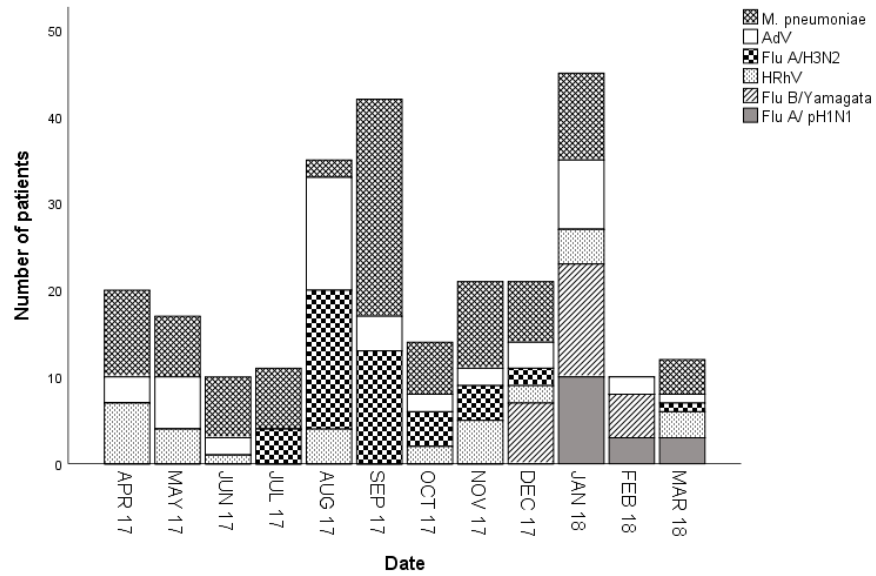

**Fig. 1** Monthly variations in the six main pathogens detected in adult SARI patients in a surveillance hospital in Jinshan, Shanghai, April 2017 to March 2018

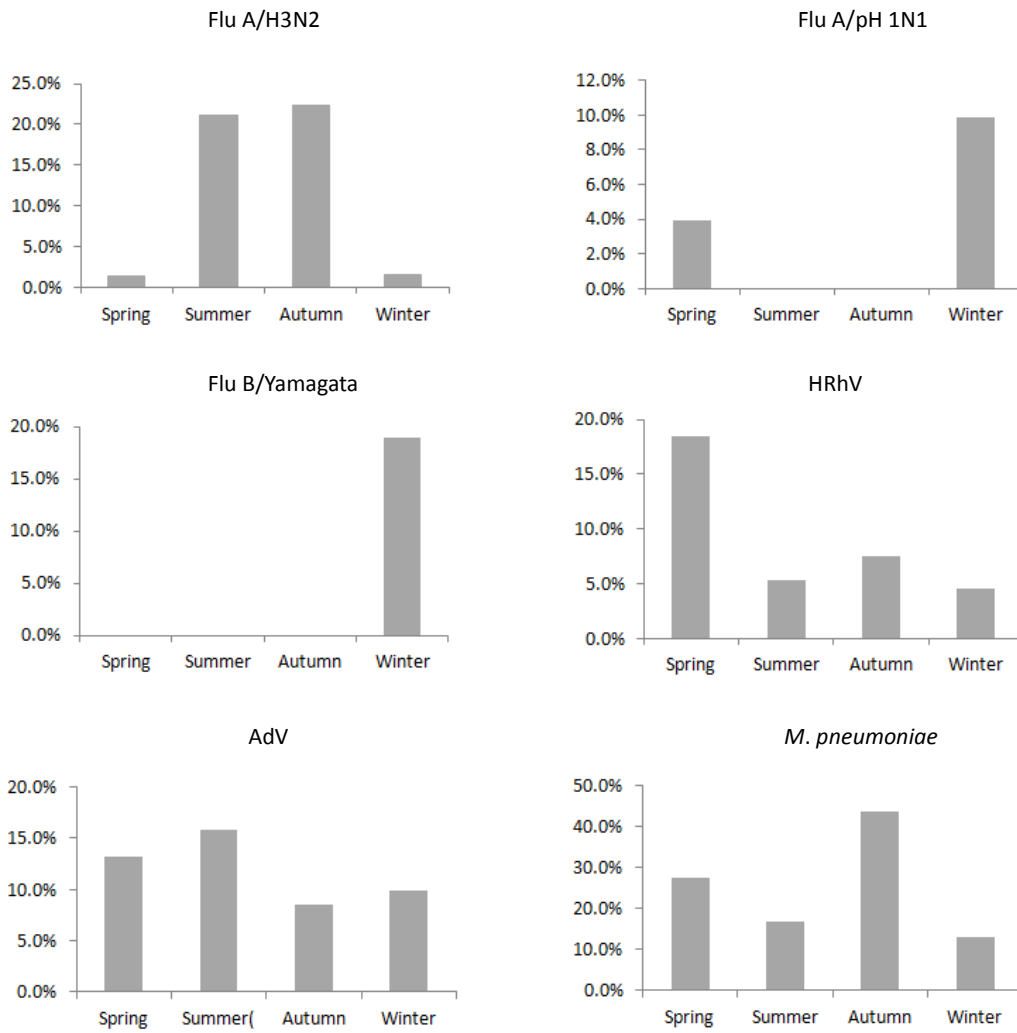

**Fig. 2** Detection rates of the six main pathogens in adult SARI patients in different seasons in a surveillance hospital in Jinshan, Shanghai. Each panel shows the seasonal distribution of a pathogen in SARI patients. For each pathogen, the detection rate on the y-axis refers to the number of positive patients divided by the total number of patients tested in a season.

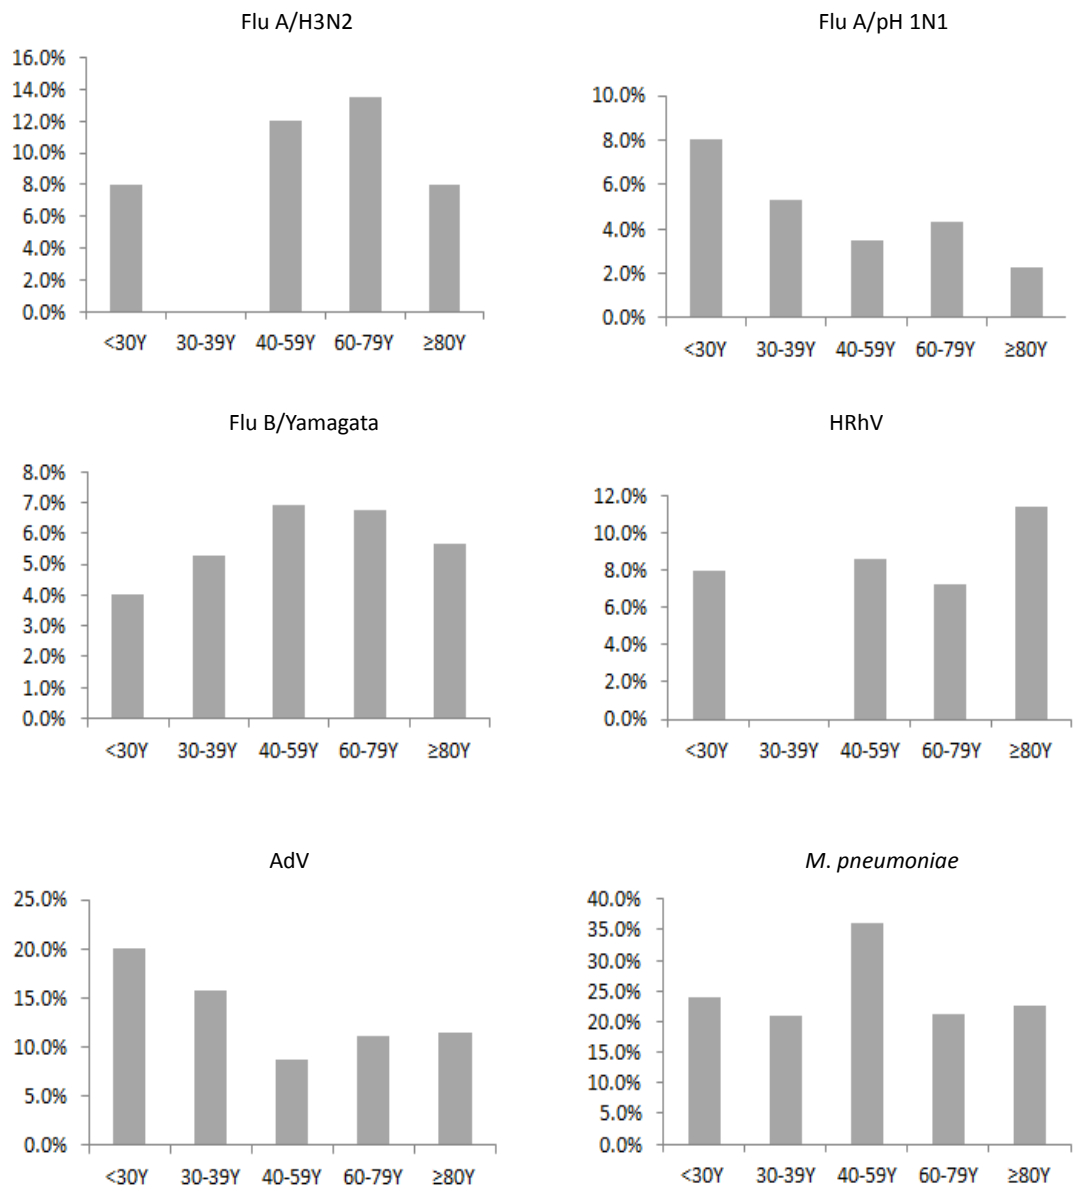

**Fig. 3** Detection rates of the six main pathogens in SARI patients according to age group in a surveillance hospital in Jinshan, Shanghai, April 2017 to March 2018. Each panel shows the age group-specific detection rate of one pathogen in SARI patients. For each pathogen, the detection rate on the y-axis refers to the number of positive patients divided by the total number of patients tested in each age group.

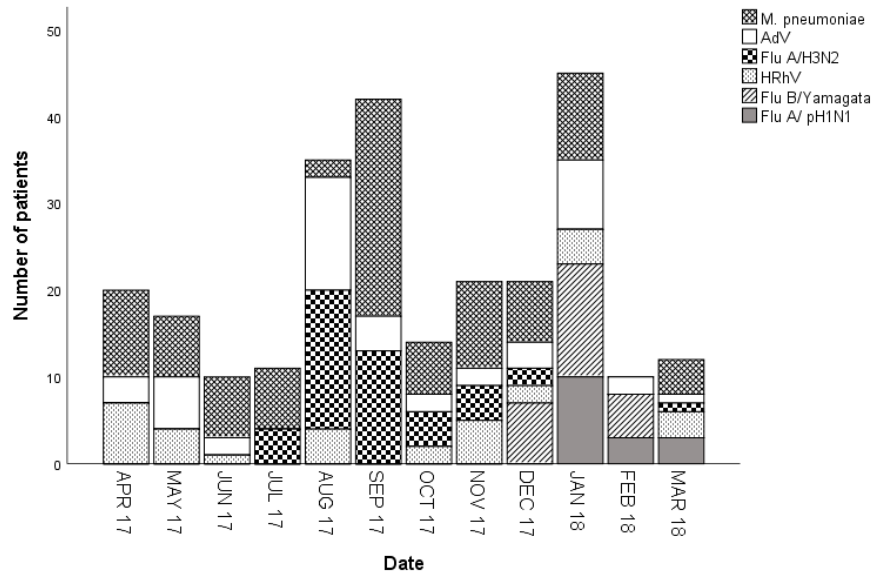

**Fig. 1**—Monthly variations of in the six main pathogens detected among in adult SARI patients in a surveillance hospital in Jinshan, Shanghai, April 2017 to March 2018



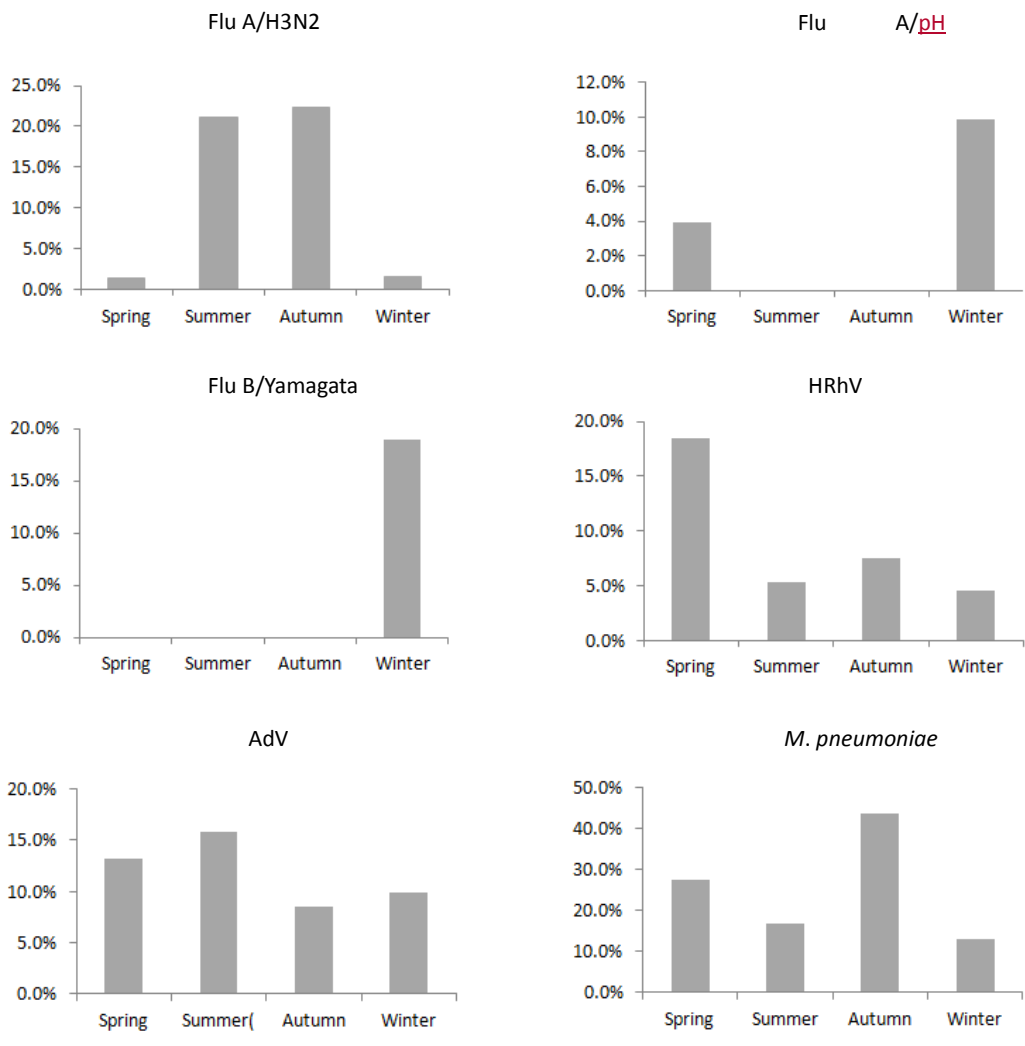

**Fig. 2**—Detection rates of the six main pathogens among-in adult SARI patients in different seasons in a surveillance hospital in Jinshan, Shanghai. Each panel showed the seasonal detection-distribution of one-a pathogen from-in SARI patients. For each pathogen, the detection rate at-on the y-axis referred to the number of positive patients divided by the total number of

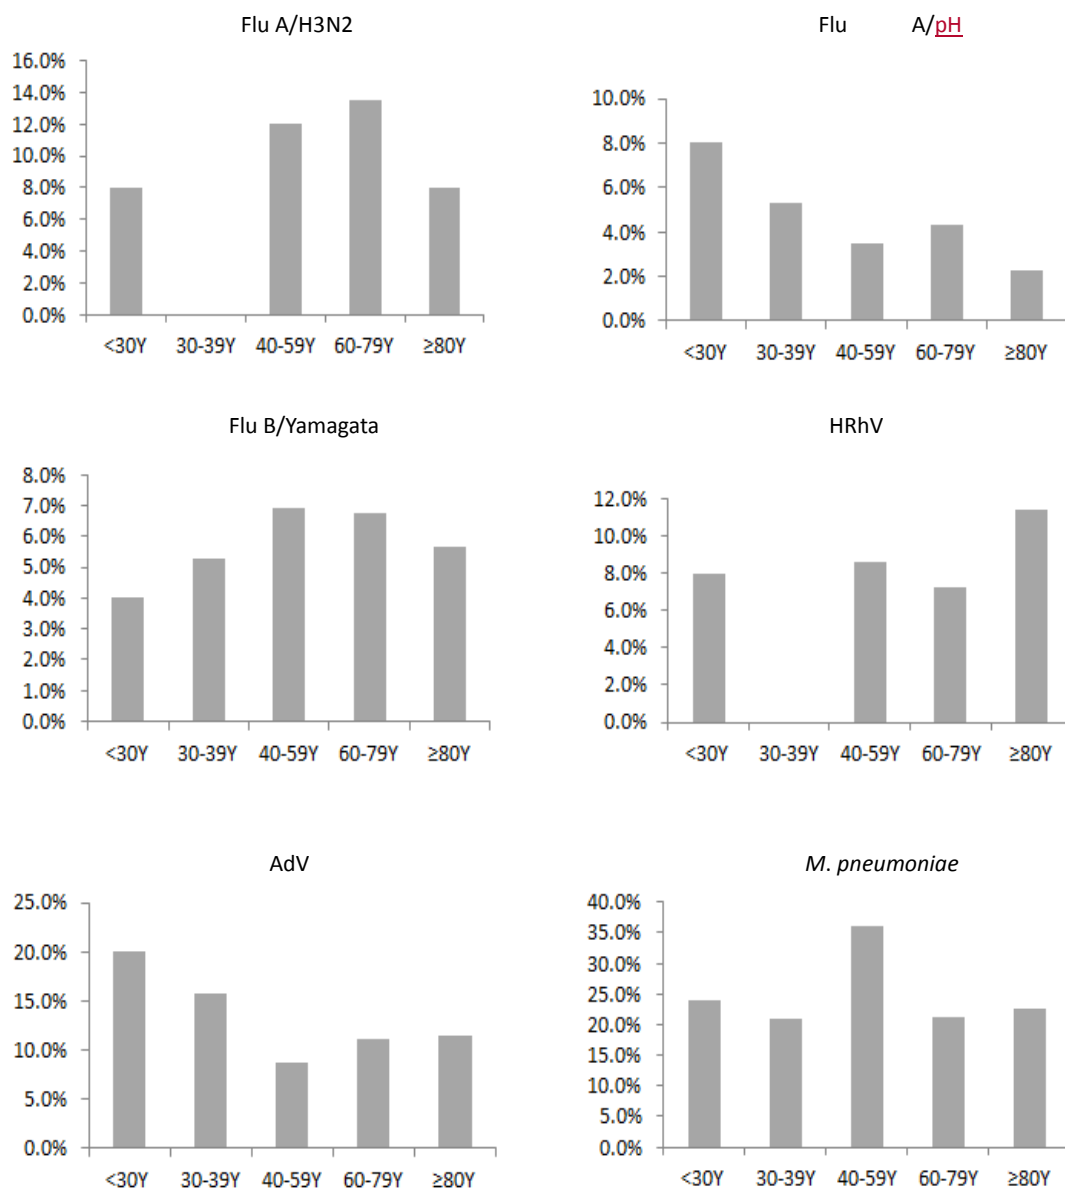

**Fig. 3 –Detection rates of the six main pathogens among-in SARI patients according to age groups in a surveillance hospital in Jinshan, Shanghai, April 2017 to March 2018.** Each panel showed the age-group-specific detection rate of one pathogen from-in SARI patients. For each pathogen, the detection rate at-on the y-axis referred to the number of positive patients divided by the total number of patients tested in an-each age group.

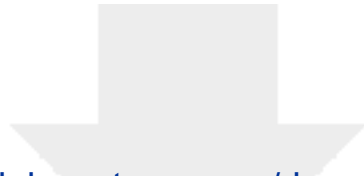

[Click here to access/download](#)

**Supporting Information**

[STROBE\\_checklist\\_v4\\_combined\\_PlosMedicine.docx](#)

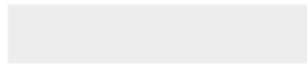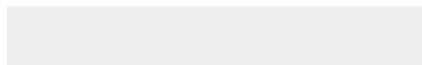

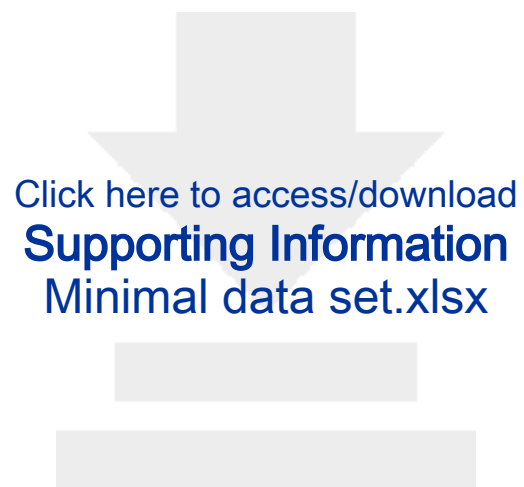

Click here to access/download  
**Supporting Information**  
Minimal data set.xlsx

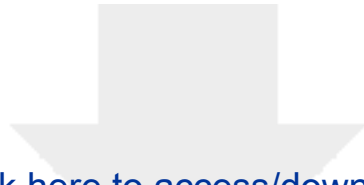

[Click here to access/download](#)

**Supporting Information**

Sequences of primers targeting Flu AB.doc

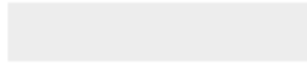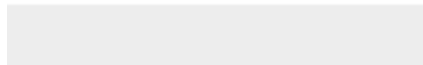

1 **Etiological and Epidemiological ~~Characters~~Characteristics of Severe Acute**  
2 **Respiratory Infection Caused by Multiple Viruses and *Mycoplasma Pneumoniae***  
3 **in Adult Patients in Jinshan, ~~of~~ Shanghai: A Pilot Hospital-based Surveillance**  
4 **Study**

5 Jian Li<sup>1†</sup>, Can-Lei Song<sup>2†</sup>, Tang Wang<sup>2†</sup>, Yu-Long Ye<sup>3</sup>, Jian-Ru Du<sup>3</sup>, Shu-Hua Li<sup>2</sup>, Jian-Min Zhu<sup>2</sup>

6 <sup>†</sup> [These authors contributed equally to this work.](#) ~~Contributed equally~~

7 <sup>1</sup>*Clinical Research Center, Ruijin Hospital, Shanghai Jiao Tong University School of Medicine,*  
8 *Shanghai, China–*

9 <sup>2</sup>*Department of Acute Infectious Diseases Control, Jinshan District Center for Diseases Control*  
10 *and Prevention, Shanghai, China*

11 <sup>3</sup>*Department of Microbiology, Jinshan District Center for Diseases Control and Prevention,*  
12 *Shanghai, China*

13 **Email addresses:**

14 Jian Li : nlijian@163.com

15 Can-Lei Song: 629309340@163.com

16 Tang Wang: 1090595528@qq.com–

17 Yu-Long Ye: yeyulong99@163.com

18 Jian-Ru Du: 646947222@qq.com

19 Shu-Hua Li: hsli167@163.com

20 Jian-Min Zhu: zhujm12@163.com

21 **Corresponding author:**

22 Dr. Jian Li: Clinical Research Center, Ruijin Hospital, Shanghai Jiao Tong University School of

23 Medicine, 197 Ruijin Er Rd, Huangpu District, Shanghai, China, 200025

24 Dr. Jian-Min Zhu: Department of Acute Infectious Diseases Control, Jinshan District Center for  
25 Diseases Control and Prevention, 94 Weisheng Rd, Jinshan District, Shanghai, China, 201599

26

## 27 **Abstract**

### 28 **Background**

29 Severe acute respiratory infection (SARI) ~~presents results in~~ a tremendous disease burden  
30 worldwide. Available research on ~~the~~ active surveillance ~~of among~~ hospitalized adult patients  
31 ~~suffered~~ suffering from SARI in China ~~was~~ is limited. This **pilot** study aimed to identify associated  
32 etiologies and describe the demographic, epidemiological and clinical profiles of hospitalized  
33 SARI-~~associated~~ patients aged over 16 years ~~old~~ in Jinshan, Shanghai.

### 34 **Methods**

35 Active surveillance was conducted at 1 sentinel hospital in Jinshan district, Shanghai, from April  
36 2017 to March 2018. Hospitalized SARI patients aged over more than 16 years ~~old~~ were enrolled,  
37 ~~the~~ and **nasopharyngeal** swabs were collected within 24 hours of admission and tested for multiple  
38 respiratory viruses (including 18 common viruses) and *Mycoplasma pneumoniae* (*M. pneumoniae*)  
39 with real-time polymerase chain reaction. Demographic, epidemiological and clinical information  
40 ~~were~~ was obtained from case report forms.

### 41 **Results**

42 ~~Of In total,~~ 397 SARI patients were enrolled; the median age was 68 years, and 194 (48.9%)  
43 patients were male. A total of 278 (70.0%) patients had at least one underlying chronic medical  
44 ~~conditions~~ condition. The most frequent ~~symptom was~~ symptoms were cough (99.2%) and sputum

45 production (88.4%). The median duration of hospitalization was 10 days. A total of 250 infection  
46 patients (63.0%) were positive identified as for having at least one positive pathogen infection, of  
47 whom 198 (49.9%) ~~were had~~ were positive for a single infection-pathogen and 52 (13.1%)  
48 ~~were had~~ were positive for multiple infections pathogens. The pathogens identified most frequently  
49 were *M. pneumoniae* (23.9%, 95/397), followed by adenovirus (AdV) (11.6%, 46/397), influenza  
50 virus A/H3N2 (Flu A/H3N2) (11.1%, 44/397), human rhinovirus (HRhV) (8.1%, 32/397),  
51 influenza virus B/Yamagata (Flu B/Yamagata) (6.3%, 25/397), pandemic influenza virus A/H1N1  
52 (Flu A- $\alpha$ H1N1) (4.0%, 16/397), parainfluenza virus (PIV)  $\alpha$ Type 1 (2.0%, 8/397), human  
53 coronavirus (HCoV)  $\alpha$ Type NL63 (2.0%, 8/397), HCoV  $\alpha$ Type 229E (1.5%, 6/397), HCoV  $\alpha$ Type  
54 HKU1 (1.5%, 6/397), PIV  $\alpha$ Type 3 (1.5%, 6/397), human metapneumovirus (HMPV) (1.5%,  
55 6/397), PIV  $\alpha$ Type 4 (1.3%, 5/397), HCoV  $\alpha$ Type OC43 (1.0%, 4/397), influenza virus B/Victoria  
56 (Flu B/Victoria) (0.5%, 2/397), respiratory syncytial virus (RSV)  $\alpha$ Type B (0.5%, 2/397), and  
57 human bocavirus (HBoV) (0.3%, 1/397). The seasonality of pathogen-confirmed SARI patients  
58 ~~conformed had to~~ a bimodal shaped distribution, with the first peak in summer and the second peak  
59 in winter. ~~The statistically~~ Statistically significant differences were observed with respect to the  
60 proportion rates of ~~s of~~ dyspnea, radiographically diagnosed ~~dis of~~ pneumonia and the presence of at  
61 least one comorbidity among-in patients who ~~were were~~ single-infected ~~by with only~~ M.  
62 pneumoniae, AdV, HRhV, Flu A/H3N2, Flu A  $\alpha$ /H1N1 ~~and or~~ Flu B/Yamagata. The differences  
63 ~~of in~~ the positive rates of the above 6 main pathogens among the different age groups were not  
64 statistically-significant.

## 65 Conclusions

66 *M. pneumoniae*, AdV and Flu A/H3N2 were the leading-main pathogens detected among-in



67 hospitalized SARI patients aged more than 16 years ~~old~~ in Jinshan district, Shanghai. Our ~~finding~~  
68 ~~highlights~~findings highlight the importance of ~~sustaining-sustained multi-pathogen~~multipathogen  
69 surveillance ~~of-among~~ SARI patients in sentinel hospitals, which can ~~provides~~provide useful  
70 information on SARI etiologiesy, epidemiology, and clinical characteristics.

71 **Key words:** Severe acute respiratory infection, sentinel surveillance, pathogen, epidemiology

## 72 **Background**

73 Severe acute respiratory infection (SARI) has been considered an important ~~cause-contributor to~~of  
74 morbidity and mortality ~~in~~in all age ~~groups~~worldwide, particularly ~~in~~ children, ~~the~~ elderly  
75 individuals and individuals with compromised immune, cardiac and pulmonary systems,  
76 worldwide [1-3]. It is estimated that SARI ~~caused~~causes approximately 4.2 million ~~of~~ deaths  
77 annually. Of these, up to 90% are believed to occur in developing countries [4]. Various viral and  
78 bacterial pathogens are associated with SARI. Due to their extremely high potential ~~to~~for  
79 human-to-human transmission, these pathogens pose a substantial risk to human health. While  
80 bacterial infections ~~exert~~has a critical-substantial influence on ~~causing-the development of~~ severe  
81 pneumonia [5], a significant proportion of ~~SARISARIs~~ are attributed to viral ~~infections-pathogens~~,  
82 such as influenza viruses A and B (Flu A/B), parainfluenza viruses (PIV), adenoviruss (AdVs),  
83 respiratory syncytial viruses (RSVs), human coronaviruses (HCoVs) and human rhinoviruss  
84 (HRhVs) [6]. Nevertheless, ~~owing to the lack of gold standard diagnostic methods to swiftly~~  
85 rapidly identify~~determine~~ etiological agents, most ~~of-the~~ patients ~~may-be~~are treated with  
86 antibiotics empirically [7]. Rapid etiologic diagnosis therefore remains a significant public health  
87 challenge.

88 Routine pathogen monitoring is critical for preparedness for and response to the SARI epidemic

89 ~~of SARI~~. Since SARI is the leading cause of hospitalization in children under the age of 5 years  
90 and of febrile episodes in infants younger than 3 months old, ~~most available studies regarding the~~  
91 ~~burden of SARI focus on the viral~~ ~~uses infections~~ ~~of in~~ children [8-11]. A ~~study of~~ SARI  
92 surveillance study in China revealed that 90% of patients were aged <15 years [12]. ~~Besides,~~ In  
93 addition, the majority of the data on the epidemiology of the etiologic agents of SARI ~~come was~~  
94 ~~collected in from more~~ developed regions. The ~~Epidemiological~~ ~~characterizations~~ characteristics  
95 and distributions s of the major viral ~~agents~~ pathogens in adult SARI patients are still limited in  
96 developing regions [13]. *Mycoplasma pneumoniae* (*M. pneumoniae*) has long been considered an  
97 important etiology of respiratory disease, and is more frequently isolated among children and  
98 young adults [14, 15]. ~~Limited~~ R ~~research is available on the~~ active surveillance ~~of in~~ hospitalized  
99 adult patients ~~suffered~~ suffering from SARI in China is scarce. ~~In response~~ Accordingly, a ~~piloting,~~  
100 study on active surveillance ~~system for of~~ SARI ~~had been was~~ initiated to ~~address~~ characterize the  
101 community acquired pulmonary infections and ~~conduct~~ epidemiologic and etiologic ~~monitor~~  
102 the ing epidemiologic and etiologic characteristics of SARI caused by various viral pathogens and  
103 *M. pneumoniae* in adult inpatients in Jinshan district, Shanghai ~~since,~~ in April 2017. The aim of  
104 the present study ~~is was~~ to characterize the demography cy and epidemiologic characteristics y of  
105 SARI, ~~to~~ identify the etiologies and ~~to~~ assess the clinical profiles ~~of~~ associated with SARIs in  
106 hospitalized adult patients in Jinshan, Shanghai, during by performing 12 months of active  
107 surveillance.

## 108 **Materials and methods**

### 109 **Study setting**

110 Jinshan district is a suburb ~~and~~ located in southwest Shanghai, P.R. China. Active S surveillance

111 was ~~piloted-initiated~~ at Jinshan ~~district central hospital since~~ District Central Hospital in April 2017  
112 and ~~lasted-was conducted~~ for 12 months. This hospital was selected ~~as~~because it is one of the  
113 largest general hospitals in the district and ~~also the-a~~ national surveillance sentinel ~~site~~ for  
114 influenza ~~virus~~. It serves most of ~~the~~ population of Jinshan district, ~~\_~~with a total of 636 beds. In  
115 2017, the registered population in Jinshan district was 523,641, of which 467,320 (89.24%) were  
116 adults aged more than 18 years [16].

### 117 Study subjects

118 All patients ~~aged~~ over 16 years ~~old~~ who were admitted to ~~the intensive care unit, respiratory~~  
119 ~~medicine department and general wards in the sentinel-hospital~~ were screened by a trained  
120 physician between April 2017 and March 2018. Patients were ~~defined-diagnosed as~~ with SARI  
121 ~~cases~~ according to ~~the~~ World Health Organization (WHO) definition, ~~which includes if they~~  
122 ~~have had~~ acute respiratory infection with ~~a~~ measured fever of  ~~$\geq 38^{\circ}\text{C}$~~  $\geq 38^{\circ}\text{C}$ , ~~cough onset within~~  
123 ~~the last 10 days and require~~required hospitalization [1].

### 124 Data collection

125 After hospital admission, a standard case report form was completed for each eligible patient. The  
126 form comprised information on demographic characteristics (sex, age, weight, height, residence),  
127 ~~vaccination (received a~~ing influenza vaccine 1 year before illness onset, ~~and ever received a~~  
128 ~~pneumococcal conjugate vaccine)~~, ~~admission~~ing diagnosis, comorbidities (asthma, chronic  
129 bronchitis, chronic obstructive pulmonary disease (COPD), hypertension, diabetes, cardiovascular  
130 disease, tumor), clinical presentation (fever, cough, difficult breathing, sore throat), antibiotic  
131 treatments prior ~~to~~ hospitalization, exposure history (smoking, visiting a live poultry market,  
132 contact with live poultry, contact with ~~a~~ patient with fever and respiratory symptoms ~~during within~~

133 2 weeks before illness onset). At discharge, the form was updated to include information ~~on~~ about  
134 treatment ~~accepted~~ in the hospital, chest computed tomographic (CT) ~~scans~~ findings, complications  
135 and prognosis. Data were collected by the trained physician. To ensure the accuracy of the data,  
136 spouses or caregivers who lived with the patients for more than 2 weeks before illness onset were  
137 interviewed, and the medical records of the patients were reviewed ~~as well~~. Two radiologists  
138 interpreted chest CT scans independently. ~~When~~ In the case of a disagreement ~~arose~~, a third  
139 radiologist was consulted to reach a final decision. All the ~~information that could identify the~~  
140 ~~personality of patients was masked during or after data~~ collection.

#### 141 **Specimen collection and laboratory testing**

142 A single ~~flocked polyester nasopharyngeal swab (Becton Dickinson, USA, MD)~~ sample was  
143 collected from each SARI patient by a nurse within 24 hours of admission following a standard  
144 procedure. The swab was inserted into a cryovial containing 3 ~~3 ml~~ ml of viral transport medium  
145 (~~Tiandz, China, Beijing~~). The specimens were stored at ~~4°C~~ 4°C in the hospital and transferred  
146 ~~within 24 hours of collection~~ to the laboratory at Jinshan ~~district center for disease control and~~  
147 ~~prevention~~ District Center for Disease Control and Prevention (CDC), where they were preserved  
148 at ~~-70°C~~ -70°C until ~~testing was~~ were performed. ~~Viral RNA and DNA~~ A total of ~~were extracted~~  
149 from ~~200-µl samples were adopted~~ used to extract viral RNA and DNA using the QIAamp Viral  
150 ~~RNA/DNA Mini Kit (Qiagen, Hilden, Germany) following the manufacturer's~~  
151 ~~instruction~~ instructions. To guarantee integrity, specimens were lysed ~~at~~ under denaturing  
152 ~~conditions to deactivate RNases [1]. Pure viral RNA and DNA were eluted in 60 µl of low-salt~~  
153 ~~buffer, and, whereas~~ impurities were removed. ~~Viral nucleic acid extracts were further processed~~  
154 ~~by multiplex real-time reverse transcription polymerase chain reaction (RT-PCR). The qualitative~~

155 RespiFinder 2SMART multiplex real-time RT-PCR diagnostic strategy (GeneDx, Shanghai,  
156 China) was adopted to detect 15 respiratory pathogens, including PIV (types 1, 2, 3 and 4), HCoV  
157 (types 229E, OC43, HKU1 and NL63), RSV (types A and B), HRhV, AdV, human  
158 metapneumovirus (HMPV), human bocavirus (HBoV) and *M. pneumoniae*, using the CFX96™  
159 Real-time PCR System (Bio-Rad, Hercules, CA, USA) according to the manufacturer's  
160 protocols. Besides, RNA from each specimen was identified for specific primers and  
161 probes that target Flu A/B using another real-time RT-PCR following the US CDC's protocol.  
162 Specimens found that were positive for Flu A and Flu B were subsequently sub-typed for  
163 pandemic influenza virus A/H1N1 (Flu A- $\nu$ H1N1) and seasonal influenza virus A/H3N2 (Flu  
164 A/H3N2); together with Flu B-Yamagata-B/Yamagata and Flu B-VictoriaB/Victoria,  
165 respectively [17]. These testing tests were performed in bio-safety the biosafety level 2 laboratory  
166 of the Jinshan CDC.

## 167 Statistics

168 The collected data were double-entered into a database constructed by in EpiData 3.1. Logical  
169 checking for to assess the quality of data entry was were conducted. The definition of sSingle  
170 infection referred was defined as to an infection caused by one pathogen, and multiple infections  
171 was defined as an infection caused by at least 2 pathogens (virus/virus, virus/*M. pneumoniae*) in a  
172 single specimen. Continuous data were are reported as the medians and inter-quartile interquartile  
173 ranges (IQRs), and the Mann-Whitney U test was used to compare the difference differences  
174 between groups. Categorical data were are expressed as frequency frequencies and proportions, and  
175 the Chi-squared test or Fisher's exact test, as appropriate, were was used to compare patients  
176 with and without confirmed pathogen pathogens in terms of demographics, clinical characteristics,

177 epidemiologic characteristics, treatment and prognosis. Bonferroni's correction was used for  
178 ~~pairwise comparison~~comparisons. For proportions, the binomial 95% confidence-~~interval~~ was is  
179 reported. The analysis was performed using SPSS v. 25.0 (IBM Corporation, Armonk, NY, USA),  
180 and all tests were ~~performed~~ two-sided ~~at~~ with a 5% significance level.

## 181 **Ethics statement**

182 ~~This study belonged~~ was to the part of the hospital-based SARI surveillance program ~~of SARI~~  
183 ~~of~~ in Shanghai, and was approved by the ethical review committee of the Shanghai Municipal  
184 Center for Disease Control and Prevention (Ref #: 2015-14). Written informed consent was  
185 obtained from patients or proxies before enrollment, and from parents or guardians ~~for~~ of those  
186 under 18 years old. This study was conducted in accordance with the Declaration of Helsinki.

## 187 **Results**

### 188 **Demographic characteristics**

189 From April 2017 to March 2018, a total of 397 patients meeting the SARI case definition were  
190 admitted to our ~~sentinel site~~hospital, ~~of whom~~ One or more pathogens were detected from in 250  
191 patients (63.0%; 95% CI: 58.2-67.7%), and ~~the negative results were found~~ obtained from in the  
192 ~~rest of~~ remaining 147 patients. The median age of the patients ~~were~~ was 68 years (IQR: 59-78;  
193 range: 16 to 99 years). Among the SARI patients, 194 (48.9%) were male, and 203 (51.9%) were  
194 female. ~~The majorities~~ majority of patients were ~~the elderly~~ elderly patients aged equal to or more  
195 ~~than~~ 60 or more years (295 cases), and ~~accounted for~~ 74.3% of the total patients; 58 (14.6%)  
196 patients were 40-59 years of age, and 19 (4.8%) patients were 30-39 years of age. Those less than  
197 30 years old represented only 6.3% of the total patients (25 cases). ~~The~~ The ~~A~~ percentages of  
198 patients with a body mass index (BMI) <20, between 20 and 25, and >25 ~~accounted for~~ were

199 29.7%, 52.4% and 17.9%, respectively. ~~A total of 278 SARI patients (70.0%) had at least one~~  
200 ~~comorbidity, and 119 patients suffered had no comorbidity (Table 1). The difference in~~  
201 ~~proportion of gender differences in the proportions. There were no significant differences in of sex,~~  
202 age, BMI and underlying chronic medical conditions between SARI patients with confirmed  
203 ~~pathogen pathogens~~ and those without confirmed ~~pathogen pathogens~~ ~~did not show any statistical~~  
204 ~~significance~~ ( $P > 0.05$ ).

### 205 **Etiologies**

206 Of ~~the~~ 397 SARI patients, 198 (49.9%; 95% CI: 45.0-54.8%) ~~patients were identified as having~~  
207 ~~ahad~~ single infection, ~~and while~~ 52 (13.1%; 95% CI: 9.8-16.4%) ~~patients were documented as had~~  
208 ~~having~~ multiple infections. The ~~most prevalent pathogen identified werewas~~ *M. pneumoniae* in 95  
209 (23.9% of the total samples) ~~cases patients~~, followed by AdV in 46 (11.6%) ~~samples patients~~, Flu  
210 A/H3N2 in 44 (11.1%) ~~samples patients~~, HRhV in 32 (8.1%) ~~samples patients~~, Flu B/Yamagata in  
211 25 (6.3%) ~~e samples patients~~, and Flu A /pH1N1 ~~in~~ 16 (4.0%) ~~samples patients~~. Other viruses,  
212 including PIV ~~t~~Type 1, HCoV ~~t~~Type NL63, HCoV ~~t~~Type 229E, HCoV ~~t~~Type HKU1, PIV ~~t~~Type 3,  
213 HMPV, PIV ~~T~~type 4, HCoV ~~t~~Type OC43, Flu B/Victoria, RSV ~~t~~Type B and HBoV, ~~were detected~~  
214 ~~in a proportion ranging from 0.3% to 2.0% of infection samples (Table 2). The most frequently~~  
215 detected pathogens in patients with multiple ~~infection infections~~ were *M. pneumoniae* (84.6%,  
216 44/52), AdV (28.8%, 15/52), HRhV (25.0%, 13/52), and Flu A/H3N2 (17.3%, 9/52).

### 217 **Clinical and epidemiologic characteristics**

218 Pneumonia (222 cases, 55.9%) was the most common clinical diagnosis made by clinicians on  
219 admission ~~and~~ followed by bronchiolitis (68 cases, 17.1%). The most common  
220 ~~symptoms symptoms~~ on admission ~~was were~~ cough (99.2%) and sputum production (88.4%),

221 followed by thoracalgia (7.1%) and pharyngalgia (6.8%). ~~Of the 397 SARI patients,~~ a temperature  
222  $\geq 39^{\circ}\text{C}$  was recorded in ~~189 SARI patients (47.6%)~~ on admission. A total of 382 patients (96.2%)  
223 ~~had the~~ underwent chest CT ~~performed, in which of whom~~ 258 (67.5%) were reported to have ~~the~~  
224 ~~presence of~~ radiographic evidence of pneumonia; ~~and the residual~~ remaining 15 patients ~~didn't~~  
225 ~~accept the~~ did not undergo chest CT examination. Thirty-two SARI patients had ~~exposures~~  
226 ~~with~~ exposure to a patient with fever and respiratory symptoms ~~patients,~~ while 30 SARI patients  
227 ~~contacted~~ had contact with live poultry 2 weeks before ~~their~~ illness onset. ~~Within~~ Among the 397  
228 patients, only 5 patients had received a pneumococcal conjugate vaccine, and 1 patient was  
229 vaccinated against Flu, respectively influenza (Table 3). No significant differences in the  
230 proportions of clinical and epidemiologic characteristics between SARI patients with confirmed  
231 ~~pathogen~~ pathogens and those without confirmed ~~pathogen~~ pathogens were ~~attained~~ found, except  
232 for chest radiographic examination findings. ~~As illustrated in table~~ Table 4, the differences of in the  
233 proportions of dyspnea, radiographic diagnosis of pneumonia and the presence of at least one  
234 comorbidity among patients those single-infected patients by with only one of the 6 kinds of main  
235 pathogens, including *M. pneumoniae*, AdV, HRhV, Flu A/H3N2, Flu A /pH1N1, and Flu  
236 B/Yamagata, were statistically significant. Notably, the proportion of patients with the presence of  
237 radiographic evidence of pneumonia was ~~the~~ highest in patients infected by *M. pneumoniae*  
238 (74.5%), and dyspnea was the most common presentation in patients with HRhV (21.1%).

### 239 Seasonal trends

240 Figure 1 showed ~~shows the~~ monthly variations in the number of SARI ~~patient~~ patients infected  
241 ~~identified as having with~~ *M. pneumoniae*, AdV, Flu A/H3N2, Flu A /pH1N1, HRhV, and Flu  
242 B/Yamagata ~~infection~~ infections. Over the 12-month period, the temporal distribution of



243 pathogen-confirmed SARI patients had a bimodal shape, with the first peak in the summer and the  
244 second peak in the winter. The duration of the first positive peak was 2 months, from August to  
245 September, but the second peak ~~only~~ lasted only for 1 month. ~~Peaks of The~~  
246 ~~pathogenpathogensinfection peaks~~ seemed to be ~~more~~ attributable to the number of *M.*  
247 *pneumoniae* and AdV cases ~~detection. Besides~~ detected. In addition, Flu A/H3N2 ~~was responsible~~  
248 ~~for~~ contributed to the summer peak, whereas Flu B/Yamagata and Flu A/pH1N1 ~~were~~ dominantly  
249 ~~representative of~~ contributed to the winter peak. Unlike other ~~pathogenpathogens~~, HRhV ~~appeared~~  
250 ~~to~~ was ~~be~~ detected all year along and did not show apparent seasonality. ~~Distributions of The~~  
251 distributions of the seasonal ~~patternpatterns~~ of the positivity ~~rates~~ of the main 6 pathogens  
252 ~~were~~ are shown in Figure 2. ~~The prevalence of~~ Flu A/H3N2 prevalence peaked in summer  
253 (Jun-Aug) and autumn (Sep-Nov), with positivity ~~rate~~ being ~~rates of~~ 21.1% (20/95) and 22.3%  
254 (21/94), respectively ( $P>0.05$ ). However, Flu A/pH1N1 and Flu B/Yamagata peaked in winter  
255 (Dec-Feb), with positivity ~~rate~~ being ~~rates of~~ 9.8% (13/132) and 18.9% (25/132), respectively;  
256 ~~and the difference~~ differences were statistically significant ( $P<0.01$ ). ~~It's~~ It is worth noting that no  
257 SARI patients ~~linked to~~ infected by Flu B/Yamagata ~~infection~~ were detected in spring (Mar-May),  
258 summer ~~and~~ or autumn. The positivity rate of *M. pneumoniae* Significantly ~~was significantly~~  
259 higher ~~positive rate of *M. pneumoniae* was observed~~ in autumn (43.6%, 41/94); ~~as compared with~~  
260 than in other ~~season~~ seasons ( $P<0.01$ ). The positivity rate (18.4%, 14/76) of HRhV was  
261 significantly higher in spring ~~had a positive rate (18.4%, 14/76) significantly higher~~ than that ~~of~~ in  
262 the other ~~season~~ seasons ( $P<0.01$ ). The positivity ~~rate~~ of AdV did not demonstrate obvious  
263 seasonality throughout the year ( $P>0.05$ ).

## 264 Age distribution

265 The age group distributions of ~~the~~ positivity rates of ~~the~~ main pathogens, ~~in SARI patients~~  
266 ~~identified as~~ *M. pneumoniae*, AdV, Flu A/H3N2, Flu A/pH1N1, HRhV, and Flu B/Yamagata,  
267 ~~infection were~~ are shown in Figure 3. The prevalence rates of Flu A/pH1N1 (8.0%) and AdV  
268 (20.0%) peaked in the group younger than 30 year years old, although the difference was not  
269 significant ( $P>0.05$ ). The positivity rate rates of *M. pneumonia* (36.2%) and Flu B/Yamagata  
270 (6.9%) were the highest in the ~~group of 40-59-year-old-old group~~, without statistical significance  
271 ( $P>0.05$ ). Moreover, no significant differences ~~between among the~~ different age groups ~~was were~~  
272 observed with regard to the positivity rates of Flu A/H3N2 and HRhV. Interestingly, no patients  
273 infected with Flu A/H3N2 and HRhV were detected in ~~the 30- to 39-year-old group~~.

#### 274 **Treatment and prognosis**

275 The median duration from illness onset to admission ~~for in~~ SARI patients was 3 days (IQR: 2-5.5;  
276 range: 0 to 14 days), and ~~the~~ median duration of hospitalization was 10 days (IQR: 8-13 days).  
277 Complications ~~were present~~ occurred in 61 SARI patients, with electrolyte metabolism disorder  
278 (19 cases), respiratory failure (14 cases) and cardiac insufficiency (8 cases) being the most  
279 common ~~as compared with other~~ complications. ~~The remainder~~ remaining 336 patients ~~didn't~~ did  
280 not report any complications. No significant differences between SARI patients with confirmed  
281 ~~pathogen~~ pathogens and those without confirmed ~~pathogen~~ pathogens were observed with regard to  
282 the use of antibiotics (levofloxacin, cephalosporin, azithromycin), antivirals (oseltamivir),  
283 ~~glucocorticoid~~ glucocorticoids and oxygen therapy ( $P>0.05$ ). The duration of antibiotic use during  
284 hospitalization was 1-15 days (median: 9 days [IQR 5-11]) ~~for in~~ SARI patients without confirmed  
285 ~~pathogen~~ pathogens and 1-20 days (median: 9 days [IQR 6-11]) ~~for in~~ those with confirmed  
286 ~~pathogen~~ pathogens, ~~with though the difference being~~ was non insignificant ( $P=0.68$ ). Three SARI

287 patients died during hospitalization (Table 5).

## 288 Discussion

289 Hospital-based sentinel surveillance ~~associated with~~ SARI can ~~provide~~ be used as a ~~mechanism~~  
290 strategy to monitor trends in this relatively severe disease and is critical for establishing a platform  
291 to understand the epidemiologic and etiologic profiles at the local level. A monitoring study ~~with~~  
292 ~~regard to~~ involving SARI patients in Georgia demonstrated that the proportions of patients positive  
293 for respiratory pathogens varied widely between seasons; ~~there was~~; ~~from~~ no influenza positive for  
294 any detected ~~of influenza~~ in summer and early autumn (from July to October) ~~to~~ but a 30% ~~for~~  
295 RSV positivity rate in ~~from~~ March ~~in~~ 2015–2017 [1]. Another surveillance study ~~of~~ involving  
296 SARI patients in several countries ~~found that the positivity rates of influenza viruses varied~~  
297 widely depending on country and season, from 2.1% in Armenia in 2011–2012 to 100% in Albania  
298 in 2009–2010 [18]. A comparative study of viral ~~profile~~ profiles in hospitalized pediatric SARI  
299 ~~children patients~~ in Beijing and Shanghai, China, showed different viral profile patterns ~~of viral~~  
300 ~~profiles in the~~ 2 cities; ~~in which~~ RSV (52.9%) and HRhV/enterovirus (34.7%) were the most  
301 prevalent etiological agents of SARI in Beijing, whereas HRhV/enterovirus (33.6%) and HBoV  
302 (17.7%) were the main pathogens of SARI in Shanghai [10]. The early detection of divergent  
303 SARI pathogens through ~~the~~ sentinel surveillance ~~network~~ can measure the burden of disease on  
304 the basis of severity and better prepare a region for an emergency response. To our knowledge,  
305 this pilot study is the first study to ~~description of~~ continuously surveillance ~~covering~~ 19 respiratory  
306 pathogens ~~among in~~ adult SARI patients in Shanghai, ~~of~~ eastern China, ~~which has~~ providing an  
307 better improved understanding of the epidemiology, etiologic spectrum and clinical profile of  
308 SARI. During 1 year of active surveillance, 397 patients who met the established case definition

309 of SARI were eligible for ~~enrollment~~ enrollment in this study, and 63.0% of ~~these patients were~~ tested positive for at least one pathogen. Our ~~finding~~ findings ~~reached consensus~~ were in   
310 ~~accordance~~ with those reported elsewhere, which revealed etiologies ~~ranging from~~ 50% to 85%   
311 of hospitalized SARI cases [7, 19-20].

313 ~~During the phase I~~ From April 2017 to March 2018 in Jinshan district, the main etiologies of   
314 SARI varied seasonally; ~~and~~ *M. pneumoniae*, AdV, Flu A/H3N2, HRhV, Flu B/Yamagata,   
315 ~~together with~~ and Flu A-pH1N1 were the predominant pathogens depending on the month. Other   
316 viruses, such as PIV (Type 1, HCoV (Type NL63, HCoV (Type 229E, HCoV (Type HKU1, PIV   
317 (Type 3, HMPV, PIV (Type 4, HCoV (Type OC43, Flu B/Victoria, RSV (Type B and HBoV, were   
318 also present, although the numbers of patients infected ~~of~~ with these ~~infrequent viruses was~~ were   
319 relatively small. Since our ~~sentinel surveillance system~~ aimed ~~s to detect SARI~~ a in adult SARI   
320 patients, most of the enrolled patients were ~~the elderly~~ elderly individuals ~~aged between~~ 60-79   
321 years ~~old~~ (52.1%) ~~and those aged~~ 80 years and above (22.2%). Our study demonstrates that   
322 individuals ~~in the over the age of 60~~ age group are the most vulnerable ~~group~~ for suffering from ~~to~~   
323 SARI in Jinshan, a subtropical region. In the present study, at least one chronic medical condition   
324 ~~occurred~~ ~~was present~~ in 70% of SARI patients. Our study population ~~presented~~ ~~had~~ a high   
325 prevalence of comorbidities compared with ~~that in the~~ a study in Hubei ~~province~~ Province, China   
326 [12]; ~~and~~ ~~This~~ may be partially explained by the ~~inconsistence of socio-economic~~ inconsistency   
327 ~~of~~ ~~in~~ socioeconomic development between ~~the~~ 2 regions. Hypertension and cardiovascular disease   
328 ~~was~~ ~~were~~ observed in 38.3% and 7.6% of our population, respectively. ~~And patients~~ ~~Patients~~ with   
329 confirmed ~~pathogen~~ pathogens had a higher prevalence of cardiovascular disease than those   
330 without confirmed ~~pathogen~~ pathogens. One study suggested that diagnosed cardiovascular disease

331 was ~~commonly~~ related to ~~a fatal endpoints-outcome among in~~ influenza-positive SARI ~~eases~~  
332 ~~patients~~ [21]. Our study revealed that the proportions of ~~patients vaccinating who received~~  
333 influenza ~~vaccine~~vaccines and pneumococcal conjugate ~~vaccine~~vaccines ~~was-were~~ quite low, so  
334 ~~the~~ respiratory disease vaccination programs ~~with the target of targeting~~ individuals with  
335 cardiovascular-related ~~diseased~~diseases should be recommended. In this study, most patients  
336 presented with cough, sputum production and fever. These clinical features bear some  
337 resemblance to ~~the report~~those reported in a previous study [1]. It should be ~~alerted~~noted that  
338 empirical ~~use~~administration of antibiotics ~~use~~ during hospitalization occurred in 99% of patients  
339 in the present study due to the unavailability of ~~rapidly~~rapidly pathogen identification determining  
340 ~~etiological diagnose~~tests. The current study found that pneumonia was the main reason for  
341 hospital admission among of SARI patients with SARI (55.9%) and, followed by bronchiolitis  
342 (17.1%) in Jinshan, a region in eastern China. A similar study in northern China showed that  
343 pneumonia (88.95%) and bronchiolitis (6.37%) were also ~~were~~ the top 2 admission  
344 ~~diagnosis~~diagnoses ~~of among~~ SARI patients [22]. HRhV has emerged as an independent causative  
345 agent ~~in of~~ lower respiratory tract infections. ~~So far~~To date, the majority of investigations ~~about on~~  
346 HRhV-associated lower respiratory tract infections in adults ~~focus~~have focused on ~~the~~  
347 immunocompromised ~~eases~~patients [23-25] or those with hospital-acquired pneumonia [26-27].  
348 We compared the ~~single infected patients with single infection groups~~ in terms of signs and  
349 symptoms ~~in this study~~, and the results showed that ~~the~~ dyspnea was the most frequent symptom  
350 (21.1%) ~~for in~~ community-acquired SARI patients infected by HRhV, which was ~~comparatively~~  
351 consistent ~~to~~with the results of a similar multicenter study (30%) in China [28]. *M. pneumoniae* is  
352 an important cause of community-acquired pneumonia. Depending on the setting, 10%-40% of

353 community-acquired pneumonia patients ~~are caused by~~ have ~~are~~ infected with *M. pneumoniae* [20].  
354 Our study also showed that patients infected by *M. pneumoniae* ~~presented~~ had the highest rate of  
355 radiographic evidence of pneumonia (74.5%) compared with those ~~single~~ infected by other single  
356 pathogen~~pathogens~~, ~~which~~ ~~demonstrating~~ ed that community-acquired pneumonia ~~was~~ is a  
357 heterogeneous disease. ~~It was worth noting, of~~ Of ~~Among the 382 SARI patients that~~ who ~~had a~~  
358 underwent chest CT ~~performed, that~~ ~~there was a~~ significant difference ~~of~~ in the proportion of  
359 patients who accepted ~~and~~ chest radiographic examination between SARI patients with confirmed  
360 pathogen~~pathogens~~ and those without confirmed pathogen~~pathogens~~ ~~was~~ statistically significant.  
361 However, ~~the~~ a significant difference ~~of~~ in the proportion of patients presenting a radiographic  
362 diagnosis of pneumonia between SARI patients with confirmed pathogen~~pathogens~~ and those  
363 without confirmed pathogen ~~were~~pathogens was not observed, ~~which~~ ~~suggesting~~ ed that the  
364 etiologies and disease courses of community-acquired pneumonia were highly variable.

365 *M. pneumoniae* (23.9%) was the most common pathogen in the present study. The positive  
366 detection rate of *M. pneumoniae* ~~echoed~~ was similar to ~~the~~ published data rate (19.7%) in  
367 ~~north~~ northern China [20]. A prospective study ~~conducted~~ in Hong Kong ~~among~~ including adults  
368 hospitalized with pneumonia ~~in~~ from 2004 to 2005 found that *M. pneumoniae* was detected in  
369 78/1,193 patients (6.5%) [29]. *M. pneumoniae* occurs endemically worldwide in many different  
370 geographic ~~elimates~~ regions.- *M. pneumoniae* was mostly detected in autumn (43.6%) and spring  
371 (27.6%) in our study, but *M. pneumoniae* in Istanbul was more commonly identified in summer  
372 (44.9%) and winter (22.4 ~~%~~ 4%) [30]. As the second most common pathogen in this study, the  
373 positiv~~ity~~ rate of AdV did not significantly differ ~~along with~~ ~~season~~ ~~changes~~ seasonal  
374 changes seasonally; ~~and~~ this trend in seasonality was consistent with ~~previous~~ the previously

375 reported ~~AdV seasonality of data from the AdV detecting detection rate in~~ China [10]. In contrast  
376 with the seasonality of ~~viral SARI~~ observed in Georgia in 2015-2017 and in northern China in  
377 2014-2016, where ~~at the~~ distinct winter-only ~~influenza~~ peak ~~of influenza circulation~~ was observed  
378 [31,32], we found ~~that~~ influenza peaked ~~both in both the~~ winter and in summer. Overall, influenza  
379 virus was common in this study, with Flu A/H3N2 dominating in summer, and Flu B/Yamagata  
380 and Flu A/pH1N1 dominating in winter. ~~According to Our findings, found that the positivity~~  
381 ~~rate of Flu B/Yamagata (18.9%) were was~~ nearly twice that of Flu A/pH1N1 (9.8%) in winter,  
382 ~~which this result~~ was different from ~~one that of a~~ study in ~~the~~ USA in which estimated excess  
383 hospitalization rates associated with ~~Flu-influenza~~ B were lower than ~~for those associated with~~ Flu  
384 A/H3N2 [33]. In this study, we also noted that no ~~statistical significant~~ differences ~~were was were~~  
385 found in the ~~positivity rates of pathogens identified as~~ *M. pneumoniae*, AdV, Flu A/H3N2, Flu A  
386 /pH1N1, HRhV, and Flu ~~B/Yamagata among B/Yamagata among the~~ different age ~~group groups~~.  
387 This ~~phenomenon-result~~ was basically the same as ~~that in the~~ previous study in China [10], and  
388 may be attributable to susceptibility to these common viruses in different age ~~group groups~~ of  
389 adults. As reported elsewhere [34], ~~co-infections~~ ~~coinfections~~ were ~~found~~ relatively common in ~~the~~  
390 present study. ~~A total of~~ 13.1% of SARI patients were reported to have more than one pathogen  
391 infection; ~~this, and the~~ percentage was consistent with ~~the finding of that in a~~ previous study  
392 (11.7%) [19].

### 393 Limitations

394 Our study was subject to several limitations. First, as a pilot ~~project study~~, this study was  
395 ~~conducted~~ at only 1 hospital, ~~although~~ ~~Even though~~ this hospital is the ~~biggest largest~~ hospital in  
396 the ~~district~~, ~~so~~ the ~~finding findings~~ may have relatively limited generalizability. ~~Actually, the~~ ~~The~~

397 prevalence of each pathogen may vary ~~at in~~ regions ~~having with~~ different ~~climate~~ climates,  
398 demographic patterns and ~~accessibility to~~ healthcare. Second, the result was based on SARI  
399 surveillance ~~of over~~ a 12-month period, and the burden ~~derived due to from~~ SARI may not reflect  
400 the ~~actual~~ situation over several years. ~~Third, the case report form in this study is was the a~~  
401 ~~standard structured a~~ questionnaire, and ~~just only~~ the results were collected ~~the result to determine~~  
402 ~~whether~~ ~~has the presence of~~ ~~there~~ the patient had received ~~was a~~ radiographic diagnosis of  
403 pneumonia. It was impossible to pinpoint the type of pneumonia, such as ~~the~~ lobar pneumonia ~~and~~  
404 ~~or~~ atypical pneumonia. The pathogens ~~tested detected~~ in this piloting study ~~only covered~~ ~~only~~  
405 common respiratory viruses and *M. pneumoniae*, and did not include related respiratory  
406 ~~bacterium~~ bacterial pathogens, such as *Pneumococcus* and *Bordetella pertussis*, owing to limited  
407 financial support, so ~~the~~ SARI patients without confirmed ~~pathogen~~ pathogens may ~~indicate~~ ~~have~~  
408 ~~been positive for other~~ ~~non tested~~ ~~nontested~~ bacterial ~~etiology~~ ~~etiologies~~ pathogens. Indeed, the  
409 inclusion of ~~bacterium~~ bacterial surveillance is under consideration ~~to integrate~~ ~~for integration~~ into  
410 our program.

## 411 Conclusions

412 In conclusion, the current study ~~is was~~ the first ~~study which monitors to monitor~~ hospitalized  
413 adult SARI patients for most respiratory viruses and *M. pneumoniae* in Shanghai; and ~~confirm~~ ~~eds~~  
414 that multiple respiratory pathogens may circulate among the SARI population and vary with ~~the~~  
415 climatic and demographic characteristics. ~~The~~ ~~This~~ finding highlights the importance of  
416 ~~sustained~~ ~~ing~~ sentinel surveillance of SARI ~~patients~~ at the local and national levels, which can  
417 ~~contribute to guide~~ accurately ~~evaluate~~ ~~evaluations of~~ ~~ng~~ the prevalence of ~~etiological agents of~~  
418 ~~associated to with~~ SARI and the burden of disease; and, ~~most more~~ importantly, ~~to shape~~ ~~shaping~~



419 public polic~~iesy~~ on SARI prevention and responses to SARI activity.

## 420 Supporting information

421 S1 File. Minimal data set.

422 S2 File. Sequences of primers targeting Flu A/B used in real-time RT-PCR.

## 423 Acknowledgment~~Acknowledgements~~

424 We would like to express our gratitude to the physicians and nurses from Jinshan ~~district central~~  
425 ~~hospital~~District Central Hospital for their significant contribution to the data collection and  
426 specimen collection.

## 427 **Funding**

428 This work was supported by the Research Project of Shanghai Municipal Health Commission  
429 (201940428) and the Infectious Disease and Epidemiology Project of the 6<sup>th</sup> Jinshan District  
430 Medical Key Specialty Construction (JSZK2019B05). The funder had no role in the study design,  
431 data collection and analysis, decision to publish or preparation of the manuscript.

## 432 **Availability of data and materials**

433 All relevant data are contained within the manuscript and its Supporting Information files.

## 434 **Author Contributions**

435 **Conceptualization:** Jian Li, Jian-Min Zhu

436 **Data curation:** Can-Lei Song, Tang Wang, Shu-Hua Li

437 **Formal analysis:** Jian Li, Can-Lei Song, Tang Wang

438 **Funding acquisition:** Can-Lei Song, Shu-Hua Li

439 **Investigation:** Can-Lei Song, Tang Wang, Shu-Hua Li–

440 **Methodology:** Jian Li, Can-Lei Song, Yu-Long Ye, Jian-Ru Du

441 **Project administration:** Jian-Min Zhu  
442 **Supervision:** Can-Lei Song, Tang Wang, Jian-Min Zhu  
443 **Validation:** Jian Li, Can-Lei Song, Tang Wang, Yu-Long Ye, Jian-Ru Du, Shu-Hua Li, Jian-Min  
444 Zhu  
445 **Writing-original draft:** Jian Li, Can-Lei Song, Tang Wang  
446 **Writing-review & editing:** Jian Li, Can-Lei Song, Tang Wang, Yu-Long Ye, Jian-Ru Du,  
447 Shu-Hua Li, Jian-Min Zhu

#### 448 **Competing interests**

449 The authors declare that they have no competing interests.

#### 450 **References**

- 451 1. Chakhunashvili G, Wagner AL, Power LE, Janusz CB, Machablishvili A, Karseladze I, et al.  
452 Severe Acute Respiratory Infection (SARI) sentinel surveillance in the country of Georgia,  
453 2015-2017. PLoS One.2018;13(7):e0201497. <https://doi.org/10.1371/journal.pone.0201497>  
454 PMID:30059540. PubMed Central PMCID: PMC6066249.
- 455 2. Elhakim MM, Kandil SK, Abd Elaziz KM, Anwar WA. Epidemiology of Severe Acute  
456 Respiratory Infection (SARI) cases at a sentinel site in Egypt, 2013-15. J Public Health (Oxf).  
457 2020;42(3):525-33.[https:// doi.org/ 10.1093/pubmed/fdz053](https://doi.org/10.1093/pubmed/fdz053) PMID: 31090911. PubMed Central  
458 PMCID: PMC7107553.
- 459 3. Williams B, Gouws E, Boschi-Pinto C, Bryce J, Dye C. Estimates of world-wide distribution of  
460 child deaths from acute respiratory infections. Lancet Infect Dis. 2002;2(1):25–32. [https://](https://doi.org/10.1016/s1473-3099(01)00170-0)  
461 [doi.org/10.1016/s1473-3099\(01\)00170-0](https://doi.org/10.1016/s1473-3099(01)00170-0) PMID: 11892493.
- 462 4. WHO. The global burden of disease: 2004 update. May 21th, 2020. Available from:

- 463 [http://www.who.int/healthinfo/global\\_burden\\_disease/GBD\\_report\\_2004update\\_full.pdf](http://www.who.int/healthinfo/global_burden_disease/GBD_report_2004update_full.pdf).
- 464 5. Watt JP, Wolfson LJ, O'Brien KL, Henkle E, Deloria-Knoll M, McCall N, et al. Burden of  
465 disease caused by Haemophilus influenzae type b in children younger than 5 years: global  
466 estimates. *Lancet*. 2009;374(9693): 903–11. [https:// doi.org/10.1016/S0140-6736\(09\)61203-4](https://doi.org/10.1016/S0140-6736(09)61203-4)  
467 PMID: 19748399.
- 468 6. Subramoney K, Hellferscee O, Pretorius M, Tempia S, McMorro M, von Gottberg A, et al.  
469 Human bocavirus, coronavirus, and polyomavirus detected among patients hospitalised with sev  
470 ere acute respiratory illness in South Africa, 2012 to 2013. *Health Sci Rep*. 2018;1(8):e59.  
471 [https:// doi.org/10.1002/hsr2.59](https://doi.org/10.1002/hsr2.59) PMID: 30623094. PubMed Central PMCID: PMC6266378.
- 472 7. Razanajatovo NH, Guillebaud J, Harimanana A, Rajatonirina S, Ratsima EH, Andrianirina ZZ,  
473 et al. Epidemiology of severe acute respiratory infections from hospital-based surveillance in  
474 Madagascar, November 2010 to July 2013. *PLoS One*. 2018;13(11):e0205124. [https://](https://doi.org/10.1371/journal.pone.0205124)  
475 [doi.org/10.1371/journal.pone.0205124](https://doi.org/10.1371/journal.pone.0205124) PMID: 30462659. PubMed Central  
476 PMCID: PMC6248916.
- 477 8. WHO. WHO global technical consultation: global standards and tools for influenza surveillance.  
478 May 21th, 2020. Available from:  
479 [https://extranet.who.int/iris/restricted/bitstream/handle/10665/70724/WHO\\_HSE\\_GIP\\_2011.1\\_  
480 eng.pdf;jsessionid=53A32B0F697E2FEDAA77BF5F971ED037?sequence=1](https://extranet.who.int/iris/restricted/bitstream/handle/10665/70724/WHO_HSE_GIP_2011.1_eng.pdf;jsessionid=53A32B0F697E2FEDAA77BF5F971ED037?sequence=1).
- 481 9. Byington CL, Enriquez FR, Hoff C, Tuohy R, Taggart EW, Hillyard DR, et al. Serious bacterial  
482 infections in febrile infants 1 to 90 days old with and without viral infections. *Pediatrics*.  
483 2004;113(6):1662–6. [https:// doi.org/10.1542/peds.113.6.1662](https://doi.org/10.1542/peds.113.6.1662) PMID: 15173488.
- 484 10. Zhao Y, Lu R, Shen J, Xie Z, Liu G, Tan W. Comparison of viral and epidemiological profiles

485 of hospitalized children with severe acute respiratory infection in Beijing and Shanghai, China.  
486 BMC Infect Dis. 2019;19(1):729. [https:// doi.org/10.1186/s12879-019-4385-5](https://doi.org/10.1186/s12879-019-4385-5) PMID: 31429710.  
487 PubMed Central PMCID: PMC6701130.

488 11. Nguenha N, Tivane A, Pale M, Machalele L, Nacoto A, pPires G, et al. Clinical and  
489 epidemiological characterization of influenza virus infections in children with severe acute  
490 respiratory infection in Maputo, Mozambique: Results from the implementation of sentinel  
491 surveillance,2014-2016. PLoS One.2018;13(3):e0194138. [https://](https://doi.org/10.1371/journal.pone.0194138)  
492 [doi.org/10.1371/journal.pone.0194138](https://doi.org/10.1371/journal.pone.0194138) PMID: 29590162. PubMed Central  
493 PMCID: PMC5874022.

494 12. Yu H, Huang J, Huai Y, Guan X, Klena J, Liu S, et al. The substantial  
495 hospitalization burden of influenza in central China: surveillance for severe, acute respiratory  
496 infection, and influenza viruses, 2010-2012.Influenza Other Respir Viruses. 2014; 8(1):53-65.  
497 [https:// doi.org/10.1111/irv.12205](https://doi.org/10.1111/irv.12205) PMID: 24209711. PubMed Central PMCID: PMC4177798.

498 13. Fica A, Sotomayor V, Fasce R, Dabanch J, Soto A, Charpentier P, et al. Severe acute  
499 respiratory infections (SARI) from influenza in adult patients in Chile: the experience of a  
500 sentinel hospital. Rev Panam Salud Publica. 2019;43:e1. <https://doi.org/10.26633/RPSP.2019.1>  
501 PMID:31093225. PubMed Central PMCID: PMC6393720.

502 14. Foy HM, Cooney MK, McMahan R, et al. Viral and mycoplasmal pneumonia in a prepaid  
503 medical care group during an eight-year period. Am J Epidemiol. 1973; 97: 93-102.  
504 <https://doi.org/10.1093/oxfordjournals.aje.a121493> PMID: 4347511.

505 15. Waites KB, Xiao L, Liu Y, Balish MF, Atkinson TP. Mycoplasma pneumoniae from the  
506 respiratory tract and beyond. Clin Microbiol Rev.2017; 30: 747-809.

507 <https://doi.org/10.1128/CMR.00114-16> PMID: 28539503. PubMed Central  
508 PMID: PMC5475226.

509 16. Bureau of statistics of Jinshan district. Jinshan statistical yearbook 2018. May 20th, 2020.  
510 Available from: <http://www.jinshan.gov.cn/Attach/Attaches/201911/201911140517237545.pdf>.

511 17. WHO. Manual for the laboratory diagnosis and virological surveillance of influenza. May 21th,  
512 2020. Available from:[http://whqlibdoc.who.int/publications/2011/9789241548090\\_eng.pdf](http://whqlibdoc.who.int/publications/2011/9789241548090_eng.pdf).

513 18. Meerhoff TJ, Simaku A, Ulqinaku D, Torosyan L, Gribkova N, Shimanovich V, et al.  
514 Surveillance for severe acute respiratory infections (SARI) in hospitals in the WHO European  
515 region—an exploratory analysis of risk factors for a severe outcome in influenza-positive SARI  
516 cases. BMC Infect Dis. 2015; 15: 1.<https://doi.org/10.1186/s12879-014-0722-x>  
517 PMID: 25567701. PubMed Central PMID: PMC4314771.

518 19. Huo X, Qin Y, Qi X, Zu R, Tang F, Li L, et al. Surveillance of 16 respiratory viruses in patients  
519 with influenza-like illness in Nanjing, China. J Med Virol. 2012;  
520 84(12):1980-4. <https://doi.org/10.1002/jmv.23401> PMID: 23080506. PubMed Central  
521 PMID: PMC7166984.

522 20. Breiman RF, Cosmas L, Njenga M, Williamson J, Mott JA, Katz MA, et al. Severe acute  
523 respiratory infection in children in a densely populated urban slum in Kenya, 2007–2011. BMC  
524 Infect Dis. 2015; 15: 95.<https://doi.org/10.1186/s12879-015-0827-x> PMID: 25879805. PubMed  
525 Central PMID: PMC4351931.

526 21. Butsashvili M, Kandelaki G, Zakashvili K, Machablashvili A, Avaliani N.  
527 Influenza-associated mortality in georgia (2009-2011). Influenza Res Treat. 2012;2012:480763.  
528 <https://doi.org/10.1155/2012/480763> PMID: 23074667. PubMed Central

529       PMCID: PMC3447290.

530   22. Xu W, Guo L, Dong X, Li X, Zhou P, Ni Q, et al. Detection of viruses and mycoplasma  
531       pneumonia in hospitalized patients with severe acute respiratory infection in northern China,  
532       2015-2016. *Jpn J Infec Dis.* 2018; 71(2):134-139. <https://doi.org/10.7883/yoken.JJID.2017.412>  
533       PMID: 29491245.

534   23. Costa C, Bergallo M, Astegiano S, Sidoti F, Terlizzi ME, Gambarino S, et al. Detection of  
535       human rhinoviruses in the lower respiratory tract of lung transplant recipients. *Arch Virol*  
536       2011;156(8):1439-43. <https://doi.org/10.1007/s00705-011-0986-z> PMID: 21461933. PubMed  
537       Central PMCID: PMC7087099.

538   24. Hicks LA, Shepard CW, Britz PH, Erdman DD, Fischer M, Flannery BL, et al. Two outbreaks  
539       of severe respiratory disease in nursing homes associated with rhinovirus. *J Am Geriatr Soc*  
540       2006; 54(2):284-9. <https://doi.org/10.1111/j.1532-5415.2005.00529.x> PMID: 16460380.

541   25. Mikulska M, Del Bono V, Gandolfo N, Dini S, Dominietto A, Di Grazia C, et al.  
542       Epidemiology of viral respiratory tract infections in an outpatient haematology facility. *Ann*  
543       *Hematol* 2014;93(4):669-76. <https://doi.org/10.1007/s00277-013-1912-0> PMID: 24097084.  
544       PubMed Central PMCID: PMC7079995.

545   26. Louie JK, Yagi S, Nelson FA, Kiang D, Glaser CA, Rosenberg J, et al. Rhinovirus outbreak in  
546       a long term care facility for elderly persons associated with unusually high mortality. *Clin Infect*  
547       *Dis* 2005;41(2):262-5. <https://doi.org/10.1086/430915> PMID: 15983926. PubMed Central  
548       PMCID: PMC7107978.

549   27. Wald TG, Shult P, Krause P, Miller BA, Drinka P, Gravenstein S. A rhinovirus outbreak among  
550       residents of a long-term care facility. *Ann Intern Med* 1995;123(8):588-93.

551 <https://doi.org/10.7326/0003-4819-123-8-199510150-00004> PMID: 7677299.

552 28. Wang KQ, Xi W, Yang DH, Zheng YL, Zhang YQ, Chen YS, et al. Rhinovirus is associated  
553 with severe adult community-acquired pneumonia in China. *J Thorac Dis*;  
554 2017;9(11):4502-4511. <https://doi.org/10.21037/jtd.2017.10.107> PMID: 29268520. PubMed  
555 Central PMCID: PMC5721016.

556 29. Lui G, Ip M, Lee N, Rainer TH, Man SY, Cockram CS, et al. Role of ‘atypical pathogens’  
557 among adult hospitalized patients with community-acquired  
558 pneumonia. *Respirology*.2009; 14(8):1098–1105. <https://doi.org/10.1111/j.1440-1843.2009.016>  
559 37.x PMID: 19818051.

560 30. Goktas S, Sirin MC. Prevalence and seasonal distribution of respiratory viruses during the  
561 2014 – 2015 season in Istanbul. *Jundishapur J Microbiol*. 2016; 9(9): e39132.  
562 <https://doi.org/10.5812/jjm.39132> PMID: 27800148. PubMed Central PMCID: PMC5086027.

563 31. Azziz Baumgartner E, Dao CN, Nasreen S, Bhuiyan MU, Mah-E-Muneer S, Ai Mamun A. et  
564 al. Seasonality, timing, and climate drivers of influenza activity worldwide. *J Infect Dis*. 2012;  
565 206(6):838-46. <https://doi.org/10.1093/infdis/jis467> PMID: 22829641.

566 32. Zhang Y, Muscatello DJ, Wang Q, Yang P, Pan Y, Huo D, et al. Hospitalizations for  
567 influenza-associated severe acute respiratory infection, Beijing, China, 2014-2016. *Emerg*  
568 *Infect Dis*. 2018;24(11):2098-2102.<https://doi.org/10.3201/eid2411.171410> PMID: 30334719.  
569 PubMed Central PMCID: PMC6199980.

570 33. Thompson WW, Shay DK, Weintraub E, Brammer L, Bridges CB, Cox NJ, et al.  
571 Influenza-associated hospitalizations in the United States. *JAMA*. 2004; 292(11):1333–1340.  
572 <https://doi.org/10.1001/jama.292.11.1333> PMID: 15367555.

573 34. Hasman H, Pachucki CT, Unal A, Nguyen D, Devlin T, Peeples ME, et al. Aetiology of  
574 influenza-like illness in adults includes parainfluenzavirus type 4. J Med Microbiol. 2009;58  
575 (Pt4):408–413. <https://doi.org/10.1099/jmm.0.006098-0> PMID: 19273634. PubMed Central  
576 PMCID: PMC2778239.

577

578

579

580 **Table 1.** Demographic characteristics of adult SARI patients in a surveillance hospital in Jinshan,  
581 Shanghai, April 2017 to March 2018

| Characteristics            | SARI patients                 |                                                    |                                                       | P value* |
|----------------------------|-------------------------------|----------------------------------------------------|-------------------------------------------------------|----------|
|                            | All<br>(%) <sub>[n=397]</sub> | With confirmed pathogens<br>(%) <sub>[n=250]</sub> | Without confirmed<br>pathogens (%) <sub>[n=147]</sub> |          |
| <u>GenderSex</u>           |                               |                                                    |                                                       | 0.315    |
| Male                       | 194(48.9)                     | 127(50.8)                                          | 67(45.6)                                              |          |
| Female                     | 203(51.1)                     | 123(49.2)                                          | 80(54.4)                                              |          |
| Age group_(median, years)  | 68.0                          | 67.0                                               | 69.0                                                  | 0.357    |
| <30                        | 25(6.3)                       | 17(6.8)                                            | 8(5.4)                                                | 0.786    |
| 30-39                      | 19(4.8)                       | 10(4.0)                                            | 9(6.1)                                                |          |
| 40-59                      | 58(14.6)                      | 39(15.6)                                           | 19(12.9)                                              |          |
| 60-79                      | 207(52.1)                     | 128(51.2)                                          | 79(53.7)                                              |          |
| ≥80                        | 88(22.2)                      | 56(22.4)                                           | 32(21.9)                                              |          |
| BMI                        |                               |                                                    |                                                       | 0.657    |
| <20                        | 118(29.7)                     | 73(29.2)                                           | 45(30.6)                                              |          |
| 20-25                      | 208(52.4)                     | 135(54.0)                                          | 73(49.7)                                              |          |
| >25                        | 71(17.9)                      | 42(16.8)                                           | 29(19.7)                                              |          |
| Chronic medical conditions |                               |                                                    |                                                       |          |
| At least one               | 278(70.0)                     | 178(71.2)                                          | 100(68.0)                                             | 0.505    |



|                          |           |          |          |       |
|--------------------------|-----------|----------|----------|-------|
| Asthma                   | 12(3.0)   | 6(2.4)   | 6(4.1)   | 0.345 |
| Chronic bronchitis       | 49(12.3)  | 30(12.0) | 19(12.9) | 0.787 |
| COPD                     | 28(7.1)   | 13(5.2)  | 15(10.2) | 0.060 |
| Hypertension             | 152(38.3) | 95(38.0) | 57(38.8) | 0.878 |
| Cardiovascular disease   | 30(7.6)   | 22(8.8)  | 8(5.4)   | 0.222 |
| Diabetes                 | 61(15.4)  | 38(15.2) | 23(15.6) | 0.905 |
| Cerebrovascular disorder | 20(5.0)   | 14(5.6)  | 6(4.1)   | 0.504 |
| Tumor                    | 19(4.8)   | 14(5.6)  | 5(3.4)   | 0.322 |

582 \*The  $P$  values ~~denoted~~denote comparisons between SARI patients with confirmed  
583 ~~pathogen~~pathogens and SARI patients without confirmed ~~pathogen~~pathogens.

584

585

586 **Table 2.**— Etiological agent distributions ~~of~~among adult SARI patients in a surveillance  
587 hospital in Jinshan, Shanghai, April 2017 to March 2018

| <u>Etiological agent</u> | Frequency <sup>#</sup> (n) | Percent of <u>samples</u> * (%) |
|--------------------------|----------------------------|---------------------------------|
| Influenza virus A        |                            |                                 |
| pH1N1                    | 16                         | 4.0                             |
| H3N2                     | 44                         | 11.1                            |
| Influenza virus B        |                            |                                 |
| Yamagata                 | 25                         | 6.3                             |
| Victoria                 | 2                          | 0.5                             |
| Parainfluenza virus      |                            |                                 |
| Type 1                   | 8                          | 2.0                             |
| Type 2                   | 0                          | 0                               |
| Type 3                   | 6                          | 1.5                             |
| Type 4                   | 5                          | 1.3                             |
| Human coronavirus        |                            |                                 |
| Type 229E                | 6                          | 1.5                             |
| Type OC43                | 4                          | 1.0                             |

|                              |     |      |
|------------------------------|-----|------|
| Type HKU1                    | 6   | 1.5  |
| Type NL63                    | 8   | 2.0  |
| Respiratory syncytial virus  |     |      |
| Type A                       | 0   | 0    |
| Type B                       | 2   | 0.5  |
| Human rhinovirus             | 32  | 8.1  |
| Adenovirus                   | 46  | 11.6 |
| Human metapneumovirus        | 6   | 1.5  |
| Human bocavirus              | 1   | 0.3  |
| <i>Mycoplasma pneumoniae</i> | 95  | 23.9 |
| Single infection             | 198 | 49.9 |
| Multiple infection           |     |      |
| 2 pathogens                  | 43  | 10.8 |
| 3 pathogens                  | 8   | 2.0  |
| 4 pathogens                  | 1   | 0.3  |

588 #The frequency of each pathogen may include both the samples ~~of~~ with single infection and those  
589 with multiple infection, and their total number is larger than the sum of samples with single  
590 infection and multiple infection. \*Percent of samples ~~referred to~~ is the frequency of samples with a  
591 positive etiology divided by the total enrolled samples (397 cases).

592  
593  
594  
595  
596  
597  
598  
599  
600  
601  
602

603 **Table 3.** Clinical and epidemiologic characteristics of adult SARI patients in a surveillance  
604 hospital in Jinshan, Shanghai, April 2017 to March 2018

| Characteristics                                      | SARI patients                 |                                                    |                                                       | P value*     |
|------------------------------------------------------|-------------------------------|----------------------------------------------------|-------------------------------------------------------|--------------|
|                                                      | All<br>(%) <sub>[n=397]</sub> | With confirmed pathogens<br>(%) <sub>[n=250]</sub> | Without confirmed<br>pathogens (%) <sub>[n=147]</sub> |              |
| Temperature $\geq 39^{\circ}\text{C}$                | 189(47.6)                     | 126(50.4)                                          | 63(42.9)                                              | 0.176        |
| Cough                                                | 394(99.2)                     | 249(99.6)                                          | 145(98.6)                                             | 0.558        |
| Sputum production                                    | 351(88.4)                     | 219(87.6)                                          | 132(89.8)                                             | 0.509        |
| Pharyngalgia                                         | 27(6.8)                       | 18(7.2)                                            | 9(6.1)                                                | 0.680        |
| Thoracalgia                                          | 28(7.1)                       | 19(7.6)                                            | 9(6.1)                                                | 0.687        |
| Dyspnea                                              | 19(4.8)                       | 11(4.4)                                            | 8(5.4)                                                | 0.808        |
| Runny nose                                           | 11(2.8)                       | 7(2.8)                                             | 4(2.7)                                                | 1.000        |
| Vomiting                                             | 15(3.8)                       | 10(4.0)                                            | 5(3.4)                                                | 0.795        |
| Acceptance of chest<br>radiographic exam             | 382(96.2)                     | 236(94.4)                                          | 146(99.3)                                             | <b>0.013</b> |
| Presence of radiographic<br>diagnosis of pneumonia   | 258/382(67.5)                 | 153/236(64.8)                                      | 105/146(71.9)                                         | 0.349        |
| Visited a live poultry<br>market                     | 3(0.8)                        | 3(1.2)                                             | 0(0)                                                  | 0.299        |
| Contact with live poultry                            | 30(7.6)                       | 19(7.6)                                            | 11(7.5)                                               | 1.000        |
| Contact with patient with<br>fever                   | 32(8.1)                       | 24(9.6)                                            | 8(5.4)                                                | 0.182        |
| Smoking                                              |                               |                                                    |                                                       | 0.860        |
| Current                                              | 43(10.8)                      | 28(11.2)                                           | 15(10.2)                                              |              |
| Former                                               | 66(16.6)                      | 43(17.2)                                           | 23(15.6)                                              |              |
| Never                                                | 288(72.6)                     | 179(71.6)                                          | 109(74.2)                                             |              |
| Vaccinated with<br>pneumococcal conjugate<br>vaccine | 5(1.3)                        | 3(1.2)                                             | 2(1.4)                                                | 1.000        |

|                                   |        |        |      |       |
|-----------------------------------|--------|--------|------|-------|
| Vaccinated with influenza vaccine | 1(0.3) | 1(0.4) | 0(0) | 1.000 |
|-----------------------------------|--------|--------|------|-------|

605 \*The ~~P~~ values ~~denoted~~denote comparisons between SARI patients with confirmed  
606 ~~pathogen~~pathogens and SARI patients without confirmed ~~pathogen~~pathogens.

607

608

609 **Table 4. Comparison of characteristics of single-infected SARI patients infected with only one of**

610 **the by 6 main pathogens in a surveillance hospital in Jinshan, Shanghai, April 2017 to March 2018-**

| Characteristics                 | <i>M. pneumoniae</i> (%)<br>[n=51] | AdV_(%)<br>[n=31] | HRhV_(%)<br>[n=19] | Flu A/H3N2_(%)<br>[n=35] | Flu B/Yamagata_(%)<br>[n=21] | Flu A/pH1N1_(%)<br>[n=16] | P value*     |
|---------------------------------|------------------------------------|-------------------|--------------------|--------------------------|------------------------------|---------------------------|--------------|
| <b>Gender</b><br><u>Sex</u>     |                                    |                   |                    |                          |                              |                           | <b>0.750</b> |
| Male                            | 28(54.9)                           | 19(61.3)          | 8(42.1)            | 18(51.4)                 | 9(42.9)                      | 8(50.0)                   |              |
| Female                          | 23(45.1)                           | 12(38.7)          | 11(57.9)           | 17(48.6)                 | 12(57.1)                     | 8(50.0)                   |              |
| Age group(years)                |                                    |                   |                    |                          |                              |                           | 0.247        |
| <30                             | 5(9.8)                             | 3(9.7)            | 1(5.3)             | 1(2.9)                   | 0(0)                         | 2(12.5)                   |              |
| 30-39                           | 3(5.9)                             | 3(9.7)            | 0(0)               | 0(0)                     | 1(4.8)                       | 1(6.3)                    |              |
| 40-59                           | 12(23.5)                           | 1(3.2)            | 2(10.5)            | 5(14.3)                  | 3(14.3)                      | 2(12.5)                   |              |
| 60-79                           | 20(39.2)                           | 15(48.4)          | 8(42.1)            | 24(68.6)                 | 12(57.1)                     | 9(56.3)                   |              |
| ≥80                             | 11(21.6)                           | 9(29.0)           | 8(42.1)            | 5(14.3)                  | 5(23.8)                      | 2(12.5)                   |              |
| <u>At least one comorbidity</u> | 25(49.0)                           | 23(74.2)          | 13(68.4)           | 26(74.3)                 | 18(85.7)                     | 11(68.8)                  | <b>0.034</b> |
| Temperature ≥39_°C              | 30(58.8)                           | 16(51.6)          | 6(31.6)            | 16(45.7)                 | 9(42.9)                      | 8(50.0)                   | 0.444        |
| Cough                           | 51(100)                            | 31(100)           | 19(100)            | 34(97.1)                 | 21(100)                      | 16(100)                   | 0.705        |
| Sputum production               | 39(76.5)                           | 29(93.5)          | 15(78.9)           | 30(85.7)                 | 19(90.5)                     | 16(100)                   | 0.120        |
| Pharyngalgia                    | 3(5.9)                             | 3(9.7)            | 2(10.5)            | 2(5.7)                   | 2(9.5)                       | 2(12.5)                   | 0.876        |
| Thoracalgia                     | 4(7.8)                             | 2(6.5)            | 1(5.3)             | 0(0)                     | 2(9.5)                       | 1(6.3)                    | 0.523        |
| Dyspnea                         | 0(0) †                             | 1(3.2)            | 4(21.1) †          | 1(2.9)                   | 1(4.8)                       | 0(0)                      | <b>0.007</b> |
| Runny nose                      | 1(2.0)                             | 1(3.2)            | 1(5.3)             | 1(2.9)                   | 0(0)                         | 2(12.5)                   | 0.360        |

|                                                 |                       |          |          |                       |          |          |              |
|-------------------------------------------------|-----------------------|----------|----------|-----------------------|----------|----------|--------------|
| Vomiting                                        | 0(0)                  | 3(9.7)   | 0(0)     | 3(8.6)                | 1(4.8)   | 1(6.3)   | 0.123        |
| Presence of radiographic diagnosis of pneumonia | 38(74.5) <sup>#</sup> | 17(54.8) | 13(68.4) | 15(42.9) <sup>#</sup> | 13(61.9) | 7(43.8)  | <b>0.042</b> |
| Visited a live poultry market                   | 1(2.0)                | 1(3.2)   | 0(0)     | 0(0)                  | 0(0)     | 0(0)     | 0.880        |
| Contact with live poultry                       | 6(11.8)               | 3(9.7)   | 2(10.5)  | 1(2.9)                | 1(4.8)   | 1(6.3)   | 0.753        |
| Contact with a patient with fever               | 3(5.9)                | 4(12.9)  | 2(10.5)  | 1(2.9)                | 3(14.3)  | 2(12.5)  | 0.442        |
| Current Smoking                                 | 2(3.9)                | 4(12.9)  | 2(10.5)  | 6(17.1)               | 3(14.3)  | 3(18.8)  | 0.333        |
| Former Smoking                                  | 10(19.6)              | 7(22.6)  | 2(10.5)  | 7(20.0)               | 3(14.3)  | 0(0)     |              |
| Never Smoking                                   | 39(76.5)              | 20(64.5) | 15(78.9) | 22(62.9)              | 15(71.4) | 13(81.3) |              |

611 \*The  $P$  values denote comparisons among the six main pathogens. † and #—signify  
612  $P < 0.05$  for pairwise comparisons. † refers to comparisons between the single-infected SARI  
613 patients with *M. pneumoniae* and those with HRhV. # refers to the comparisons  
614 between the single-infected SARI patients infected with *M. pneumoniae* and those infected  
615 with Flu A/H3N2.

616

617

618 **Table 5.**—Treatments and prognosis of in adult SARI patients in a surveillance hospital in

619 Jinshan, Shanghai, April 2017 to March 2018

| Characteristics                      | SARI patients      |                                         |                                            | $P$ value* |
|--------------------------------------|--------------------|-----------------------------------------|--------------------------------------------|------------|
|                                      | All<br>(%) [n=397] | With confirmed pathogens<br>(%) [n=250] | Without confirmed<br>pathogens (%) [n=147] |            |
| Clinical course (median, days)       |                    |                                         |                                            |            |
| From illness onset to admission      | 3                  | 3                                       | 3                                          | 0.567      |
| Length of hospitalization            | 10                 | 10                                      | 10                                         | 0.545      |
| Antibiotics prior to hospitalization | 241 (61.0)         | 151 (60.9)                              | 90 (61.2)                                  | 0.723      |
| Antibiotics during hospitalization   | 393(99.0)          | 246(98.4)                               | 147(100)                                   | 0.301      |
| Antivirals                           | 11(2.8)            | 7(2.8)                                  | 4(2.7)                                     | 1.000      |
| Glucocorticoids                      | 112(28.2)          | 72(27.2)                                | 40(28.8)                                   | 0.734      |
| Oxygen therapy                       | 196(49.4)          | 124(49.6)                               | 72(49.0)                                   | 0.918      |

|               |          |          |          |       |
|---------------|----------|----------|----------|-------|
| Complications | 61(15.4) | 37(14.8) | 24(16.3) | 0.684 |
| Death         | 3(0.8)   | 2(0.8)   | 1(0.7)   | 1.000 |

620 \*~~The~~  $P$  values ~~denoted~~denote comparisons between SARI patients with confirmed  
621 ~~pathogen~~pathogens and SARI patients without confirmed ~~pathogen~~pathogens.

January 5, 2020

Dear editor,

On behalf of my co-authors, we are very appreciated to know that our manuscript (PONE-D-20-19561) is potentially acceptable for publication in PLOS ONE. We thank editors and reviewers greatly for their positive comments on our manuscript. These comments are greatly helpful in improving our manuscript and are addressed carefully. We made corresponding revisions to the manuscript according to comments. The revised manuscript highlights changes made to the original version with red color. Also, we provide a point-by-point response to each comment. The revised manuscript has been polished by a professional, native English speaker from Springer Nature for language usage, spelling, and grammar. In addition, we agree to provide the minimal data set underlying the findings as Supporting Information files for data-sharing.

We believe that the revised version of manuscript is improved highly and attached please find the revised manuscript. We ensure that our manuscript has conformed to the journal style, and we confirm that all author details on the revised version are correct, that all authors have agreed to authorship and order of authorship for this manuscript. We hope the manuscript will receive your kind consideration and be published in your valuable journal.

We would like to express our great appreciation to you and reviewers for comments on our manuscript. Looking forward to hearing from you.

Best regards.

Yours sincerely,

Jian Li

## **Response to Specific Comments:**

1. Specimen collection and laboratory testing: This section need further clarification. Please specify the multiplex PCR used. Did the authors used method described in previous literatures or commercial kit?

**Answer:** We thank for these suggestions and have made further clarification. The multiplex PCR used is the commercial kit. We added the data about multiplex PCR and made further clarification (see Page 7, line 154 to Page 8, line 156 in **Revised Manuscript with Track Changes, the same below**).

Line 219 – 223: Not sure what the authors wish to convey, please rephrase for clarification.

**Answer:** We are sorry and have rephrased these sentences (see Page 11, line232-236).

2. Line 260 – 265: Not clear on what the authors' intention on these statement, please clarify.

**Answer:** These sentences in line 260-265 mean to show that there were no significant differences of therapy between SARI patients with confirmed pathogen and those without confirmed pathogen. We have modified our text as advised (see Page 13, line 280-286).

3. Line 295 – 299: This argument does not hold. These are not fair comparison since this study excluded children.

**Answer:** This comment is appreciated highly. We deleted these sentences in line 295-298 following this comment, and revised the next sentence in line 298-299(see Page 15, line321-323).



4. Ethical statement: This needs to be included in the Materials and Methods section and needs to include approval number.

**Answer:** The ethical statement has been moved to the Materials and Methods section, and the approval number has been added (see Page 9, line 181-186).

### **Response to Journal Requirements:**

1. Please ensure that your manuscript meets PLOS ONE's style requirements, including those for file naming. The PLOS ONE style templates can be found at

[https://journals.plos.org/plosone/s/file?id=wjVg/PLOSONe\\_formatting\\_sample\\_main\\_body.pdf](https://journals.plos.org/plosone/s/file?id=wjVg/PLOSONe_formatting_sample_main_body.pdf) and

[https://journals.plos.org/plosone/s/file?id=ba62/PLOSONe\\_formatting\\_sample\\_title\\_authors\\_affiliations.pdf](https://journals.plos.org/plosone/s/file?id=ba62/PLOSONe_formatting_sample_title_authors_affiliations.pdf)

**Answer:** We ensure that our manuscript meets the journal's style.

2. In your methods and ethics statement, please state whether you obtained consent from parents or guardians of minors under 18 years old.

**Answer:** We have stated that the consent from parents or guardians of those under 18 years old have been obtained in the section of "ethics statement" (see Page 9, line 184-186).

3. PLOS ONE requires experimental methods to be described in enough detail to allow suitably skilled investigators to fully replicate and evaluate your study. See <https://journals.plos.org/plosone/s/submission-guidelines#loc-materials-and-methods> for more information.

To comply with PLOS ONE submission guidelines, in your Methods section, please provide a more detailed description of your methodology, specifically about your

respiratory pathogens 15 multiplex real-time RT-PCR, Flu A/B RT-PCR, and flu typing methods.

**Answer:** We have provided a more detailed description of methodology in the section of specimen collection and laboratory testing as advised (see Page 7, line 142 to Page 8, line 166).

4. We note that you have indicated that data from this study are available upon request. PLOS only allows data to be available upon request if there are legal or ethical restrictions on sharing data publicly. For information on unacceptable data access restrictions, please see <http://journals.plos.org/plosone/s/data-availability#loc-unacceptable-data-access-restrictions>.

In your revised cover letter, please address the following prompts:

a) If there are ethical or legal restrictions on sharing a de-identified data set, please explain them in detail (e.g., data contain potentially identifying or sensitive patient information) and who has imposed them (e.g., an ethics committee). Please also provide contact information for a data access committee, ethics committee, or other institutional body to which data requests may be sent.

b) If there are no restrictions, please upload the minimal anonymized data set necessary to replicate your study findings as either Supporting Information files or to a stable, public repository and provide us with the relevant URLs, DOIs, or accession numbers. Please see <http://www.bmj.com/content/340/bmj.c181.long> for guidelines on how to de-identify and prepare clinical data for publication. For a list of acceptable repositories, please see <http://journals.plos.org/plosone/s/data-availability#loc-recommended-repositories>.

We will update your Data Availability statement on your behalf to reflect the information you provide.

**Answer:** We agree to provide the minimal anonymized data set as Supporting Information files for data-sharing. And Data Availability statement has been updated, and you can revise it on our behalf.

5. Your ethics statement should only appear in the Methods section of your manuscript. If your ethics statement is written in any section besides the Methods, please move it to the Methods section and delete it from any other section. Please ensure that your ethics statement is included in your manuscript, as the ethics statement entered into the online submission form will not be published alongside your manuscript.

**Answer:** We have moved the ethics statement to the Methods sections of manuscript.

6. Please include captions for your Supporting Information files at the end of your manuscript, and update any in-text citations to match accordingly. Please see our Supporting Information guidelines for more information: <http://journals.plos.org/plosone/s/supporting-information>.

**Answer:** We have added captions for the Supporting Information files at the end of the revised manuscript (see Page 20, line 420-421), and updated in-text citations as advised.

### **Response to Reviewer #1' comments:**

#### **Reviewer #1: Dear Author**

Thank you for the very nice work, indeed it generated comprehensive and very informative data. The active surveillance is much appreciated. I understand that such

surveillance produced a lot of data which I believe is a big challenge to make the best out of it which you did through a very nice data presentation and analysis. In addition SARI surveillance in adult is not addressed much in the literature especially in developing areas. Moreover it seems that you described surveillance from a special geographical area characterized with unique pattern of SARI surveillance especially for the influenza B as well as the summer seasonal influenza H3 peak.

**Comments:**

1- The 1st letters in the title are to be capitalized.

**Answer:** The first letters in the title have been capitalized as advised.

Abstract

1- In the abstract line 71-73, the statement “No significant difference among ... rate of main pathogens.” is unclear, please rephrase.

**Answer:** We have modified the statement of this sentence (see Page 3, line 62-64).

Methods

2- Line 132 please insert a reference for Sari definition.

**Answer:** We thank for this suggestion. A reference for SARI definition has been inserted (see Page 6, line 123).

3- Please specify details of sample collection: oropharyngeal or nasopharyngeal or both, type of the swabs used and manufacturer, VTM inhouse prepared or commercial and it's manufacturer, duration of sample storage till transportation.

**Answer:** We have specified the details of sample collection including the type of swab and manufacturer. The information of VTM manufacturer and duration of sample storage till transportation have been provided as advised (see Page 7, line 142-147).

4- Please specify the type of kits used : catalogue number, manufacturer or if it is inhouse made, provide primers and reagent used along with the reference.

**Answer:** The information of PCR kits has been specified (see Page 7, line 154 to Page 8, line 156). Both of the primers and reagent came from the PCR kit. The testing process of PCR was conducted according to the manufacturer's protocols.

5- Study subjects: Are the patients admitted in ICU or regular wards?

**Answer:** The patients in this study included those admitted in ICU, respiratory medicine department and general wards, which was specified in the Study Subject section (see Page 6, line 118-119).

6- Line 158-159 "Specimens were lysed at strongly denaturing conditions to deactivate RNases" please provide a reference as I believe that harsh conditions may affect the target fragile viral RNA.

**Answer:** We have followed the comment, deleted the term of "strongly" and rephrased the sentence in line 158, also, a reference has been provided according to your suggestion (see Page 7, line 151-152).

7- Line 160: using term "contaminant" is incorrect

**Answer:** Another reviewer thought that it was unnecessary to keep the sentence which was located in line 159-160, namely, "After adding alcohol and loading lysates onto the QIAamp spin column, viral RNA and DNA combined to the QIAamp silica membrane while contaminants passed through". We followed this suggestion and deleted this sentence which included the term of "contaminant".

## Results

8- Line 237: it is not clear where did these numbers came from (20/95, 21/94) and how can the P value show significant difference between these very close findings. Please recheck and clarify.

**Answer:** The denominator (95,94) were the total number of monitoring patients in summer(Jun-Aug) and autumn(Sep-Nov) respectively, and the numerator(20,21) were the positive number of patients in summer(Jun-Aug) and autumn(Sep-Nov) respectively. As for the P value, we are sorry for negligence. The P value should be 0.83 and the difference is not significant. Thanks for point to this mistake, we have corrected it (see Page 12, line 254).

9- Line 239 and 240 please clarify what this P value indicates.

**Answer:** We have clarified the significance of this P value (see Page 12, line 254-256).

#### Discussion

10- For the significant P values, you addressed the comorbidities in the discussion. What about the dyspnea and the radiologic examination.

**Answer:** We thanks for this comment. We have addressed the dyspnea and presence of radiographic diagnosis of pneumonia in the discussion (see Page 16, line 344 to Page 17, line 364).

11- Findings in the result section line 224 and 225 were not discussed regarding the Xray finding in the mycoplasma and rhino causing dyspnea.

**Answer:** We thanks for this comment and have discussed them accordingly (see Page 16, line 344 to Page 17, line 357).

12- In the discussion, comparison of the patients from Madagascar and yours is irrelevant as they enrolled pediatric patients that were excluded from your study.

**Answer:** This comment is appreciated and we deleted this comparison in the discussion.

13- Line 311: You discuss cough as being the most common symptom, this is obvious

as it in part of the inclusion criteria. Rather, you should address elaboration about the pneumonia and bronchiolitis.

**Answer:** We are sorry for no discussing the pneumonia in discussion on account of space limitation of original manuscript. In the revised paper, we have discussed the pneumonia and bronchiolitis following the suggestion (see Page 16, line 340-344).

Figures and tables:

14- Figure 3: Percentage of the y axis is not clear (is it from the total enrolled or from the positive cases only). Please provide your definition of the detection rate.

**Answer:** We have clarified the significance of y axis and provided the definition of the detection rate in Fig 2 and Fig3.

15- Table 5: please draw lines between columns as it is confusing.

**Answer:** We have drawn lines between columns in all 5 tables according to this comment(see Table 5).

16- Table 4: Title is not informative. Significant P values need further analysis to detect the significance is between which 2 groups.

**Answer:** Title of table 4 has been revised (see Page 31, line 609-610). As for 3 variables with significant P value, we conducted the pairwise comparison (see Page 32, line 611-615). Also, we revised the statistics section accordingly (see Page 9, line 177-178).

17- Table3: It is not clear what is meant by “Chest radiographic exam”, please clarify especially that it shows significant P value and should be addressed in the discussion.

**Answer:** It means the acceptance of chest radiographic exam, we have revised it and clarified especially in bold font in table 3. And we addressed it in the discussion (see Page 17, line 357-364).

18- In table 2 : Percent is done from the total enrolled cases or from the positive ones. Please clarify and add the total number at the end.

**Answer:** Percent refers to the frequency of positive etiology divided by the total enrolled samples (397 cases). We have provided the explanation for it under the table 2 and added the total number at the end (see Page 29, line 590-591).

#### **GENERAL:**

19- Please specify that the surveillance addresses the community acquired infections.

**Answer:** We have specified this important significance of surveillance system in the Background section (see Page 5, line 99-101).

20- When you mention “Presence of radiographic diagnosis of pneumonia” you mean, lobar pneumonia denoting mostly bacterial origin, or atypical pneumonia denoting viral or atypical bacterial origin (*Mycoplasma*). These details need to be mentioned especially for the negative cases as they may indicate other non-tested bacterial etiology.

**Answer:** We are sorry that our case report form is the standard structural questionnaire, and it just collected the result whether has the presence of radiographic diagnosis of pneumonia, and can not show lobar pneumonia or atypical pneumonia. Meanwhile, the pathogens tested in this piloting study only covered common respiratory viruses and *Mycoplasma pneumoniae*, and did not include respiratory bacterium. We agreed this comment and we address it in the limitation section (see Page 19, line 400-408).



21- Some sentences are ambiguous and need to be rephrased or corrected:

a. Line 149

**Answer:** The sentence in line 149 has been revised (see Page 7, line 139-140).

b. Line 188: remove “positive”

**Answer:** The term of “positive” in line 188 has been removed (see Page 9, line 190).

c. Line 191

**Answer:** The sentence in line 191 has been revised (see Page 9, line 194-195).

d. Line 273-274

**Answer:** The sentence in line 273-274 has been revised (see Page 14, line 295-297).

e. Line 295

**Answer:** The previous comment thought the sentence in line 295 did not hold, so we delete this sentence in line 295-298.

f. Line 323

**Answer:** The “viral respiratory SARI” in line 323 has been changed to “viral SARI” (see Page 18, line 376).

g. Line 341

**Answer:** The sentence in line 341 has been revised (see Page 19, line 397-398).

h. Line 345

**Answer:** The sentence in line 345 has been revised (see Page 19, line 404-407).

Recommendations:

1- The title include many details that can be removed as the age group and the study period

**Answer:** We deleted the study period (April 2017 to March 2018) from the title following the recommendation. Meanwhile, we respect the editor’s suggestion about

this point. Since SARI surveillance in adults is not addressed much in the literatures especially in developing areas, we think it'd better to keep 'adult' in the title to show the difference from other studies.

2- Seasonality is better described in Epidemiologic weeks (Epi-weeks)

**Answer:** We respect this recommendation and it is accepted that seasonality can be described in both weeks and months. Some studies about SARI surveillance described seasonality in months, such as reference of 10 and 20. Also, our piloting study only last for 12 months and did not include enough patients. In the case of relatively small sample size of patients with confirmed pathogens, the use of weeks will make the seasonality character can not be better displayed. So we thought it is better to describe seasonality in months in order to show the characteristics of seasonality of SARI clearly.

**Response to Reviewer #2' comments:**

**Reviewer #2:** The authors described the etiological and epidemiological characters of severe acute respiratory infection caused by multiple viruses and mycoplasma pneumoniae in adult patients in Jinshan of Shanghai, April 2017 to March 2018. So before publication there are some points need to revise as following:-

Major questions Must be clarified:-

1- Why did the authors not represent the values of real time PCR / RT-PCR for the detected pathogens as an indicator for the load of different pathogens and if there are variations among their load in relation to seasonal variation?

**Answer:** The PCR kit this study used is a qualitative detection kit. The detecting results were judged by Tm value of various pathogens according to melting curve. The kit didn't provide the quantitative value for the load of different pathogens. So, we are sorry that we can't state if there are variations among loads in relation of seasonal variation. We have clarified the qualitative characteristic of PCR kit in the

manuscript following in this comment (see Page 7, line 154 to Page 8, line 156).

2- Only pathogens from males (173 positive cases) were statistically analyzed in relation to different variants such as type of pathogen, clinical and diagnostic parameters, age.....etc Why did not authors do the same data analysis for female samples (77 positive cases) as in table 4? Also, Table 1 based mainly on male cases (194) and no data concerning the female (203), why?

**Answer:** Please allow us to clarify these problems. Both of the differences between males and females for the proportions in table 4 and table 1 have been analyzed, and initially, we omitted to display the information of female patients on consideration of controlling the length of table. We have added a row to show the female information in table 1 and table 4.

3- Among 19 pathogens have been detected authors decided to focus on only 6 pathogens although other studies stated the predominance of other pathogens such as RSV?

**Answer:** This study detected 17 kinds of pathogens, in which the number of six pathogens exceeds 10. So we focus on these 6 main pathogens as the number of other seven pathogens all was fewer than 10. Table 2 described all detected pathogens. We have clarified this in the discussion (see Page 15, line 313-319).

Minor comments

1-The manuscript should be revised carefully for typographical errors.

**Answer:** We have revised carefully for typographical error of the manuscript.

Abstract

2-abbreviations in line 71 should be defined at its first appearance as in line 66 then use the abbreviations

**Answer:** The names of viruses in line 71 have been defined with their full names at their first appearance (see Page 2, line 38 and Page 3, line 49-52). Other abbreviations

in the manuscript have also been checked and revised.

3-lines 66-67 only 217 pathogens reported while in line 63 they are 250, could you mention the other type of etiological agent and its frequency.

**Answer:** 217 pathogens in lines 66-67 refers to the total frequency of 4 main pathogens, and 250 in line 63 is the total number of patients who were identified as at least 1 pathogen. We have followed this suggestion and added the other type of etiological agents and their frequency in the abstract (see Page 3, line 51-57).

Background

4-line 100:- "owing to the lack of gold standard methods to swiftly determine etiological diagnoses" change to "owing to the lack of gold standard diagnostic methods to swiftly determine etiological agents"

**Answer:** We thanks for this suggestion and revised this sentence accordingly(see Page 4, line 84-85).

Materials and methods

5-Line 133:- " $\geq 38^{\circ}\text{C}$ , cough, with onset within the last 10 days and require hospitalization" change to " $\geq 38^{\circ}\text{C}$ , cough onset within the last 10 days and require hospitalization"

**Answer:** We thanks for this suggestion and revised this sentence accordingly (see Page 6, line 122-123).

6-Lines 137-138:- "vaccination (vaccinating influenza vaccine during 1 year before illness onset, vaccinating pneumococcal conjugate vaccine)" change to "vaccination (receiving influenza vaccine during 1 year before illness onset, and pneumococcal conjugate vaccine)"

**Answer:** We thanks for this suggestion and revised this sentence accordingly (see Page 6, line 127-128).

7-Line 149:- "149 information that could identify the identification of patients was masked during or after data" change to "149 information that could identify the personality of patients was masked during or after data"

**Answer:** We thanks for this suggestion and revised this sentence accordingly (see Page 7, line 139-140).

8-Line 157:- "viral RNA and DNA using the QIAamp Viral RNA Mini Kit (Qiagen, Hilden, Germany) following " change to "viral RNA and DNA using the QIAamp Viral RNA/DNA Mini Kit (Qiagen, Hilden, Germany) following"

**Answer:** We are sorry for this negligence and revised this sentence according to the suggestion (see Page 7, line 148-150).

9-Lines 161-162:- "Total nucleic acid extracts were further processed by multiplex real-time reverse transcription" change to "Viral nucleic acid extracts were further processed by multiplex real-time reverse transcription" since you used kit for viral nucleic acid (RNA or DNA)

**Answer:** We thanks for this suggestion and revised this sentence accordingly(see Page 7, line 153-154).

10-Lines 163-163:- "Respiratory pathogens 15 multiplex real-time RT-PCR diagnostic strategy was adopted to detect PIV (types 1, ....." change to "The multiplex real-time RT-PCR diagnostic strategy was adopted to detect 15 respiratory pathogens, PIV (types 1, ....."

**Answer:** We thanks for this suggestion and revised this sentence following the suggestion (see Page 7, line 154 to Page 8, line 156).

## Results

11-As general when you describe the results please make full description of the full cases either positive or not and do not leave unclear such as line 212 you mentioned 382 cases and ignored the residue 15 cases and this was repeated all over the manuscript, do not leave anything for guessing.

**Answer:** We thank for this suggestion, and have tried our best to clarify these unclear descriptions all over the manuscript as advised (see Page 9, line 191-197; Page 10, line 199-200; Page 11, line 222-225; Page 13, line 277-280 ).

12-Lines 199-203:- Authors described the frequency and type of pathogens, however in compare to table 2 there is confusion concerning the pathogen frequency as in text 198 singl and 52 multiple, while later on the number will be 232 and in table 312, how can this occur? please clarify this.

**Answer:** Number of 198 and 52 in line 199 were the number of patients with single and multiple infections, respectively. Numbers from line 201 to line 203 including 95 (*M. pneumoniae*), 46 (AdV), 44 (Flu A/H3N2), 32 (HRhV), 25 (Flu B/Yamagata) represent the frequency of identified pathogen which was detected most frequently, and their meaning was different from that in line 199. Numbers from the 3<sup>rd</sup> row( 16 for Flu A/pH1N1) to the 25<sup>th</sup> row(95 for *M. pneumoniae*) in table 2 also represent the frequency of identified pathogens and their total number equals to 312. We have revised the corresponding description in section of etiology (see Page 10, line 206-214), and added the explanation for frequency under the table 2.

13-lines 213-215:- "Thirty-two SARI patients and 30 patients had exposure of contacting with patients with fever and respiratory symptoms and contacting with live poultry during 2 weeks before their illness onset, respectively" change to "Thirty-two SARI patients had exposures with fever and respiratory symptoms patients while 30 SARI patients contacted with live poultry during 2 weeks before their illness onset"

**Answer:** We thanks for this suggestion and revised this sentence following the suggestion (see Page 11, line 225-227).

#### Tables

1- Table 1 1st row change " All SARI SARI patient with confirmed pathogens SARI patient without confirmed pathogens" to "All with confirmed pathogens without confirmed pathogens" and add SARI patient above as another row.

**Answer:** We have revised the 1<sup>st</sup> row of Table 1 and added SARI patient above as another row following this suggestion (see Table 1).

2- Table 2 1st column please change "viral etiology" to "etiology" only because there is a bacteria also mentioned there.

**Answer:** We are sorry for this negligence and have changed it according to the suggestion (see Table 2).

3- Table 3 1st row change " All SARI SARI patient with confirmed pathogens SARI patient without confirmed pathogens" to "All with confirmed pathogens without confirmed pathogens" and add SARI patient above as another row. Visiting a live poultry market and Contact with live poultry in table 3 looks the same where in table 4 it become one category Contact with live poultry.

**Answer:** We have revised the 1<sup>st</sup> row of Table 3 and added SARI patient above as another row following this suggestion, so does the Table 5. Contact with live poultry included contacting with live poultry at home and other place (such as live poultry market), so it is different from visiting a live poultry market. Since the number of patients visiting a live poultry market was just 3 cases, and it only included 1 case with single-infected *M. pneumoniae* positivity and 1 case with single-infected AdV positivity, the third case belonged to multiple infections, so the initial table 4 didn't analyze this variable. We have analyzed it in table 4 according to this comment (see Table 4).

#### Figures

The presented pathogens in Fig 1-3 based only on male SARI cases with confirmed pathogens or included all pathogens from male and female cases.

**Answer:** The pathogens in Fig1-3 based on all SARI cases with confirmed pathogens including male and female cases.
